# Supplementary material for: Silver Dependent Enantiodivergent Gold(I) Catalysed Asymmetric Intramolecular Hydroamination of Alkenes: A Theoretical Study
Source: MDPI journal article supplement (doi:10.3390/catal12111392), 2022-11-08
Supplement: s1 [file s1]

# Silver Dependent Enantiodivergent Gold(I) Catalysed Asymmetric Intramolecular Hydroamination of Alkenes: A Theoretical Study

Ruchi Dixit <sup>1,2</sup>, Himanshu Sharma <sup>1,2</sup>, Francine Agbossou-Niedercorn <sup>3</sup>, Kumar Vanka <sup>1,\*</sup> and  
Christophe Michon <sup>4,\*</sup>

<sup>1</sup>Physical and Material Chemistry Division, CSIR-National Chemical Laboratory,  
Dr. Homi Bhabha Road, Pashan, Pune 411008, Maharashtra, India

<sup>2</sup>Academy of Scientific and Innovative Research (AcSIR), Ghaziabad-201002, India

<sup>3</sup>Univ. Lille, CNRS, Centrale Lille, Univ. Artois, UMR 8181 - UCCS - Unité de Catalyse et Chimie du Solide,  
F-59000 Lille, France

<sup>4</sup>Université de Strasbourg, Université de Haute-Alsace, Ecole européenne de Chimie, Polymères et Matériaux, CNRS,  
LIMA, UMR 7042, 25 rue Becquerel, 67087 Strasbourg, France

\* Correspondence: k.vanka@ncl.res.in (K.V.); cmichon@unistra.fr (C.M.)

| Level of Theory | Cat 4a → Int 1     | Int 1 → Int 2a    | Int 1 → Int 2b   | Int 2a → Int 3a  | Int 2b → Int 3b   | Int 3a → Pdt (S)   |
|-----------------|--------------------|-------------------|------------------|------------------|-------------------|--------------------|
| PBE/def-TZVP    | $\Delta E = -17.7$ | $\Delta E = -2.9$ | $\Delta E = 1.9$ | $\Delta E = 3.6$ | $\Delta E = 1.4$  | $\Delta E = -4.3$  |
|                 | $\Delta G = -0.2$  | $\Delta G = 1.9$  | $\Delta G = 6.8$ | $\Delta G = 3.5$ | $\Delta G = 0.6$  | $\Delta G = -23.0$ |
| PBE0/def2-TZVP  | $\Delta E = -18.8$ | $\Delta E = -1.0$ | $\Delta E = 3.3$ | $\Delta E = 1.7$ | $\Delta E = 0.2$  | $\Delta E = -6.2$  |
|                 | $\Delta G = -1.3$  | $\Delta G = 3.8$  | $\Delta G = 8.2$ | $\Delta G = 1.6$ | $\Delta G = -0.6$ | $\Delta G = -24.9$ |

**Table S1.** The electronic and Gibb's free energy for each chemical step of the catalytic cycle with catalyst **4a** in toluene is provided. All values are in kcal/mol.

| Level of Theory | Cat 4c → Int 1'    | Int 1' → Int 2a' | Int 1' → Int 2b'  | Int 2a' → Int 3a' | Int 2b' → Int 3b' | Int 3b' → Pdt (R)  |
|-----------------|--------------------|------------------|-------------------|-------------------|-------------------|--------------------|
| PBE/def-TZVP    | $\Delta E = -12.2$ | $\Delta E = 0.5$ | $\Delta E = 0.0$  | $\Delta E = -4.5$ | $\Delta E = -5.0$ | $\Delta E = -1.0$  |
|                 | $\Delta G = 9.3$   | $\Delta G = 0.8$ | $\Delta G = -0.1$ | $\Delta G = 9.3$  | $\Delta G = 9.2$  | $\Delta G = -32.5$ |
| PBE0/def2-TZVP  | $\Delta E = -17.1$ | $\Delta E = 2.1$ | $\Delta E = 1.6$  | $\Delta E = -2.8$ | $\Delta E = -4.7$ | $\Delta E = -0.3$  |
|                 | $\Delta G = 4.4$   | $\Delta G = 2.3$ | $\Delta G = 1.5$  | $\Delta G = 10.9$ | $\Delta G = 9.4$  | $\Delta G = -31.8$ |

**Table S2.** The electronic and Gibb's free energy for each chemical step of the catalytic cycle with catalyst **4c** in methanol with the assistance of one molecule of methanol is provided. All values are in kcal/mol.

| Level of Theory | Cat 4c → Int 1'    | Int 1' → Int 2a' | Int 1' → Int 2b'  | Int 2a' → Int 3a' | Int 2b' → Int 3b' | Int 3a' → Pdt (S)  |
|-----------------|--------------------|------------------|-------------------|-------------------|-------------------|--------------------|
| PBE/def-TZVP    | $\Delta E = -12.2$ | $\Delta E = 0.5$ | $\Delta E = 0.0$  | $\Delta E = 1.6$  | $\Delta E = 7.4$  | $\Delta E = -10.2$ |
|                 | $\Delta G = 9.3$   | $\Delta G = 0.8$ | $\Delta G = -0.1$ | $\Delta G = 4.3$  | $\Delta G = 5.8$  | $\Delta G = -29.6$ |
| PBE0/def2-TZVP  | $\Delta E = -17.1$ | $\Delta E = 2.1$ | $\Delta E = 1.6$  | $\Delta E = -0.3$ | $\Delta E = 6.4$  | $\Delta E = -7.6$  |
|                 | $\Delta G = 4.4$   | $\Delta G = 2.3$ | $\Delta G = 1.5$  | $\Delta G = 1.4$  | $\Delta G = 5.7$  | $\Delta G = -27.0$ |

**Table S3.** The electronic and Gibb's free energy for each chemical step of the catalytic cycle with catalyst **4c** in methanol without the assistance of one molecule of methanol is provided. All values are in kcal/mol.

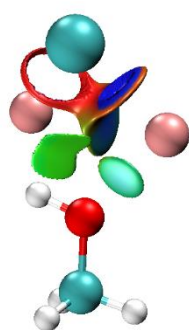

Front View

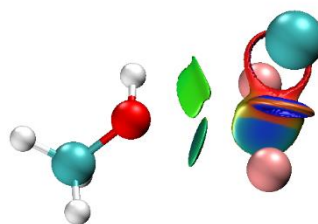

Side View

**Figure S1.** The NCI plot for non-covalent interaction between oxygen (of methanol) and Ag metal unit of **int\_3b'** has been shown. The rest part of the **int\_3b'** has been omitted for the purpose of clarity. The isosurface value is 0.5 and the color scale is  $-0.04 < \rho < 0.04$  a.u. for each figure.

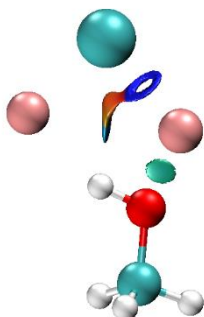

Front View

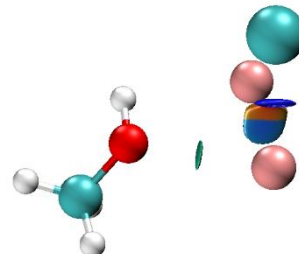

Side View

**Figure S2.** The NCI plot for non-covalent interaction between oxygen (of methanol) and Ag metal unit of **int\_3b'** has been shown. The rest part of the **int\_3b'** has been omitted for the purpose of clarity. The isosurface value is 0.3 and the color scale is  $-0.04 < \rho < 0.04$  a.u. for each figure.

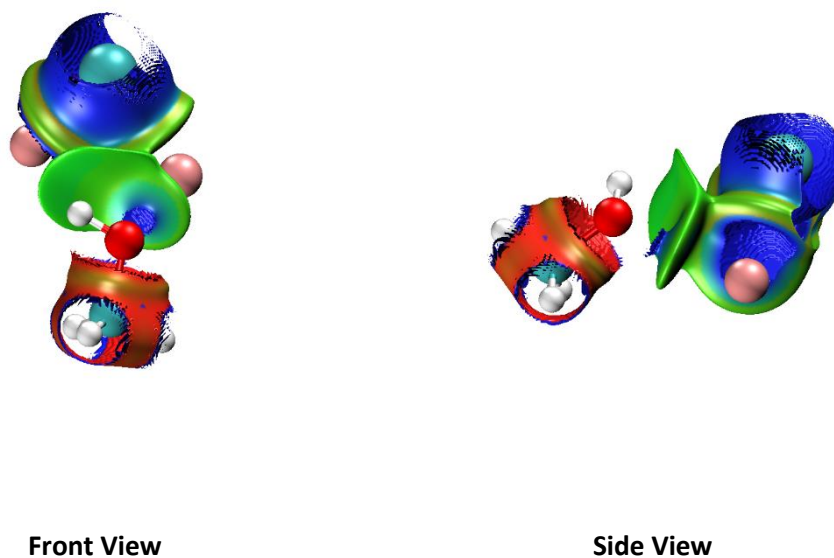

**Figure S3.** The NCI plot for non-covalent interaction between oxygen (of methanol) and Ag metal unit of **int\_3b'** has been shown. The rest part of the **int\_3b'** has been omitted for the purpose of clarity. The isosurface value is 1.0 and the color scale is  $-0.04 < \rho < 0.04$  a.u. for each figure.

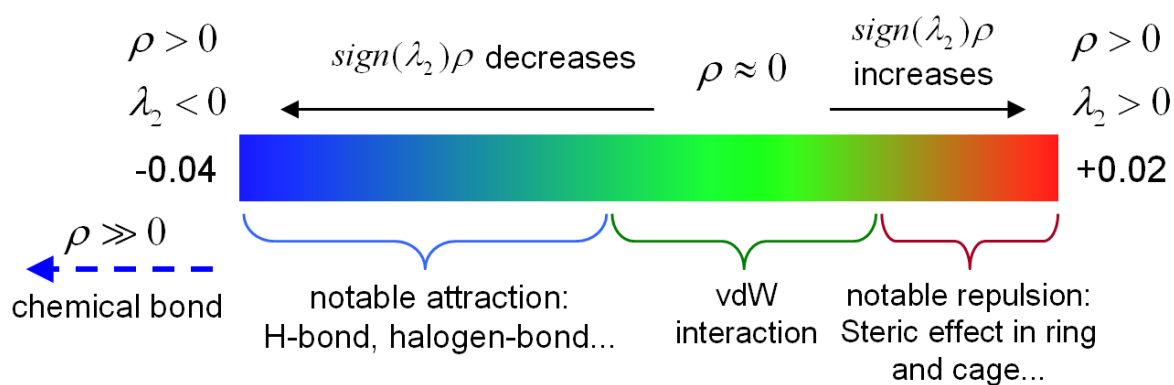

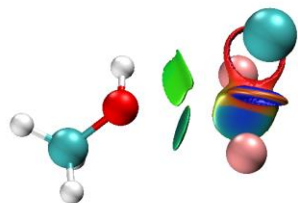

**Side View (isosurface = 0.5)**

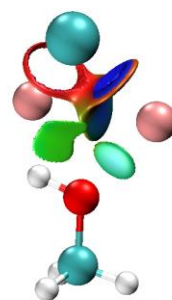

**Front View (isosurface = 0.5)**

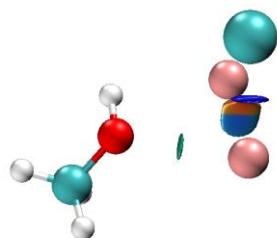

**Side View (isosurface = 0.3)**

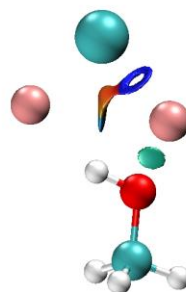

**Front View (isosurface = 0.3)**

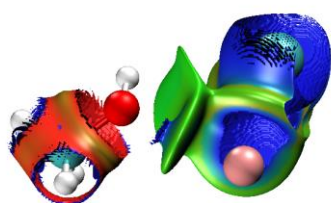

**Side View (isosurface = 1.0)**

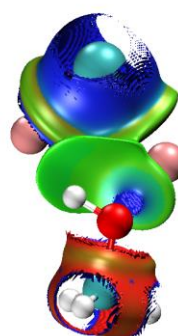

**Front View (isosurface = 1.0)**

**Figure S4.** Summary of the NCI plots for non-covalent interaction between oxygen (of methanol) and Ag metal unit of **int\_3b'** has been shown. The rest part of the **int 3b'** has been omitted for the purpose of clarity.

## HPLC chromatograms

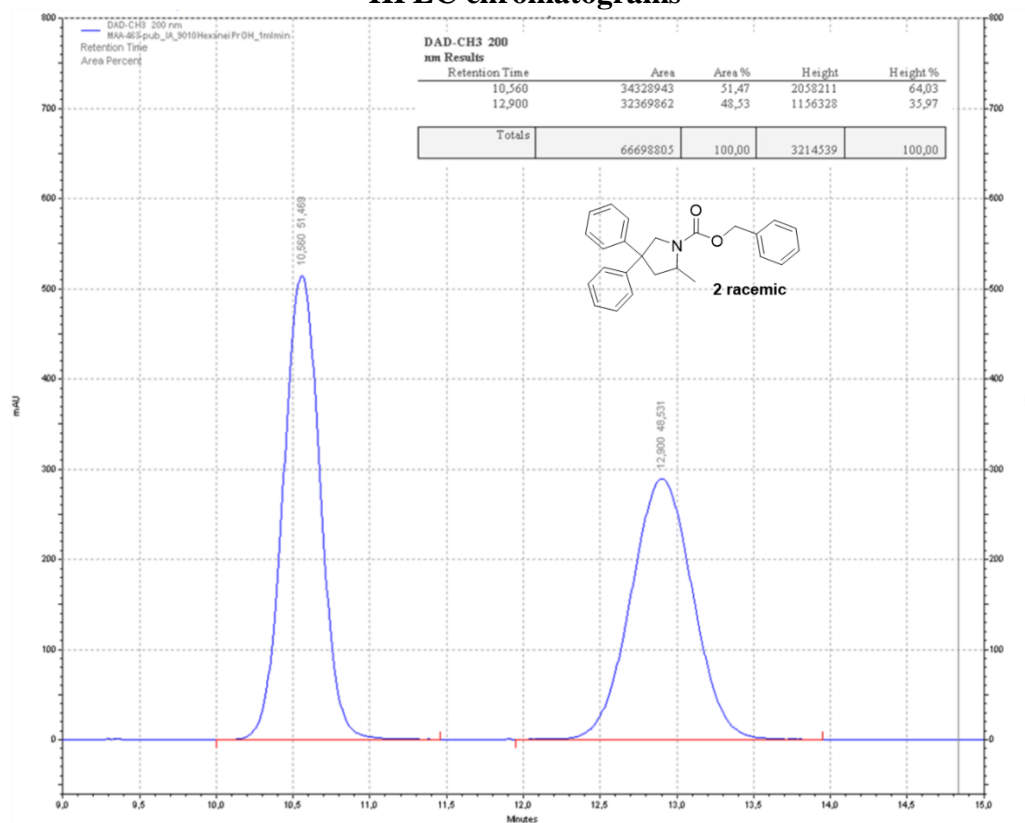

Figure S5. Chiral HPLC analysis of racemic **2**. Daicel Chiralpak™ IA chiral stationary phase (at 25°C) with (90/10) *n*-hexane/*i*PrOH, 1.0 mL/min,  $\lambda$  = 200 nm

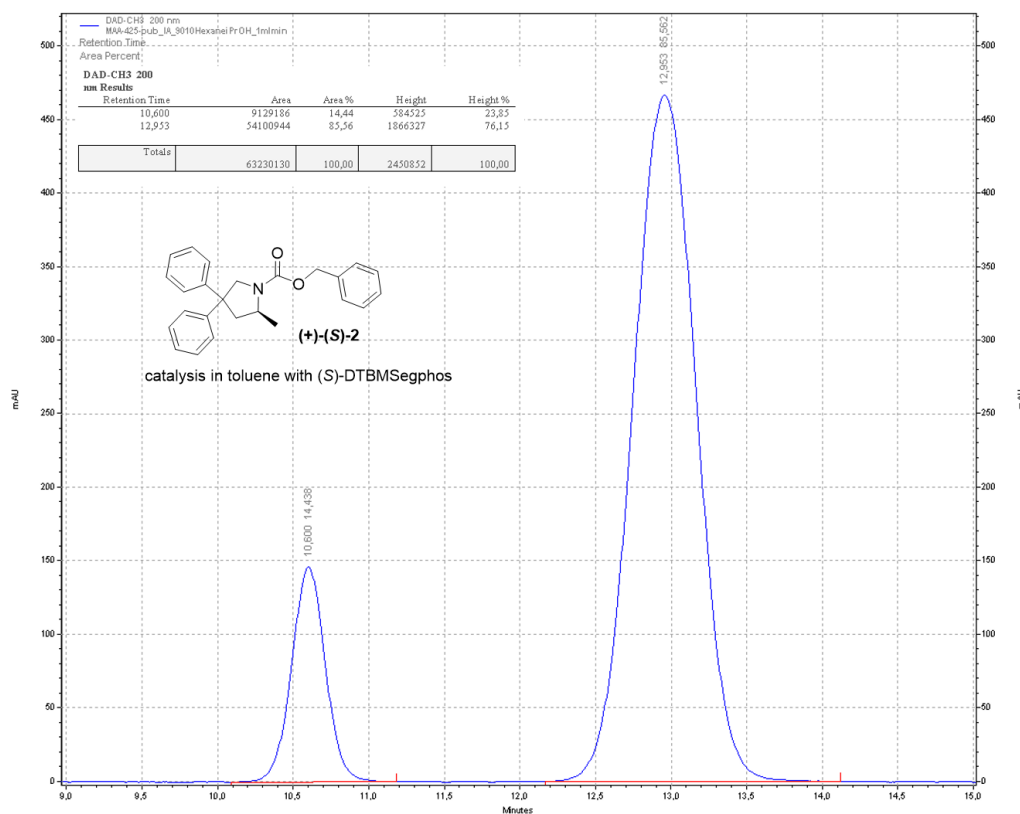

Figure S6. Chiral HPLC analysis of (+)-(S)-**2**. Daicel Chiralpak™ IA chiral stationary phase (at 25°C) with (90/10) *n*-hexane/*i*PrOH, 1.0 mL/min,  $\lambda$  = 200 nm

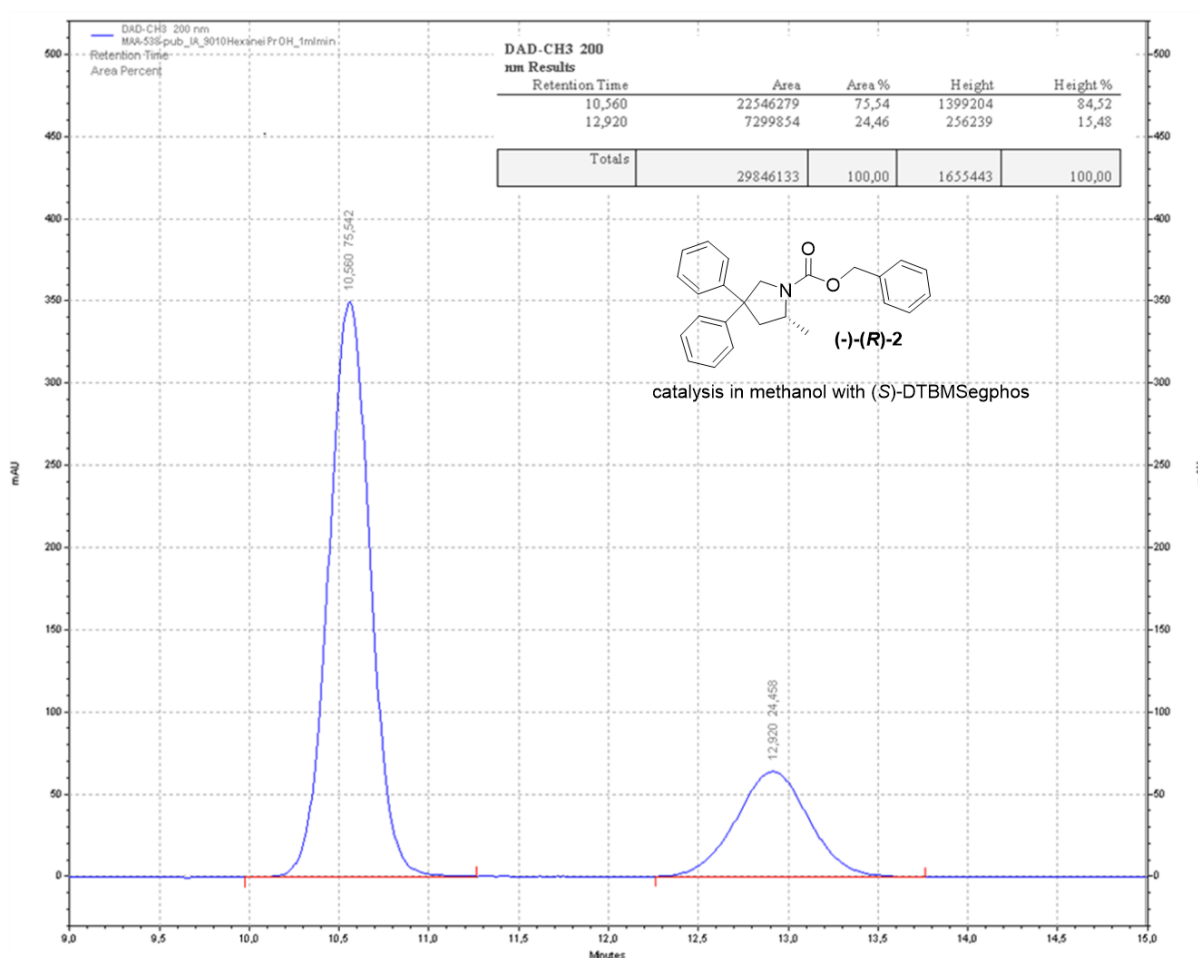

**Figure S7. Chiral HPLC analysis of (-)-(R)-2.** Daicel Chiralpak™ IA chiral stationary phase (at 25°C) with (90/10) *n*-hexane/*i*PrOH, 1.0 mL/min,  $\lambda = 200$  nm

## XYZ Coordinate

### Catalytic cycle in Toluene

#### 1. Catalyst 4a

|   |            |            |            |    |            |            |            |
|---|------------|------------|------------|----|------------|------------|------------|
| C | -0.0969404 | 0.4472033  | 0.1789876  | C  | -2.0858852 | -1.5231831 | 1.4312207  |
| C | -0.0807546 | -0.0418512 | 1.5121796  | C  | 0.9768431  | 0.5097382  | -2.1971081 |
| C | 1.1769515  | -0.2847512 | 2.0733595  | C  | 0.0154566  | -0.5937334 | -2.6996790 |
| C | 2.3518377  | -0.1288462 | 1.3346695  | O  | 7.8507947  | -2.0450019 | -1.9918636 |
| C | 2.2818376  | 0.1496261  | -0.0330086 | C  | 7.1622401  | -2.1744683 | -3.2495454 |
| C | 1.0540695  | 0.4118844  | -0.6552182 | O  | -1.2913005 | 0.9166793  | -0.3485256 |
| P | 3.9501467  | -0.3093744 | 2.2035547  | C  | -1.4846392 | 2.3295189  | -0.0833623 |
| C | 5.2126730  | -0.8206194 | 0.9800402  | Au | 3.7548022  | -1.8344341 | 3.8888138  |
| C | 5.6954505  | -2.1321183 | 0.9643511  | O  | 3.4271999  | -3.3504047 | 5.3722260  |
| C | 6.6297271  | -2.5490611 | 0.0109842  | Cl | 4.5964551  | -4.4423241 | 5.6361157  |
| C | 7.0449519  | -1.5908340 | -0.9591572 | O  | 5.3414957  | -4.0162461 | 6.8739266  |
| C | 6.7068972  | -0.2155568 | -0.8586500 | C  | 4.4600574  | 1.4050515  | 2.6665196  |
| C | 5.7430788  | 0.1224818  | 0.1027406  | C  | 5.6083213  | 1.6051776  | 3.4938496  |
| C | 7.2035656  | -3.9830610 | 0.0712411  | C  | 5.9771649  | 2.9213749  | 3.7046548  |
| C | 6.8192150  | -4.8069148 | -1.1780600 | C  | 5.2465875  | 4.0052971  | 3.1991797  |
| C | 7.3288762  | 0.9549290  | -1.6634987 | C  | 4.1211224  | 3.8239619  | 2.4219605  |
| C | 6.3257999  | 1.4531322  | -2.7275808 | C  | 3.7454835  | 2.4947406  | 2.1545112  |
| C | -1.3563001 | -0.4572862 | 2.2844809  | O  | 7.0767162  | 3.3814219  | 4.3898987  |
|   |            |            |            | C  | 6.8120224  | 4.7851957  | 4.5829657  |



O 5.8473311 5.1807164  
3.5792202  
C 6.3455972 0.4864095  
4.1340012  
C 5.9506435 -0.0807702  
5.3849713  
C 6.5972278 -1.2128626  
5.8961109  
C 7.6594595 -1.8333324  
5.2132466  
C 8.0687372 -1.2431300  
4.0344202  
C 7.4398733 -0.1008634  
3.5216910  
O 8.0192451 0.2616231  
2.3347052  
C 9.1613655 -0.6086895  
2.1790773  
O 9.0473190 -1.6591210  
3.1677745  
P 4.6050347 0.7147119  
6.3647063  
C 5.3708998 2.2051817  
7.1079516  
C 6.7328942 2.2441668  
7.3873566  
C 7.3223215 3.3254475  
8.0632461  
C 6.4818648 4.4340932  
8.3451613  
C 5.0681286 4.3846519  
8.1575189  
C 4.5464657 3.2541724  
7.5242083  
C 8.8167177 3.1604719  
8.4460269  
C 9.6914110 3.2826185  
7.1776693  
C 4.1085688 5.4794318  
8.6738923  
C 4.3684266 6.8474538  
8.0049920  
O 7.0140279 5.6035139  
8.8674710

C 7.6908908 6.4292368  
7.9056464  
Au 2.6726312 1.2822159  
5.2960718  
O 0.7566068 1.8301409  
4.5082585  
Cl 0.5302360 3.3657031  
4.0326989  
O 1.5588510 4.2224629  
4.7291535  
C 4.2377108 -0.4120187  
7.7557740  
C 3.0892412 -1.2078883  
7.7084898  
C 2.8102296 -2.1429117  
8.7061717  
C 3.7669467 -2.2802631  
9.7512468  
C 4.8375105 -1.3650787  
9.9216325  
C 5.0703895 -0.4652451  
8.8712960  
C 1.4752588 -2.9208681  
8.6802818  
C 0.6955629 -2.5879293  
9.9742584  
C 5.7572962 -1.2271918  
11.1614532  
C 7.1896914 -1.6757138  
10.7935626  
O 3.6031830 -3.3318608  
10.6360008  
C 4.4932942 -4.4338624  
10.3571288  
C 1.6732077 -4.4491631  
8.5751825  
C 0.6039193 -2.4951779  
7.4803750  
C 5.7925194 0.2702581  
11.5673287  
C 5.2943128 -1.9901004  
12.4190716  
C 4.2789614 5.6053862  
10.2058304

|   |            |            |   |   |            |            |   |
|---|------------|------------|---|---|------------|------------|---|
| C | 2.6364686  | 5.1139998  |   | H | 10.0837627 | -0.0340535 |   |
|   | 8.3946954  |            |   |   | 2.3659118  |            |   |
| C | -2.3299246 | 0.7032653  |   | H | 5.3358215  | -2.8329871 |   |
|   | 2.5806400  |            |   |   | 1.7174828  |            |   |
| C | -0.9986929 | -1.1006546 |   | H | 5.4280576  | 1.1609633  |   |
|   | 3.6403909  |            |   |   | 0.1982790  |            |   |
| C | 9.0179346  | 1.7399056  |   | H | 3.1985121  | 0.1509756  | - |
|   | 9.0382805  |            |   |   | 0.6195911  |            |   |
| C | 9.3278159  | 4.1334693  |   | H | 1.2502726  | -0.6041504 |   |
|   | 9.5288795  |            |   |   | 3.1111846  |            |   |
| C | 8.6811145  | 0.6268069  | - | H | 2.8462768  | 2.3197675  |   |
|   | 2.3304126  |            |   |   | 1.5656951  |            |   |
| C | 7.6121466  | 2.1331893  | - | H | 3.5309665  | 4.6614746  |   |
|   | 0.6925596  |            |   |   | 2.0530982  |            |   |
| C | 6.6787535  | -4.7438901 |   | H | 6.3697893  | 4.9333848  |   |
|   | 1.3039180  |            |   |   | 5.5836929  |            |   |
| C | 8.7437760  | -3.9183718 |   | H | 7.7381510  | 5.3544245  |   |
|   | 0.1985874  |            |   |   | 4.4432451  |            |   |
| C | 2.3541647  | 0.2565852  | - | H | 2.3173254  | -4.7133887 |   |
|   | 2.8423319  |            |   |   | 7.7257424  |            |   |
| C | 0.4843660  | 1.8817601  | - | H | 2.0999452  | -4.8673636 |   |
|   | 2.7046584  |            |   |   | 9.4922111  |            |   |
| O | 5.4939532  | -4.4607168 |   | H | 0.6944893  | -4.9272225 |   |
|   | 4.4231434  |            |   |   | 8.4147049  |            |   |
| O | 3.8817265  | -5.7442362 |   | H | 0.3759005  | -1.4183838 |   |
|   | 5.8464733  |            |   |   | 7.4886735  |            |   |
| O | -0.8744418 | 3.6986429  |   | H | 1.0803285  | -2.7510926 |   |
|   | 4.4392694  |            |   |   | 6.5221158  |            |   |
| O | 0.6938121  | 3.4012223  |   | H | -0.3527910 | -3.0341811 |   |
|   | 2.5360348  |            |   |   | 7.5301840  |            |   |
| H | 2.4121361  | -1.0976209 |   | H | 0.4963202  | -1.5075370 |   |
|   | 6.8640571  |            |   |   | 10.0425954 |            |   |
| H | 5.9146843  | 0.2211708  |   | H | -0.2714846 | -3.1138087 |   |
|   | 8.9352634  |            |   |   | 9.9699744  |            |   |
| H | 7.3558146  | 1.4064592  |   | H | 1.2546762  | -2.8991223 |   |
|   | 7.0741093  |            |   |   | 10.8660039 |            |   |
| H | 3.4764358  | 3.1848120  |   | H | 4.7840827  | 0.6278551  |   |
|   | 7.3316329  |            |   |   | 11.8225805 |            |   |
| H | 6.2482397  | -1.6587474 |   | H | 6.1894818  | 0.9217629  |   |
|   | 6.8259488  |            |   |   | 10.7773036 |            |   |
| H | 8.1172743  | -2.7455829 |   | H | 6.4359784  | 0.3945046  |   |
|   | 5.5928388  |            |   |   | 12.4509225 |            |   |
| H | 9.1413914  | -1.0520722 |   | H | 5.4000379  | -3.0761685 |   |
|   | 1.1749851  |            |   |   | 12.3298260 |            |   |

H 4.2469143 -1.7686326  
12.6627920  
H 5.9190269 -1.6682464  
13.2665535  
H 7.2159795 -2.7359783  
10.5027211  
H 7.8616225 -1.5408220  
11.6552457  
H 7.5923343 -1.0887675  
9.9546967  
H 4.0513262 4.6485284  
10.6997204  
H 5.3003294 5.9031173  
10.4726309  
H 3.5820379 6.3632087  
10.5959636  
H 2.4161249 5.0449044  
7.3186421  
H 2.3453028 4.1662359  
8.8717633  
H 1.9938406 5.9018212  
8.8130230  
H 4.3852448 6.7571602  
6.9079226  
H 3.5566870 7.5421343  
8.2686991  
H 5.3085835 7.2952659  
8.3427056  
H -1.8267276 1.5373798  
3.0878392  
H -2.8139930 1.0719885  
1.6701592  
H -3.1236842 0.3375680  
3.2499086  
H -0.3466940 -1.9798679  
3.5287098  
H -0.5137859 -0.3797578  
4.3149901  
H -1.9259593 -1.4390656  
4.1249958  
H -1.4343201 -2.3909268  
1.2493809  
H -2.9834828 -1.8740038  
1.9639548

H -2.3984796 -1.1094609  
0.4635203  
H 8.3787509 1.5888973  
9.9204906  
H 8.8063191 0.9368706  
8.3202339  
H 10.0649581 1.6230480  
9.3544520  
H 9.4350157 5.1636931  
9.1755825  
H 8.6668941 4.1416053  
10.4061766  
H 10.3232974 3.7960436  
9.8548094  
H 9.6288182 4.2877072  
6.7344511  
H 10.7465448 3.0911063  
7.4267741  
H 9.3807755 2.5606114  
6.4085080  
H 9.3857531 0.1855526 -  
1.6111865  
H 8.5959901 -0.0586588 -  
3.1791564  
H 9.1206367 1.5630292 -  
2.7058271  
H 6.6980165 2.5729041 -  
0.2708649  
H 8.2472104 1.8157845  
0.1460862  
H 8.1305637 2.9336662 -  
1.2403374  
H 5.3902469 1.7895417 -  
2.2563234  
H 6.7519428 2.3057776 -  
3.2788418  
H 6.0704619 0.6712284 -  
3.4562995  
H 6.9151854 -4.2292798  
2.2463097  
H 5.5916916 -4.9083101  
1.2668608  
H 7.1581035 -5.7325821  
1.3399939

H 9.1981990 -3.3732505 -  
 0.6376513  
 H 9.0312841 -3.4383823  
 1.1459771  
 H 9.1549715 -4.9397185  
 0.2084456  
 H 7.3385660 -4.4553636 -  
 2.0758012  
 H 7.1005532 -5.8592069 -  
 1.0200714  
 H 5.7340904 -4.7722200 -  
 1.3576292  
 H 3.0834579 1.0395370 -  
 2.5850435  
 H 2.7761919 -0.7186237 -  
 2.5564792  
 H 2.2392478 0.2609200 -  
 3.9358590  
 H -0.5791524 2.0334392 -  
 2.4930696  
 H 1.0597358 2.7056698 -  
 2.2559687  
 H 0.6161611 1.9338097 -  
 3.7963643  
 H -0.9970811 -0.4457486 -  
 2.3035919  
 H -0.0352649 -0.5717729 -  
 3.7994319  
 H 0.3699020 -1.5886929 -  
 2.3920653  
 H 4.2202245 -5.2327657  
 11.0572504  
 H 4.3767228 -4.7810718  
 9.3198094  
 H 5.5459755 -4.1513075  
 10.5166101  
 H 8.0908207 7.2862624  
 8.4612854  
 H 8.5206758 5.8952993  
 7.4176021  
 H 6.9937041 6.7904204  
 7.1328806  
 H 7.8674831 -2.6571313 -  
 3.9371786

H 6.2622668 -2.8000263 -  
 3.1435937  
 H 6.8699548 -1.1953531 -  
 3.6576785  
 H -0.7526885 2.9366274 -  
 0.6351834  
 H -2.4983593 2.5673480 -  
 0.4278267  
 H -1.3857414 2.5520318  
 0.9867158

## 2. Int 1

C 2.6308718 17.3682521  
 5.3977062  
 C 2.0246056 16.4153499  
 6.2153270  
 C 2.5026921 16.1985729  
 7.5111963  
 C 3.6631710 16.8430491  
 7.9612361  
 C 4.3555434 17.6738717  
 7.0329451  
 C 3.7903786 18.0543543  
 5.7863717  
 P 0.6910602 15.3855884  
 5.5013454  
 Au -0.3397245 13.8432859  
 6.8996363  
 C -1.2760395 11.9397789  
 7.7047845  
 C 0.0769328 11.7165066  
 7.8730333  
 C 0.9984571 11.0358181  
 6.8961695  
 C 1.8589615 9.8848890  
 7.5042749  
 C 0.9844774 8.5973295  
 7.6191653  
 N -0.3086180 8.7468308  
 8.2662120  
 C -1.5248313 8.8197063  
 7.6511266

O -1.3909847 8.9352438  
6.2919060  
C -2.6349226 8.9688777  
5.5205588  
C -2.9869311 7.5988953  
5.0110269  
C -3.7793797 6.7358379  
5.7837200  
C -4.0791000 5.4512081  
5.3231661  
C -3.5909796 5.0175059  
4.0854208  
C -2.8025655 5.8728131  
3.3084672  
C -2.5039299 7.1573434  
3.7704078  
C 4.1255821 16.6745464  
9.4266492  
C 5.4694553 15.9165555  
9.5157940  
O 5.5995321 18.1506860  
7.4156736  
C 6.7017611 17.4653296  
6.7940590  
C 4.3148141 19.1508447  
4.8224764  
C 5.0056143 18.4939062  
3.6058916  
C -0.3929114 16.5515696  
4.5731411  
C -1.1096837 17.5545275  
5.3042633  
C -1.8343945 18.4461445  
4.5315149  
C -1.9469026 18.3308595  
3.1386205  
C -1.2933357 17.3421317  
2.4329790  
C -0.4966286 16.4573729  
3.1815783  
O -2.5063707 19.5675697  
4.9554262  
C -3.3289965 19.9366585  
3.8318609

O -2.7292611 19.3502385  
2.6533715  
C -1.0599156 17.6630929  
6.7900616  
C -1.8808961 16.8915072  
7.6755824  
C -1.6659238 16.9121417  
9.0574729  
C -0.6895671 17.7334866  
9.6474474  
C 0.0202343 18.5539926  
8.7965353  
C -0.1642946 18.5204733  
7.4081822  
O 0.9860659 19.4731632  
9.1158817  
C 1.5033230 19.9592989  
7.8559691  
O 0.6661999 19.4283185  
6.8035544  
P -3.3490512 16.0086178  
7.0045040  
Au -2.9584083 14.5024613  
5.3453363  
O -2.7013973 13.0401076  
3.8012476  
Cl -3.6018835 13.3185286  
2.4662574  
O -3.6262982 12.0043466  
1.7492528  
C -4.2155658 15.2246722  
8.4080457  
C -4.4103508 13.8413271  
8.4440722  
C -4.9789806 13.2173620  
9.5571746  
C -5.2839147 14.0408317  
10.6748789  
C -5.3092240 15.4547146  
10.5796431  
C -4.7336224 16.0155270  
9.4325898  
C -5.9269410 16.4449386  
11.5960433

C -4.8052762 17.3010992  
12.2255430  
O -5.5728902 13.4151140  
11.8741827  
C -4.4480206 13.4334627  
12.7841789  
C -5.2647369 11.7020295  
9.5379408  
C -6.7382418 11.4534767  
9.9361977  
C -4.4899538 17.3412669  
6.4626489  
C -4.4729989 18.5736057  
7.1083460  
C -5.4416810 19.5579847  
6.8646818  
C -6.4116183 19.2673248  
5.8639005  
C -6.4868229 17.9903418  
5.2285556  
C -5.4963933 17.0524996  
5.5396482  
C -5.3558996 20.8595306  
7.7010192  
C -4.5117056 21.9122311  
6.9438798  
O -7.4045830 20.1771863  
5.5332870  
C -7.0707956 21.2895150  
4.6893551  
C -7.6179913 17.5938917  
4.2513564  
C -7.5714719 18.4500877  
2.9657882  
C -4.6318184 20.6024241  
9.0462951  
C -6.7457057 21.4167128  
8.0786647  
C -8.9910979 17.7459507  
4.9463808  
C -7.4930862 16.1209668  
3.8102768  
C -6.8974102 17.3731494  
10.8193999

C -6.7669664 15.8061196  
12.7198280  
C -5.0771540 11.1227977  
8.1220057  
C -4.3234772 10.9339794  
10.4936146  
C 1.5687387 14.3298387  
4.2622752  
C 2.9608765 14.3911457  
4.1624697  
C 3.6715287 13.5938164  
3.2606142  
C 2.9159069 12.7361042  
2.4155377  
C 1.5244774 12.5189509  
2.6123151  
C 0.8730361 13.3636208  
3.5295677  
C 5.2164748 13.6765901  
3.2355212  
C 5.8333272 12.2699280  
3.3932082  
O 3.6053359 12.0768172  
1.4090660  
C 3.4148667 12.6409490  
0.0992085  
C 0.6564709 11.4436989  
1.9051703  
C -0.2036870 12.1259357  
0.8182556  
C 5.7475348 14.5336726  
4.4038117  
C 5.7231790 14.3250999  
1.9283466  
C 1.4425571 10.2681819  
1.2874613  
C -0.2988448 10.7928995  
2.9388828  
O -2.9029635 14.3930691  
1.6776396  
O -4.9669241 13.7637095  
2.9236165  
C 3.0008211 9.4844315  
6.5532192

|    |            |            |   |            |            |
|----|------------|------------|---|------------|------------|
| C  | 3.0205265  | 9.8313473  | H | -3.6838042 | 18.7702807 |
|    | 5.1947405  |            |   | 7.8300859  |            |
| C  | 4.0309423  | 9.3610875  | H | -5.5068537 | 16.0718673 |
|    | 4.3492816  |            |   | 5.0649625  |            |
| C  | 5.0415434  | 8.5358106  | H | -2.2488452 | 16.2559954 |
|    | 4.8447060  |            |   | 9.7023256  |            |
| C  | 5.0377345  | 8.1876518  | H | -0.5039346 | 17.6999747 |
|    | 6.1994384  |            |   | 10.7201532 |            |
| C  | 4.0291033  | 8.6583489  | H | 2.5326472  | 19.5888229 |
|    | 7.0413947  |            |   | 7.7214795  |            |
| C  | 2.4578607  | 10.3575258 | H | 1.4495381  | 21.0564045 |
|    | 8.8367758  |            |   | 7.8409783  |            |
| C  | 3.2875097  | 11.4940378 | H | 1.9574227  | 15.5253611 |
|    | 8.8344717  |            |   | 8.1740259  |            |
| C  | 3.8366520  | 11.9896880 | H | 2.1903996  | 17.5737992 |
|    | 10.0152473 |            |   | 4.4216221  |            |
| C  | 3.5681556  | 11.3593912 | H | 3.5028552  | 15.0825494 |
|    | 11.2345639 |            |   | 4.7994146  |            |
| C  | 2.7617359  | 10.2228305 | H | -0.2035152 | 13.2586228 |
|    | 11.2520564 |            |   | 3.6751717  |            |
| C  | 2.2154628  | 9.7259117  | H | 0.0420639  | 15.6703656 |
|    | 10.0628796 |            |   | 2.6549197  |            |
| O  | -2.5950572 | 8.8219866  | H | -1.3879304 | 17.2465953 |
|    | 8.2494461  |            |   | 1.3521311  |            |
| C  | 3.0922672  | 15.8834798 | H | -4.3391567 | 19.5117881 |
|    | 10.2484149 |            |   | 3.9705597  |            |
| C  | 4.2628933  | 18.0671453 | H | -3.3400922 | 21.0280135 |
|    | 10.0869714 |            |   | 3.7309823  |            |
| C  | 5.2691889  | 20.1724906 | H | -3.2742255 | 11.2191236 |
|    | 5.4746630  |            |   | 10.3324704 |            |
| C  | 3.1122051  | 19.9745128 | H | -4.5788849 | 11.1235265 |
|    | 4.2924062  |            |   | 11.5423977 |            |
| O  | 0.3322676  | 14.4333112 | H | -4.4082380 | 9.8539438  |
|    | 9.5627631  |            |   | 10.3045217 |            |
| Cl | -0.4265513 | 13.9934663 | H | -5.6929701 | 11.6487263 |
|    | 10.8239894 |            |   | 7.3767189  |            |
| O  | 0.1476041  | 12.6735667 | H | -4.0281644 | 11.1440116 |
|    | 11.3099567 |            |   | 7.8000376  |            |
| O  | -0.2838488 | 15.0677564 | H | -5.3762355 | 10.0654466 |
|    | 11.8885507 |            |   | 8.1287258  |            |
| O  | -1.9008791 | 13.8122501 | H | -7.4201738 | 11.9547078 |
|    | 10.4682081 |            |   | 9.2321031  |            |
| H  | -4.6820712 | 17.1006199 | H | -6.9488459 | 11.8180352 |
|    | 9.3434788  |            |   | 10.9483925 |            |

H -7.7173799 16.7912784  
10.3731575  
H -6.4049299 17.9279259  
10.0099445  
H -7.3343529 18.1099096  
11.5103937  
H -6.1630024 15.2597852  
13.4519269  
H -7.5217787 15.1163499  
12.3193974  
H -7.2893003 16.6118100  
13.2586655  
H -4.0772086 16.6753804  
12.7622265  
H -5.2331490 18.0212535  
12.9403138  
H -4.2528066 17.8698760  
11.4622868  
H -9.0408920 17.1062261  
5.8401456  
H -9.1820158 18.7818601  
5.2483869  
H -9.7887373 17.4283727  
4.2571152  
H -6.5699362 15.9209798  
3.2465102  
H -7.5348674 15.4272612  
4.6632946  
H -8.3382824 15.8802841  
3.1497821  
H -6.5748276 18.4060282  
2.5000064  
H -8.2977590 18.0575413  
2.2379397  
H -7.8271525 19.4972959  
3.1535128  
H -0.8161899 12.9330974  
1.2413119  
H 0.4165983 12.5589363  
0.0206868  
H -0.8867250 11.3943891  
0.3609714  
H 0.2653658 10.2718234  
3.7259519

H -0.9903421 11.5025287  
3.4057350  
H -0.9179860 10.0464808  
2.4196276  
H 2.1295786 9.8160583  
2.0154899  
H 0.7201539 9.4952795  
0.9855868  
H 2.0205312 10.5390460  
0.3987939  
H -5.1098793 19.7929538  
9.6173142  
H -3.5662095 20.3613563  
8.9255210  
H -4.6836615 21.5164352  
9.6543406  
H -7.3344711 21.7530602  
7.2212967  
H -7.3359853 20.6510533  
8.6040840  
H -6.6164834 22.2713879  
8.7594095  
H -4.9441400 22.1865808  
5.9742218  
H -4.4285163 22.8298904  
7.5462489  
H -3.4977071 21.5257340  
6.7624739  
H 4.8403506 20.5890530  
6.3968017  
H 6.2514953 19.7576108  
5.7208685  
H 5.4282029 21.0016574  
4.7687811  
H 2.4124930 19.3794989  
3.6911354  
H 2.5427784 20.4279936  
5.1150440  
H 3.4873376 20.7828417  
3.6476444  
H 4.3227052 17.8028380  
3.0888568  
H 5.3167782 19.2671466  
2.8869049



H 5.9006502 17.9258218  
3.8963157  
H 4.9988868 18.6939301  
9.5692263  
H 3.2920926 18.5845146  
10.0953784  
H 4.5860813 17.9453455  
11.1323530  
H 6.3091400 16.5206547  
9.1555055  
H 5.6717193 15.6568124  
10.5663372  
H 5.4343460 14.9805338  
8.9377080  
H 5.4361676 15.5849604  
4.3287263  
H 5.4233501 14.1453657  
5.3813467  
H 6.8470040 14.5140264  
4.3853060  
H 5.5503980 13.6798101  
1.0607864  
H 5.2342425 15.2954804  
1.7510879  
H 6.8074008 14.5013451  
2.0018141  
H 5.5403602 11.6074259  
2.5712707  
H 6.9315176 12.3488312  
3.4032426  
H 5.5166253 11.8079641  
4.3394440  
H -4.7248156 12.7817588  
13.6218087  
H -3.5384105 13.0642851  
12.2892072  
H -4.2531673 14.4508026  
13.1584817  
H -7.9681625 21.5186258  
4.0987288  
H -6.8074632 22.1790220  
5.2817097  
H -6.2434328 21.0465792  
4.0065302

H 7.6091120 17.8298876  
7.2909833  
H 6.6172651 16.3759184  
6.9299347  
H 6.7655217 17.6860948  
5.7175636  
H 4.1619643 12.1682894 -  
0.5506086  
H 2.4093205 12.4308046 -  
0.2949470  
H 3.5711394 13.7308880  
0.1111481  
H 2.5432020 9.7195037  
12.1956450  
H 1.6043150 8.8240332  
10.1155167  
H -4.1509123 7.0783533  
6.7520077  
H -3.4316589 9.3778620  
6.1556673  
H -1.8669654 12.3014480  
8.5501881  
H -2.4245719 9.6625138  
4.6965501  
H -4.6985593 4.7872791  
5.9295977  
H -0.3679731 8.7354329  
9.2797941  
H 4.0471601 8.3951278  
8.1012951  
H 3.9834167 11.7552251  
12.1629867  
H 5.8264758 7.5503468  
6.6048214  
H 2.2546779 10.4835720  
4.7745367  
H 5.8308051 8.1733288  
4.1832062  
H 1.5572883 7.8168731  
8.1415308  
H 4.0313174 9.6567897  
3.2986926  
H -3.8280794 4.0144631  
3.7251553

H -1.8897849 7.8272054  
 3.1629045  
 H 4.4754707 12.8742257  
 9.9866641  
 H -2.4242647 5.5404508  
 2.3397057  
 H 0.4264924 10.6719994  
 6.0317312  
 H 1.7061236 11.7931947  
 6.5212439  
 H 2.9712060 14.8471425  
 9.9047097  
 H 3.4255766 15.8445009  
 11.2956413  
 H 2.0969942 16.3475698  
 10.2349270  
 H 3.5110272 11.9950158  
 7.8889863  
 H 0.5134570 11.9894723  
 8.8396650  
 H -4.0963244 13.2457514  
 7.5879437  
 H 0.8039656 8.2302149  
 6.6020027  
 H -6.9494931 10.3736660  
 9.9037934  
 H -1.8058943 11.5299536  
 6.8414408

### 3. Int 2a

C -3.9122636 17.3214055  
 5.0445704  
 C -4.2435271 16.4034781  
 6.0437739  
 C -5.5587156 15.9368375  
 6.1307068  
 C -6.5323986 16.2970995  
 5.1943562  
 C -6.1306303 17.1427657  
 4.1251617  
 C -4.8496257 17.7560158  
 4.0919957  
 P -3.0721089 16.1221450  
 7.4449418

C -1.6644023 15.0840781  
 6.8632470  
 C -0.6504370 14.7408574  
 7.8170726  
 C 0.3617965 13.9242574  
 7.3435812  
 C 0.4470045 13.5229907  
 6.0027938  
 C -0.5015467 13.8847432  
 5.0688372  
 C -1.5743017 14.6702063  
 5.5314553  
 O 1.5488333 12.7169921  
 5.8328125  
 C 2.3000786 12.8682874  
 7.0580999  
 O 1.3897474 13.3607850  
 8.0619666  
 C -0.7011353 15.1996730  
 9.2349352  
 C -0.2536940 16.4861993  
 9.6764141  
 C -0.5084812 16.9318831  
 10.9791470  
 C -1.1564990 16.1200632  
 11.9282066  
 C -1.4949647 14.8444667  
 11.5228513  
 C -1.2695273 14.4004711  
 10.2138067  
 O -1.7056221 13.1083849  
 10.0757942  
 C -2.3545420 12.7754925  
 11.3226764  
 O -2.0939809 13.8527804  
 12.2548706  
 P 0.8008794 17.4946668  
 8.5540007  
 C 2.3792150 16.5577521  
 8.4555882  
 C 2.8805593 15.8844889  
 9.5728272  
 C 4.1286278 15.2577225  
 9.5445719

C 4.8519169 15.2869766  
8.3151224  
C 4.4201858 16.0549185  
7.2011317  
C 3.1466608 16.6400607  
7.2980337  
C 4.6922927 14.6247637  
10.8371228  
C 6.0324102 15.3106047  
11.1919250  
O 6.0415104 14.5728291  
8.2654085  
C 5.9801323 13.3425596  
7.5264348  
C 5.2067332 16.3388273  
5.8941333  
C 5.0158911 17.8317641  
5.5123116  
C -7.9913006 15.8237584  
5.3927089  
C -8.4576473 14.8978793  
4.2475097  
O -7.0701527 17.3974610  
3.1351603  
C -6.8221606 16.6999491  
1.9016548  
C -4.4062398 18.9066036  
3.1504285  
C -3.5979980 19.9355070  
3.9859565  
C -4.0247643 15.0125577  
8.5565176  
C -4.2665515 13.6918155  
8.1865891  
C -5.1343723 12.8610636  
8.9130495  
C -5.8160630 13.4595421  
10.0057356  
C -5.4562351 14.7412546  
10.5126516  
C -4.5734336 15.5072066  
9.7430396  
C -5.9678478 15.2773490  
11.8682882

C -5.6565697 14.2508624  
12.9829318  
O -6.8414381 12.7841049  
10.6511857  
C -8.0900444 12.8229819  
9.9361220  
C -5.2382963 11.3846743  
8.4490184  
C -3.8077697 10.8470124  
8.1831674  
Au -2.6594294 18.2608510  
8.3438925  
Au 0.0178017 17.9231888  
6.4593363  
O -0.5530401 18.4242080  
4.4589238  
Cl 0.2870472 17.7157372  
3.2566581  
O 1.6875457 17.4596062  
3.7588613  
C -2.6761765 20.1794701  
9.2121001  
C -4.0976160 20.6498498  
9.1548229  
C -5.1564494 19.7662503  
9.8060712  
C -6.3905676 20.6786977  
9.9814825  
C -5.6980002 21.8859722  
10.6557636  
N -4.3637906 22.0216026  
9.9476781  
C -6.9793825 21.0684123  
8.6115937  
C -6.9026850 20.2003308  
7.5079178  
C -7.4494375 20.5503846  
6.2715712  
C -8.0925924 21.7788176  
6.1086555  
C -8.1927178 22.6461232  
7.1981669  
C -7.6453940 22.2912909  
8.4339096

C -7.4456191 20.0526606  
10.9033121  
C -8.7212396 19.7089205  
10.4304231  
C -9.6635417 19.1089777  
11.2724413  
C -9.3513794 18.8485871  
12.6081606  
C -8.0816207 19.1808150  
13.0902356  
C -7.1380755 19.7701359  
12.2471726  
C -4.2537095 23.2742694  
9.1564640  
O -4.8644788 24.2738141  
9.4493835  
O -3.3870755 23.1007476  
8.1701088  
C -3.2031033 24.2638031  
7.2655155  
C -4.3012434 24.3356317  
6.2465624  
C -5.2927914 25.3228730  
6.3294359  
C -6.3034435 25.3873807  
5.3669707  
C -6.3371013 24.4569786  
4.3247081  
C -5.3583820 23.4608154  
4.2440011  
C -4.3408501 23.4057174  
5.1962652  
C -7.4841490 15.5691751  
11.8327926  
C -5.2569075 16.5900920  
12.2479185  
C -6.0321546 11.3110861  
7.1250064  
C -5.8616774 10.4210885  
9.4800675  
C 1.2143288 19.0521376  
9.4275507  
C 0.8516293 20.2794250  
8.8648027

C 1.1354459 21.4880781  
9.5057072  
C 1.7589275 21.4224597  
10.7836274  
C 2.2946771 20.2116257  
11.2921731  
C 1.9698659 19.0376522  
10.5988138  
C 0.8410188 22.8273196  
8.7956167  
C -0.1905338 23.6820357  
9.5642378  
O 1.8835595 22.5972027  
11.4999182  
C 0.9267799 22.7250596  
12.5773666  
C 3.2282357 20.0451419  
12.5178046  
C 3.8219397 21.3488961  
13.0900725  
O 0.2491175 18.7029810  
2.1299671  
O -0.4244439 16.4356073  
2.9129521  
C 2.4650429 19.3005989  
13.6366628  
C 4.4462411 19.1884468  
12.0826402  
C 2.1646774 23.6142739  
8.6522227  
C 0.2899601 22.5974534  
7.3738667  
C 4.9054115 13.1011967  
10.6962971  
C 3.7369338 14.8336175  
12.0304627  
C 4.6277622 15.4817556  
4.7446224  
C 6.7312431 16.1275594  
5.9999873  
C -8.9240896 17.0531686  
5.4841078  
C -8.1522247 15.0331312  
6.7077094

|    |            |            |   |            |            |
|----|------------|------------|---|------------|------------|
| C  | -3.4814398 | 18.3542975 | H | -1.0745408 | 23.0885895 |
|    | 2.0437122  |            |   | 9.8355633  |            |
| C  | -5.5636001 | 19.7059589 | H | 0.2369443  | 24.1023975 |
|    | 2.5160885  |            |   | 10.4797615 |            |
| O  | -2.5792504 | 22.1794915 | H | -0.5151866 | 24.5230751 |
|    | 11.9567518 |            |   | 8.9317749  |            |
| Cl | -2.4498052 | 20.9781263 | H | 0.9742411  | 22.0022467 |
|    | 12.9570329 |            |   | 6.7517514  |            |
| O  | -2.2129050 | 21.5477783 | H | -0.6918432 | 22.0996086 |
|    | 14.3302083 |            |   | 7.3809995  |            |
| O  | -1.2920092 | 20.1102547 | H | 0.1672502  | 23.5741954 |
|    | 12.5200446 |            |   | 6.8827005  |            |
| O  | -3.7518127 | 20.1916378 | H | 2.8949749  | 23.0417156 |
|    | 12.9025218 |            |   | 8.0607824  |            |
| H  | 2.3316860  | 18.0853870 | H | 2.6022956  | 23.8356906 |
|    | 10.9836206 |            |   | 9.6332301  |            |
| H  | 2.2720136  | 15.8343766 | H | 5.0084444  | 19.6887407 |
|    | 10.4734079 |            |   | 11.2801746 |            |
| H  | 2.7428766  | 17.1840544 | H | 4.1650385  | 18.1905846 |
|    | 6.4433166  |            |   | 11.7209144 |            |
| H  | -0.2217190 | 17.9408095 | H | 5.1214073  | 19.0471929 |
|    | 11.2739242 |            |   | 12.9401612 |            |
| H  | -1.3696076 | 16.4853240 | H | 3.0838192  | 21.9677245 |
|    | 12.9323347 |            |   | 13.6103228 |            |
| H  | -3.4410317 | 12.6978907 | H | 4.2898318  | 21.9593055 |
|    | 11.1561337 |            |   | 12.3065431 |            |
| H  | -1.9244898 | 11.8449632 | H | 4.5969221  | 21.0790104 |
|    | 11.7170639 |            |   | 13.8236430 |            |
| H  | -4.2990003 | 16.5126470 | H | 1.5715844  | 19.8575528 |
|    | 10.0605288 |            |   | 13.9547819 |            |
| H  | -3.7673875 | 13.3000322 | H | 3.1175121  | 19.1627622 |
|    | 7.2998314  |            |   | 14.5124408 |            |
| H  | -5.8307172 | 15.2868174 | H | 2.1307074  | 18.3068113 |
|    | 6.9561514  |            |   | 13.3021251 |            |
| H  | -2.9060262 | 17.7407453 | H | 7.1483261  | 16.6496024 |
|    | 5.0235033  |            |   | 6.8723519  |            |
| H  | -2.3431235 | 14.9773791 | H | 7.0270223  | 15.0757977 |
|    | 4.8220486  |            |   | 6.0617492  |            |
| H  | -0.4228200 | 13.5893819 | H | 7.2009159  | 16.5451084 |
|    | 4.0236318  |            |   | 5.0970138  |            |
| H  | 3.0963128  | 13.6154197 | H | 3.9834271  | 18.0766667 |
|    | 6.9017436  |            |   | 5.2321003  |            |
| H  | 2.6915586  | 11.8922725 | H | 5.3197843  | 18.4926293 |
|    | 7.3686717  |            |   | 6.3375696  |            |

H 5.6444411 18.0604163  
4.6390901  
H 3.5575310 15.6879010  
4.5969282  
H 5.1486448 15.7167952  
3.8035651  
H 4.7445472 14.4037690  
4.9303439  
H -2.6434720 17.7901219  
2.4732047  
H -4.0186721 17.6847518  
1.3566463  
H -3.0627536 19.1822387  
1.4518999  
H -4.1755951 20.2672970  
4.8624734  
H -2.6324862 19.5440516  
4.3260064  
H -3.3812259 20.8124036  
3.3575186  
H -6.2674328 20.0673556  
3.2796800  
H -5.1350659 20.5833774  
2.0080021  
H -6.1336101 19.1439999  
1.7705595  
H 3.5485768 15.8985276  
12.2335979  
H 2.7694696 14.3289537  
11.8851191  
H 4.1996948 14.4070699  
12.9317181  
H 6.7767669 15.1660534  
10.3999832  
H 5.8871428 16.3910851  
11.3426299  
H 6.4302807 14.8876067  
12.1272917  
H 5.7425556 12.8669822  
10.0313206  
H 5.1356619 12.6702988  
11.6828097  
H 3.9966618 12.6090405  
10.3175348

H -5.3841379 10.5215288  
10.4647720  
H -6.9392051 10.5613865  
9.6122851  
H -5.7051025 9.3893693  
9.1302450  
H -3.2824483 11.3896448  
7.3868743  
H -3.1889002 10.9027738  
9.0894560  
H -3.8704345 9.7927724  
7.8754172  
H -5.5654851 11.9341714  
6.3475187  
H -6.0616947 10.2732888  
6.7586570  
H -7.0694659 11.6534900  
7.2514132  
H -6.1370848 13.2841848  
12.7897869  
H -4.5707742 14.1002137  
13.0760596  
H -6.0260341 14.6344047  
13.9464582  
H -8.0747989 14.6500818  
11.7594155  
H -7.7789692 16.0862142  
12.7580110  
H -7.7421678 16.2317347  
10.9927637  
H -7.5642752 14.1028495  
6.7098319  
H -7.8626286 15.6269491  
7.5879702  
H -9.2098837 14.7562224  
6.8275036  
H -8.5628047 15.4403555  
3.3025827  
H -7.7532723 14.0652784  
4.1013105  
H -9.4409570 14.4697954  
4.4979366  
H -8.8821476 17.6560809  
4.5694351

H -9.9634321 16.7212796  
5.6343870  
H -8.6455175 17.6893786  
6.3373162  
H 1.1944145 23.6444543  
13.1120586  
H -0.0970053 22.8002597  
12.1855939  
H 0.9725814 21.8680772  
13.2643389  
H 5.7022042 13.5056045  
6.4745305  
H 6.9865223 12.9083204  
7.5690990  
H 5.2628520 12.6408470  
7.9815618  
H -8.8310946 12.3397556  
10.5846762  
H -8.3964255 13.8610481  
9.7324542  
H -8.0313521 12.2774148  
8.9817842  
H -7.7015235 16.8723924  
1.2685335  
H -5.9264949 17.0805812  
1.3886910  
H -6.6986044 15.6195797  
2.0770185  
H -7.8162084 18.9742127  
14.1290278  
H -6.1465768 19.9924366  
12.6475720  
H -5.2722635 26.0362622  
7.1558866  
H -3.1464476 25.1706671  
7.8805167  
H -2.3061900 20.0623563  
10.2389829  
H -2.2287462 24.0552762  
6.8111381  
H -7.0688991 26.1628455  
5.4349031  
H -3.6027863 22.0658671  
10.7138321

H -7.7508785 22.9853839  
9.2694742  
H -10.0880659 18.3858859  
13.2677773  
H -8.6903945 23.6113665  
7.0875255  
H -6.4063591 19.2323488  
7.5940294  
H -8.5060695 22.0607819  
5.1389941  
H -5.4702491 21.6684972  
11.7038590  
H -7.3644284 19.8555735  
5.4338056  
H -7.1307971 24.5038184  
3.5762356  
H -3.5708303 22.6336124  
5.1274792  
H -10.6483350 18.8500254  
10.8779481  
H -5.3868076 22.7275517  
3.4361570  
H -5.3521601 18.8764893  
9.1977499  
H -4.7987989 19.4253748  
10.7878468  
H -5.5175349 17.4128368  
11.5687450  
H -5.5805789 16.8940248  
13.2531093  
H -4.1625109 16.4842298  
12.2662567  
H -8.9852567 19.9126029  
9.3923369  
H 0.3331458 20.2757843  
7.9074274  
H -6.2333339 22.8366798  
10.6008002  
H 1.9774789 24.5673829  
8.1325259  
H -2.0080793 20.8593504  
8.6705844  
H -4.3905939 20.8913173  
8.1265427

#### 4. Int 2b

C 0.0012447 0.0087320  
0.0107178  
C -0.0062726 0.0028245  
1.4028725  
C 1.2024122 0.0039525  
2.1026513  
C 2.4297370 -0.0887107  
1.4384413  
C 2.3916298 -0.2337997  
0.0213460  
C 1.1940143 -0.0714759 -  
0.7265960  
P -1.5807348 -0.1093666  
2.3352298  
Au -1.4062939 -0.0018669  
4.6803861  
C -1.2862777 -0.4290349  
6.7358330  
C -0.2712670 -1.5187228  
6.9329043  
C -0.3698987 -2.7854795  
6.0914787  
C 0.5561294 -3.8278602  
6.7704062  
C 0.3759303 -3.5128522  
8.2853704  
N -0.2412407 -2.1239080  
8.3986745  
C 0.1452037 -5.2774869  
6.5019785  
C -0.7246111 -5.6333457  
5.4626921  
C -1.0450446 -6.9753282  
5.2252984  
C -0.5070435 -7.9812922  
6.0289975  
C 0.3637828 -7.6383475  
7.0693582  
C 0.6914076 -6.3015321  
7.2955062

C 2.0045495 -3.5974915  
6.2949062  
C 2.4517147 -4.2259411  
5.1185356  
C 3.7397616 -4.0048001  
4.6302911  
C 4.6105764 -3.1414711  
5.3036853  
C 4.1735497 -2.4961846  
6.4599128  
C 2.8852560 -2.7274495  
6.9540842  
C -1.5366523 -2.2438328  
9.1162372  
O -2.4439983 -2.7686361  
8.3012022  
C -3.6788454 -3.3030672  
8.9298980  
C -3.4210036 -4.7261996  
9.3249398  
C -3.1546273 -5.0595580  
10.6610060  
C -2.8344597 -6.3758404  
11.0058663  
C -2.7673935 -7.3617963  
10.0167437  
C -3.0274112 -7.0338940  
8.6814064  
C -3.3552476 -5.7226494  
8.3373017  
C 3.7466657 0.0344206  
2.2375515  
C 4.6239488 -1.2314779  
2.1269381  
O 3.5916161 -0.4964290 -  
0.6233583  
C 3.7475761 -1.8754439 -  
1.0048055  
C 1.0699020 0.0268998 -  
2.2697969  
C 0.4889931 -1.2947713 -  
2.8221135  
C -2.7523329 0.9890135  
1.4338533



C -2.5295332 2.4026556  
1.5034881  
C -3.4172927 3.1833885  
0.7841438  
C -4.5178197 2.6453202  
0.1023461  
C -4.7652177 1.2887896  
0.0669364  
C -3.8469343 0.4628121  
0.7416900  
O -3.3709740 4.5435521  
0.5891827  
C -4.6644209 4.8705946  
0.0418712  
O -5.2138250 3.6563000 -  
0.5179088  
C -1.3990181 2.9942569  
2.2736396  
C -1.4406451 3.2569824  
3.6797830  
C -0.2881458 3.6426580  
4.3736525  
C 0.9411671 3.8501587  
3.7218904  
C 0.9472668 3.6876688  
2.3516707  
C -0.1923853 3.2728872  
1.6513596  
O 1.9870146 3.8793556  
1.4803571  
C 1.5094040 3.4167653  
0.1941899  
O 0.0858201 3.1974993  
0.3111888  
P -3.0654570 3.2449348  
4.5495078  
Au -4.3569626 1.3872621  
4.3248720  
O -5.6929216 -0.2770976  
4.1683004  
Cl -7.0882519 -0.0362794  
3.3610673  
O -8.0963707 -0.8869469  
4.0721257

C -2.7340598 3.6417305  
6.3082949  
C -3.0110417 2.7088315  
7.3140851  
C -2.6954253 2.9691295  
8.6514539  
C -2.0186504 4.1885462  
8.9378667  
C -1.9073763 5.2263096  
7.9793924  
C -2.2467348 4.9001248  
6.6593291  
C -1.4745846 6.6901426  
8.2408979  
C -0.1017990 6.9471446  
7.5804728  
O -1.4950975 4.3497811  
10.2059122  
C -0.0674510 4.1116836  
10.2538149  
C -3.1247681 1.9909210  
9.7663534  
C -3.9994218 2.7563962  
10.7876398  
C -3.9458227 4.7144391  
3.8815121  
C -3.2454698 5.8806835  
3.5615161  
C -3.9103487 7.0432306  
3.1639379  
C -5.3308036 6.9809487  
3.0484848  
C -6.0760748 5.8475564  
3.4698075  
C -5.3366543 4.7120410  
3.8409157  
C -3.1027559 8.3405691  
2.9323140  
C -3.1898912 8.8252259  
1.4682914  
O -5.9720407 8.1065506  
2.5501769  
C -6.4347693 7.9913565  
1.1950630

C -7.6190750 5.7311901  
3.5867789  
C -8.1669543 4.8986608  
2.4048253  
C -1.6064765 8.1365121  
3.2487321  
C -3.6282462 9.4439384  
3.8805228  
C -8.3598306 7.0821921  
3.6785978  
C -7.9658637 4.9741418  
4.8976376  
C -2.5253502 7.6250752  
7.5862225  
C -1.4101883 7.1049047  
9.7242217  
C -3.9855554 0.8425114  
9.2030312  
C -1.9127766 1.3609538  
10.4879933  
C -2.0941622 -1.8691049  
2.0794567  
C -1.2299565 -2.7578382  
1.4357922  
C -1.4737394 -4.1341464  
1.4034600  
C -2.6583196 -4.6032731  
2.0344867  
C -3.4824105 -3.7508725  
2.8186207  
C -3.1950676 -2.3757941  
2.7754585  
C -0.4348610 -5.0691968  
0.7405542  
C 0.0436494 -6.1263157  
1.7603247  
O -2.9484626 -5.9555645  
1.9050508  
C -4.0139978 -6.2427507  
0.9811549  
C -4.6425921 -4.1921372  
3.7522630  
C -5.9983811 -3.8926583  
3.0761500

C 0.8141204 -4.2868363  
0.2819373  
C -1.0135906 -5.7731647 -  
0.5065918  
C -4.5921322 -5.6685288  
4.1985579  
C -4.5688479 -3.3655115  
5.0648784  
O -6.8617527 -0.4910074  
1.9450941  
O -7.4165492 1.4354973  
3.4292954  
O -1.6372600 -1.9548515  
10.2811104  
C 3.4708877 0.2694406  
3.7365167  
C 4.5341961 1.2553305  
1.7070083  
C 2.3809560 0.3687407 -  
3.0081806  
C 0.0803727 1.1671844 -  
2.6260355  
O 1.6417858 -0.7450230  
9.7268492  
Cl 2.1819761 0.6129033  
9.1666272  
O 1.0889826 1.2344840  
8.3127250  
O 3.4078101 0.3201147  
8.3305332  
O 2.5173705 1.4997293  
10.3382767  
H -2.1294030 5.6572921  
5.8855085  
H -2.1578893 5.8691500  
3.6041546  
H -5.8630008 3.7955826  
4.1109309  
H -0.3353532 3.7887868  
5.4519611  
H 1.8357408 4.1396873  
4.2723523  
H 2.0039538 2.4628909 -  
0.0522381

H 1.6951659 4.1925153 -  
0.5600324  
H 1.1692361 0.0727707  
3.1897019  
H -0.9518236 0.0744507 -  
0.5144942  
H -0.3356013 -2.3654534  
0.9620819  
H -3.8333246 -1.6863819  
3.3292414  
H -4.0103857 -0.6149825  
0.7374991  
H -5.6328150 0.8746778 -  
0.4445373  
H -5.3197914 5.2192788  
0.8578117  
H -4.5453899 5.6165703 -  
0.7530670  
H -1.1793845 0.9670865  
9.7709932  
H -1.4066347 2.0866967  
11.1323313  
H -2.2496594 0.5259007  
11.1186821  
H -4.8810140 1.2107802  
8.6797548  
H -3.4186633 0.2014291  
8.5140399  
H -4.3216267 0.2123327  
10.0393876  
H -4.8931396 3.1750683  
10.3000415  
H -3.4393782 3.5731324  
11.2586468  
H -3.5203897 7.4635772  
8.0266470  
H -2.6127367 7.4818980  
6.5011105  
H -2.2392347 8.6737478  
7.7570573  
H -0.5789139 6.6425127  
10.2660147  
H -2.3403583 6.8577275  
10.2529193

H -1.2689865 8.1958150  
9.7711850  
H 0.6792421 6.3051655  
8.0135099  
H 0.1983347 7.9961640  
7.7275338  
H -0.1322947 6.7523793  
6.4976385  
H -7.9180183 7.7284348  
4.4500280  
H -8.3759468 7.6409785  
2.7381309  
H -9.4055095 6.8854981  
3.9587927  
H -7.6463641 3.9242991  
4.8855038  
H -7.5132161 5.4667593  
5.7709609  
H -9.0575154 4.9724276  
5.0320186  
H -7.7120480 3.8978919  
2.3822242  
H -9.2555619 4.7719000  
2.5076347  
H -7.9778824 5.3802581  
1.4340886  
H -6.0645440 -2.8406487  
2.7699835  
H -6.1547664 -4.5120274  
2.1816614  
H -6.8230041 -4.0935631  
3.7769211  
H -3.5758973 -3.4537046  
5.5311978  
H -4.7910629 -2.3026525  
4.9166287  
H -5.3197033 -3.7529399  
5.7698280  
H -3.6197392 -5.9168964  
4.6447424  
H -5.3650196 -5.8224835  
4.9672017  
H -4.7855648 -6.3839474  
3.3943152

H -1.4402887 7.8167284  
4.2882981  
H -1.1327624 7.4035950  
2.5777652  
H -1.0830564 9.0937130  
3.1142968  
H -4.6821282 9.6719100  
3.6829763  
H -3.5292108 9.1328924  
4.9311530  
H -3.0388499 10.3637254  
3.7426456  
H -4.1837775 9.2158487  
1.2275386  
H -2.4664747 9.6389694  
1.3071043  
H -2.9440065 8.0127430  
0.7674744  
H 2.8756120 1.2438306 -  
2.5641751  
H 3.1030149 -0.4538963 -  
3.0210919  
H 2.1388438 0.6092057 -  
4.0546049  
H -0.9337884 0.9993979 -  
2.2410179  
H 0.4290046 2.1339002 -  
2.2372718  
H 0.0042782 1.2469286 -  
3.7204115  
H -0.4907554 -1.5145983 -  
2.3714583  
H 0.3543948 -1.2229585 -  
3.9123749  
H 1.1499880 -2.1493852 -  
2.6189262  
H 4.7817089 1.1387880  
0.6437969  
H 3.9542146 2.1810284  
1.8381752  
H 5.4741685 1.3620239  
2.2703632  
H 5.0577536 -1.3411015  
1.1279307

H 5.4535767 -1.1614138  
2.8465132  
H 4.0479711 -2.1349568  
2.3749115  
H 0.5837686 -3.5506934 -  
0.5024220  
H 1.3031642 -3.7608802  
1.1157368  
H 1.5414424 -4.9981139 -  
0.1364638  
H -1.7857989 -6.5019252 -  
0.2410243  
H -1.4431047 -5.0422668 -  
1.2085559  
H -0.2100362 -6.3140958 -  
1.0302417  
H -0.7840711 -6.7571601  
2.1019187  
H 0.8072739 -6.7715610  
1.2984342  
H 0.4952317 -5.6423582  
2.6387534  
H 0.2091781 4.1249307  
11.3146256  
H 0.1878855 3.1372578  
9.8143656  
H 0.4864719 4.9010697  
9.7216400  
H -7.1724683 7.1836486  
1.0776155  
H -6.9094416 8.9495747  
0.9505699  
H -5.5966942 7.8141949  
0.5027086  
H 4.7661789 -1.9728683 -  
1.4001624  
H 3.6224366 -2.5419477 -  
0.1374442  
H 3.0261330 -2.1669860 -  
1.7831747  
H -4.0049348 -7.3294751  
0.8294016  
H -4.9939081 -5.9414314  
1.3798551

H -3.8508050 -5.7331380  
0.0185396  
H 4.8232780 -1.7987539  
6.9911788  
H 2.5961835 -2.2005912  
7.8646807  
H -3.1927535 -4.2828610  
11.4281795  
H -3.9466003 -2.6635149  
9.7796850  
H -1.0183352 0.4662114  
7.3101457  
H -4.4240172 -3.2078598  
8.1325344  
H -2.6301445 -6.6296918  
12.0477170  
H 0.3956050 -1.4971796  
8.9851644  
H 1.3948788 -6.0515850  
8.0934279  
H 5.6177449 -2.9660985  
4.9214737  
H 0.7950943 -8.4160035  
7.7028526  
H -1.1516345 -4.8676575  
4.8127863  
H -0.7586024 -9.0274546  
5.8437053  
H 1.3081444 -3.5125746  
8.8590646  
H -1.7137394 -7.2282062  
4.4001556  
H -2.5094150 -8.3879465  
10.2859508  
H -3.5475042 -5.4653716  
7.2930344  
H 4.0663109 -4.5150263  
3.7213293  
H -2.9632007 -7.7975792  
7.9049725  
H -1.4112759 -3.1323523  
6.0791720  
H -0.0650327 -2.5831842  
5.0572122

H 2.9687128 -0.5873345  
4.2091898  
H 4.4287717 0.4073438  
4.2578730  
H 2.8663899 1.1717599  
3.9137094  
H 1.7883651 -4.9112759  
4.5875585  
H 0.7409625 -1.0943854  
6.8561479  
H -3.4741863 1.7630629  
7.0351963  
H -0.3148258 -4.2318970  
8.7412721  
H -4.3335935 2.0649499  
11.5767612  
H -2.2971288 -0.7645777  
7.0032145

## 5. Int 3a

C 0.4158779 14.7958690  
2.6672021  
C -0.2328054 16.0030405  
2.9078150  
C 0.3702809 17.2033074  
2.5226306  
C 1.6394359 17.2265240  
1.9405831  
C 2.3175236 15.9803202  
1.7956733  
C 1.6835600 14.7383573  
2.0631766  
P -1.9530094 15.9890823  
3.5544960  
C -2.0759983 17.5618565  
4.5050474  
C -1.3434133 17.6858819  
5.7271581  
C -1.2769931 18.9649772  
6.2559057  
C -1.9490849 20.0567870  
5.6924997

C -2.7250176 19.9278879  
4.5580646  
C -2.7639939 18.6531182  
3.9631097  
O -1.7055523 21.1857576  
6.4301838  
C -0.9832868 20.7347032  
7.6020376  
O -0.5771415 19.3691605  
7.3627829  
C -0.7264396 16.5323824  
6.4403386  
C -1.4765263 15.6860135  
7.3192438  
C -0.8812289 14.5837697  
7.9402234  
C 0.4754867 14.2633268  
7.7439740  
C 1.1973758 15.1048139  
6.9228436  
C 0.6148845 16.2203416  
6.3056192  
O 1.5734731 16.9191601  
5.6103405  
C 2.6932608 16.0128853  
5.5410571  
O 2.5365989 15.0546147  
6.6113087  
P -3.2689480 16.0618056  
7.5374000  
C -3.2928812 17.6351428  
8.4849764  
C -2.4155695 17.8362857  
9.5480443  
C -2.5170799 18.9521931  
10.3952117  
C -3.6048078 19.8348086  
10.1556914  
C -4.4133881 19.7425934  
8.9857022  
C -4.2453341 18.6108709  
8.1806217  
C -1.4278892 19.1025351  
11.4899465

C -1.6919022 18.0899314  
12.6272673  
O -3.8933810 20.8580670  
11.0468581  
C -4.6149287 20.4191998  
12.2124052  
C -5.4027589 20.8508996  
8.5591808  
C -6.5727985 21.0015477  
9.5556510  
C 2.2185958 18.5653073  
1.4303143  
C 3.5075588 18.9664365  
2.1812010  
O 3.6255786 16.0214124  
1.3326757  
C 4.6233911 15.7987924  
2.3420250  
C 2.2240263 13.3210366  
1.7389264  
C 2.6730941 12.6280057  
3.0460538  
C -3.0200975 16.1363272  
2.0714044  
C -2.7573945 17.0827082  
1.0821777  
C -3.5604066 17.2052298 -  
0.0613966  
C -4.6899747 16.3506566 -  
0.1435001  
C -4.8678648 15.2533190  
0.7455593  
C -4.0400211 15.2007710  
1.8690502  
C -5.8511602 14.0984448  
0.4550231  
C -5.4994984 13.5020576 -  
0.9287669  
O -5.6388629 16.5392550 -  
1.1312545  
C -6.5838070 17.5839691 -  
0.8040576  
C -3.0858304 18.2286013 -  
1.1253779

|                           |                           |
|---------------------------|---------------------------|
| C -3.2162228 19.6590423 - | O -10.6654963 14.8829796  |
| 0.5570227                 | 3.4805834                 |
| Au -2.3818456 14.0283491  | O -2.7452275 12.0872872   |
| 4.6262776                 | 5.4447075                 |
| Au -4.7969557 16.0221691  | Cl -1.4688722 11.0725022  |
| 5.7281139                 | 5.4479489                 |
| C -6.5462881 15.9676752   | O -2.0672390 9.7040591    |
| 4.5605124                 | 5.3367124                 |
| C -7.6575751 15.5854529   | O -0.7440609 11.2763101   |
| 5.5237328                 | 6.7500009                 |
| C -7.8101698 16.5318014   | O -0.5979191 11.4206830   |
| 6.7238986                 | 4.2648326                 |
| C -9.3063708 16.4511777   | C -5.7041560 12.9693356   |
| 7.1250786                 | 1.4950401                 |
| C -9.9227610 16.5476535   | C -7.3252657 14.5512698   |
| 5.7082648                 | 0.4655180                 |
| N -9.0471983 15.6565499   | C -1.5914093 17.9421821 - |
| 4.9302261                 | 1.4276340                 |
| C -9.5969281 15.0855220   | C -3.8095825 18.1617662 - |
| 7.7695639                 | 2.4850292                 |
| C -8.7095067 14.5476050   | C -3.9684728 14.8483842   |
| 8.7173721                 | 8.7445151                 |
| C -8.9516145 13.3114599   | C -4.2119355 13.5337558   |
| 9.3182635                 | 8.3411955                 |
| C -10.0841784 12.5707133  | C -4.8930737 12.6167620   |
| 8.9736178                 | 9.1600307                 |
| C -10.9787911 13.0907473  | C -5.2386681 13.0575942   |
| 8.0376064                 | 10.4653281                |
| C -10.7394006 14.3356596  | C -5.1203997 14.4190245   |
| 7.4494848                 | 10.8580238                |
| C -9.7334433 17.6310044   | C -4.4728888 15.2868034   |
| 8.0031396                 | 9.9725619                 |
| C -10.2402655 17.4490109  | C -5.2308242 11.2406169   |
| 9.2982229                 | 8.5257274                 |
| C -10.6000095 18.5438509  | C -3.9484815 10.3854910   |
| 10.0917111                | 8.4347206                 |
| C -10.4687853 19.8448251  | O -5.7519983 12.1697206   |
| 9.6024457                 | 11.4022663                |
| C -9.9720767 20.0410305   | C -4.7568683 11.3155339   |
| 8.3102022                 | 11.9943760                |
| C -9.6065139 18.9486032   | C -5.6862355 14.9770049   |
| 7.5232696                 | 12.1861804                |
| C -9.4958257 14.7963480   | C -7.1865709 14.6341527   |
| 4.0380425                 | 12.3222261                |

O -8.6780304 13.7986961  
3.7250214  
C -9.2485402 12.6272008  
3.0352078  
C -9.8529788 11.6945747  
4.0463874  
C -11.2375238 11.4879251  
4.0986977  
C -11.7855453 10.6324302  
5.0597792  
C -10.9537856 9.9936586  
5.9836783  
C -9.5712207 10.2088081  
5.9462372  
C -9.0236910 11.0488362  
4.9774708  
C -5.5700219 16.5151808  
12.2432173  
C -4.9159885 14.4158454  
13.4021078  
C -6.3376124 10.4342645  
9.2359031  
C -5.7600334 11.4893593  
7.0860829  
C -1.2943656 20.5233073  
12.0769547  
C -0.0438553 18.7722519  
10.8730313  
C -6.0177249 20.5445822  
7.1790055  
C -4.6408553 22.1913311  
8.4374605  
C 1.2132744 19.7209309  
1.6144820  
C 2.5101901 18.4443856 -  
0.0838324  
C 3.3643892 13.2821591  
0.7004915  
C 1.0697490 12.4827249  
1.1259701  
O -11.2054368 17.2572120  
2.9822472  
Cl -9.9878934 18.0637986  
2.3431331

O -9.0467808 17.0494984  
1.7337309  
O -9.3105927 18.8299173  
3.4552085  
O -10.5657661 18.9889700  
1.3155305  
H -1.8927991 17.7360579  
1.1894398  
H -0.1562057 18.1380760  
2.7043120  
H -0.0807115 13.8684434  
2.9572337  
H -3.3521262 18.5189304  
3.0562328  
H -3.2694207 20.7713862  
4.1343615  
H -1.6572607 20.7646713  
8.4740896  
H -0.0913143 21.3592111  
7.7391750  
H -4.8667058 18.4651297  
7.2977644  
H -1.6359860 17.0963322  
9.7269839  
H -4.3544958 16.3309793  
10.2438557  
H -3.8797003 13.2110437  
7.3541138  
H -1.4851456 13.9382645  
8.5784268  
H 0.9252219 13.3868272  
8.2081741  
H 2.6621251 15.4814199  
4.5747980  
H 3.6249694 16.5723471  
5.6858729  
H -7.5794382 15.0721143  
1.3982785  
H -7.5550777 15.2133513 -  
0.3747663  
H -7.9769649 13.6680714  
0.3771726  
H -4.6773870 12.5775223  
1.5458409



H -6.0046469 13.2898824  
2.5044555  
H -6.3572133 12.1340085  
1.2018284  
H -4.4615118 13.1364392 -  
0.9434627  
H -5.6218551 14.2473118 -  
1.7246099  
H -1.4632831 16.9257376 -  
1.8283398  
H -0.9477092 18.0361491 -  
0.5429281  
H -1.2251867 18.6577503 -  
2.1790353  
H -4.8452094 18.5139542 -  
2.4387808  
H -3.8127082 17.1428080 -  
2.8936647  
H -3.2723311 18.8126286 -  
3.1921188  
H -4.2638281 19.9053943 -  
0.3291977  
H -2.8454702 20.3926882 -  
1.2893059  
H -2.6337555 19.7811747  
0.3686898  
H 3.1077070 13.8580968 -  
0.1993303  
H 4.3194845 13.6567443  
1.0818245  
H 3.5225876 12.2352686  
0.4013495  
H 0.2514786 12.2949270  
1.8327773  
H 0.6550095 12.9768733  
0.2350034  
H 1.4616270 11.5007416  
0.8234126  
H 1.8429041 12.5576008  
3.7645048  
H 3.0158534 11.6046428  
2.8294419  
H 3.5020684 13.1628491  
3.5329203

H -3.1442595 10.9277749  
7.9219414  
H -3.5790808 10.0988308  
9.4303646  
H -4.1461788 9.4629659  
7.8678918  
H -6.6238622 12.1713740  
7.0998316  
H -4.9943340 11.8957929  
6.4142224  
H -6.0843640 10.5300891  
6.6558315  
H -7.2551756 11.0252885  
9.3503125  
H -6.5767198 9.5613848  
8.6087671  
H -6.0471890 10.0565156  
10.2206298  
H 0.2655201 19.5379958  
1.0848092  
H 0.9887068 19.9160541  
2.6741065  
H 1.6486786 20.6385397  
1.1941189  
H 3.2522810 17.6631263 -  
0.2865074  
H 1.5897714 18.2042594 -  
0.6375083  
H 2.8965527 19.4016508 -  
0.4665010  
H 4.3495983 18.3188420  
1.9169036  
H 3.7840988 19.9969752  
1.9112266  
H 3.3571566 18.9327569  
3.2711451  
H -1.2053240 21.2789807  
11.2832344  
H -2.1310513 20.8107094  
12.7209897  
H -0.3790909 20.5634741  
12.6865713  
H 0.0369987 17.7357894  
10.5204352

H 0.1829925 19.4318403  
10.0237957  
H 0.7335110 18.9182925  
11.6370950  
H -1.7166001 17.0602309  
12.2406286  
H -0.8921451 18.1528245  
13.3817439  
H -2.6480553 18.2805055  
13.1348088  
H -4.1886523 22.4841112  
9.3931261  
H -3.8490045 22.1203025  
7.6760260  
H -5.3376120 22.9852075  
8.1271184  
H -6.2419290 21.4172553  
10.5128622  
H -7.3244452 21.6865025  
9.1355439  
H -7.0724985 20.0375262  
9.7333276  
H -4.5246546 16.8573439  
12.2457513  
H -6.0906641 17.0008871  
11.4035888  
H -6.0351893 16.8717818  
13.1739520  
H -5.1107142 13.3476971  
13.5471165  
H -3.8317394 14.5655994  
13.2869366  
H -5.2366305 14.9393641  
14.3162646  
H -7.3546363 13.5511300  
12.3156319  
H -7.5720649 15.0390413  
13.2708218  
H -7.7663521 15.0854049  
11.5041091  
H -7.2791710 17.6431513 -  
1.6500898  
H -7.1398953 17.3443472  
0.1145625

H -6.0788702 18.5549350 -  
0.6772884  
H 4.5146527 14.8131515  
2.8191418  
H 5.5935575 15.8465565  
1.8326276  
H 4.5823413 16.5791652  
3.1191190  
H -4.9071587 21.3273081  
12.7543252  
H -5.5151253 19.8514822  
11.9296591  
H -3.9898603 19.7922592  
12.8661752  
H -5.2624489 10.7643349  
12.7971199  
H -4.3447890 10.6011362  
11.2662978  
H -3.9292373 11.9075466  
12.4158638  
H -9.8633187 21.0511040  
7.9100382  
H -9.2197543 19.1360876  
6.5190691  
H -11.8864267 12.0032868  
3.3868338  
H -9.9740404 12.9621294  
2.2846563  
H -6.7442361 16.9568911  
4.1177400  
H -8.3755779 12.1895752  
2.5391138  
H -12.8647684 10.4703354  
5.0904625  
H -11.4660160 14.7115264  
6.7280527  
H -10.7533704 20.6994021  
10.2194714  
H -11.8642331 12.5215579  
7.7488641  
H -7.8115855 15.0982746  
9.0038276  
H -10.2645691 11.5943824  
9.4279633

H -9.8522109 17.5709401  
 5.3239729  
 H -8.2450667 12.9290459  
 10.0560480  
 H -11.3828364 9.3325393  
 6.7393186  
 H -7.9446422 11.2178685  
 4.9478517  
 H -10.9902304 18.3727047  
 11.0973613  
 H -8.9197874 9.7214308  
 6.6744518  
 H -7.1192937 16.2694700  
 7.5318233  
 H -7.5705604 17.5574680  
 6.4073248  
 H -6.6507508 19.6458139  
 7.1992840  
 H -6.6585270 21.3867824  
 6.8809395  
 H -5.2508086 20.4147073  
 6.4008812  
 H -10.3572414 16.4399526  
 9.6947370  
 H -4.1784913 14.4171250  
 2.6117662  
 H -10.9681283 16.2322085  
 5.6338612  
 H -6.1642926 12.6515882 -  
 1.1459469  
 H -6.4558963 15.2388825  
 3.7445520  
 H -10.9190348 15.9237707  
 3.2773370  
 H -7.5273042 14.5496708  
 5.8727448

## 6. Int 3b

C -4.1550729 17.1578258  
 4.7885504

C -4.4665663 16.2614990  
 5.8140599  
 C -5.7199522 15.6417962  
 5.8169043  
 C -6.6335828 15.8222764  
 4.7740191  
 C -6.2213996 16.6233323  
 3.6754945  
 C -5.0310201 17.3957534  
 3.7154062  
 P -3.3565691 16.1665357  
 7.2908100  
 C -1.8710209 15.1881557  
 6.7831531  
 C -0.9052230 14.8365012  
 7.7812697  
 C 0.1435811 14.0435570  
 7.3463111  
 C 0.3197822 13.6884716  
 6.0020624  
 C -0.5763544 14.0669361  
 5.0244652  
 C -1.6915866 14.8134478  
 5.4477771  
 O 1.4434635 12.9044891  
 5.8760521  
 C 2.1142831 13.0330281  
 7.1488761  
 O 1.1295286 13.4632140  
 8.1101611  
 C -1.0213235 15.2682718  
 9.2034115  
 C -0.6154347 16.5568097  
 9.6763994  
 C -0.9101520 16.9691018  
 10.9810456  
 C -1.5506815 16.1223723  
 11.9044599  
 C -1.8428986 14.8450625  
 11.4700543  
 C -1.5810750 14.4331730  
 10.1577194  
 O -1.9702408 13.1307285  
 9.9909684

C -2.6099938 12.7449399  
11.2276255  
O -2.4188275 13.8228757  
12.1759970  
P 0.4377583 17.6119728  
8.5974075  
C 2.0304310 16.7060058  
8.4284334  
C 2.5410557 15.9216191  
9.4656675  
C 3.8181483 15.3578502  
9.3897572  
C 4.5755811 15.6030064  
8.2054680  
C 4.1356027 16.5017846  
7.1974992  
C 2.8227630 16.9835571  
7.3182656  
C 4.3709838 14.5531490  
10.5887847  
C 5.6691289 15.2217820  
11.0985785  
O 5.8043216 14.9673630  
8.0963946  
C 5.8498983 13.8923085  
7.1446674  
C 4.9561658 17.0481815  
5.9998226  
C 4.7002139 18.5768838  
5.8887323  
C -8.0535652 15.2208228  
4.8851928  
C -8.2939523 14.1213487  
3.8279378  
O -7.0654896 16.6654661  
2.5745796  
C -6.5993259 15.8938617  
1.4546179  
C -4.6384995 18.5215145  
2.7245680  
C -4.0679331 19.7138706  
3.5367021  
C -4.2685202 15.0297405  
8.4112629

C -4.4416614 13.6924723  
8.0586171  
C -5.2860406 12.8325685  
8.7783572  
C -6.0168772 13.4159873  
9.8473223  
C -5.7187177 14.7159845  
10.3476774  
C -4.8552528 15.5105069  
9.5844191  
C -6.2830516 15.2434059  
11.6862020  
C -5.9827433 14.2314826  
12.8168649  
O -7.0313330 12.7108186  
10.4778202  
C -8.2633101 12.6878657  
9.7340159  
C -5.3191821 11.3460112  
8.3346983  
C -3.8665677 10.8686009  
8.0737421  
Au -3.1059408 18.4299968  
7.9655581  
Au -0.3735727 18.1887207  
6.5508327  
O -0.9266078 18.7898176  
4.5707018  
Cl 0.1122461 18.3376405  
3.4004449  
O 1.5136059 18.4973918  
3.9387515  
C -3.1907143 20.5015998  
8.3414863  
C -3.4265700 20.8815430  
9.8051862  
C -4.3547078 19.9612429  
10.6300800  
C -5.7800434 20.5779364  
10.5111464  
C -5.4099193 22.0545209  
10.7405872  
N -4.1436427 22.2066429  
9.9964569

C -6.3262678 20.3204138  
9.0979964  
C -6.4702535 18.9952546  
8.6518367  
C -6.8907077 18.7049292  
7.3548658  
C -7.1691943 19.7403970  
6.4581818  
C -7.0459773 21.0627524  
6.8863882  
C -6.6350128 21.3465351  
8.1942947  
C -6.7336225 20.1055942  
11.6178784  
C -8.0286749 19.6448834  
11.3395700  
C -8.8777936 19.2141766  
12.3645317  
C -8.4526236 19.2459850  
13.6935181  
C -7.1732382 19.7278501  
13.9890696  
C -6.3270031 20.1541682  
12.9646860  
C -3.7696662 23.3722131  
9.5093038  
O -4.3813925 24.4842165  
9.8179426  
O -2.7555421 23.3905547  
8.6600462  
C -2.6529541 24.5652800  
7.7661234  
C -3.6812959 24.4515198  
6.6767584  
C -4.8380662 25.2439186  
6.6982079  
C -5.8191433 25.0870641  
5.7147086  
C -5.6523374 24.1321201  
4.7075534  
C -4.5011599 23.3368877  
4.6818852  
C -3.5204119 23.4960512  
5.6608399

C -7.8039944 15.5015640  
11.6000255  
C -5.6163045 16.5736330  
12.0846161  
C -6.1053694 11.2099921  
7.0114281  
C -5.8984226 10.3734834  
9.3831137  
C 0.9186364 19.0998899  
9.5608209  
C 0.7765368 20.3658601  
8.9841407  
C 1.2498969 21.5167172  
9.6214559  
C 1.8059382 21.3612264  
10.9223950  
C 2.0979831 20.0847807  
11.4673376  
C 1.6150280 18.9733385  
10.7622796  
C 1.2843597 22.8615904  
8.8622670  
C 0.5124230 23.9894777  
9.5791602  
O 2.1130396 22.5047715  
11.6351192  
C 1.1177827 22.8284034  
12.6328537  
C 2.9492594 19.7797642  
12.7274276  
C 3.7108724 20.9761046  
13.3331428  
O -0.1756784 19.2659624  
2.2598172  
O -0.1893779 16.9029360  
3.0610035  
C 2.0463940 19.1576675  
13.8153886  
C 4.0377005 18.7495721  
12.3283717  
C 2.7682752 23.2737825  
8.7077810  
C 0.6906492 22.7167607  
7.4464994

|    |            |            |   |            |            |
|----|------------|------------|---|------------|------------|
| C  | 4.6573016  | 13.0814374 | H | -5.9979477 | 15.0206301 |
|    | 10.2176419 |            |   | 6.6625613  |            |
| C  | 3.3691140  | 14.5276582 | H | -3.2169771 | 17.7118784 |
|    | 11.7612524 |            |   | 4.8355940  |            |
| C  | 4.4693338  | 16.3898586 | H | -2.4286931 | 15.1164511 |
|    | 4.6884846  |            |   | 4.7044702  |            |
| C  | 6.4853011  | 16.8923678 | H | -0.4323576 | 13.8042423 |
|    | 6.1364774  |            |   | 3.9771706  |            |
| C  | -9.1055711 | 16.3431664 | H | 2.8965947  | 13.8077309 |
|    | 4.7238199  |            |   | 7.0683042  |            |
| C  | -8.2845298 | 14.5820053 | H | 2.5157583  | 12.0581961 |
|    | 6.2698330  |            |   | 7.4493677  |            |
| C  | -3.5345756 | 18.0169811 | H | -0.5093506 | 23.6807473 |
|    | 1.7697353  |            |   | 9.8330935  |            |
| C  | -5.8165641 | 19.0963952 | H | 1.0191467  | 24.3095377 |
|    | 1.9107348  |            |   | 10.4944539 |            |
| O  | -4.4545171 | 24.6031943 | H | 0.4498111  | 24.8648115 |
|    | 12.3186209 |            |   | 8.9136862  |            |
| Cl | -3.1145576 | 24.0015429 | H | 1.2316073  | 21.9771969 |
|    | 12.9214025 |            |   | 6.8381213  |            |
| O  | -2.7510516 | 24.8243783 | H | -0.3715565 | 22.4302821 |
|    | 14.1187135 |            |   | 7.4744745  |            |
| O  | -2.0579065 | 24.0800445 | H | 0.7666812  | 23.6838312 |
|    | 11.8370009 |            |   | 6.9286987  |            |
| O  | -3.3824966 | 22.5615951 | H | 3.3333039  | 22.5028341 |
|    | 13.2986688 |            |   | 8.1622133  |            |
| H  | 1.8134214  | 17.9771652 | H | 3.2383176  | 23.4274691 |
|    | 11.1559727 |            |   | 9.6876201  |            |
| H  | 1.9165042  | 15.7301341 | H | 4.6927882  | 19.1573505 |
|    | 10.3360366 |            |   | 11.5440676 |            |
| H  | 2.4116564  | 17.6176740 | H | 3.6193008  | 17.8066559 |
|    | 6.5307417  |            |   | 11.9543351 |            |
| H  | -0.6325598 | 17.9720725 | H | 4.6573137  | 18.5107383 |
|    | 11.3014492 |            |   | 13.2056391 |            |
| H  | -1.7825910 | 16.4529478 | H | 3.0541554  | 21.7047204 |
|    | 12.9164399 |            |   | 13.8196214 |            |
| H  | -3.6889132 | 12.6091151 | H | 4.3067287  | 21.5034233 |
|    | 11.0503801 |            |   | 12.5770426 |            |
| H  | -2.1314061 | 11.8348358 | H | 4.3973332  | 20.5903434 |
|    | 11.6142294 |            |   | 14.1029365 |            |
| H  | -4.6257334 | 16.5285950 | H | 1.2601627  | 19.8590580 |
|    | 9.8954568  |            |   | 14.1318270 |            |
| H  | -3.9082904 | 13.3121249 | H | 2.6466939  | 18.8966816 |
|    | 7.1869722  |            |   | 14.7007785 |            |

H 1.5543224 18.2402098  
13.4580794  
H 6.8411772 17.2596848  
7.1088610  
H 6.8353670 15.8626013  
6.0132583  
H 6.9646165 17.4930376  
5.3491013  
H 3.6646683 18.8206147  
5.6190647  
H 4.9433850 19.0869040  
6.8329147  
H 5.3421344 18.9915661  
5.0977806  
H 3.3996862 16.5827233  
4.5213707  
H 5.0235324 16.8052722  
3.8327914  
H 4.6225891 15.3003635  
4.6911648  
H -2.6770432 17.6198140  
2.3292090  
H -3.8990165 17.2206799  
1.1046874  
H -3.1706470 18.8439372  
1.1417953  
H -4.7802388 20.0461139  
4.3064709  
H -3.1115244 19.4862971  
4.0216102  
H -3.8806987 20.5493557  
2.8457212  
H -6.6521150 19.3833909  
2.5654015  
H -5.4678211 20.0005144  
1.3887177  
H -6.2034942 18.4096709  
1.1514049  
H 3.1260517 15.5366427  
12.1263444  
H 2.4306748 14.0177003  
11.4944703  
H 3.8199338 13.9775076  
12.5996017

H 6.4445678 15.2292178  
10.3231852  
H 5.4755811 16.2594163  
11.4078160  
H 6.0532566 14.6717888  
11.9717184  
H 5.5062300 12.9914512  
9.5326561  
H 4.9062097 12.5151002  
11.1284302  
H 3.7738958 12.6092933  
9.7620853  
H -5.4263092 10.5131582  
10.3660161  
H -6.9808673 10.4682809  
9.5145430  
H -5.6949379 9.3434646  
9.0532835  
H -3.3683667 11.4206689  
7.2665968  
H -3.2460919 10.9651224  
8.9747212  
H -3.8851395 9.8081912  
7.7822960  
H -5.6729868 11.8481848  
6.2261144  
H -6.0738600 10.1674097  
6.6590838  
H -7.1609892 11.4917120  
7.1303771  
H -6.4380337 13.2539922  
12.6188615  
H -4.8970027 14.1023246  
12.9396646  
H -6.3855856 14.6151491  
13.7668218  
H -8.3722007 14.5689074  
11.5173392  
H -8.1390306 16.0238787  
12.5089926  
H -8.0465628 16.1462555  
10.7414817  
H -7.6220080 13.7233917  
6.4497118

H -8.1422190 15.3035803  
7.0887166  
H -9.3206506 14.2168378  
6.3245173  
H -8.3225764 14.5335619  
2.8141085  
H -7.5088807 13.3509862  
3.8745477  
H -9.2612622 13.6303144  
4.0177591  
H -9.0284753 16.8288683  
3.7444681  
H -10.1173978 15.9203428  
4.8253276  
H -8.9798959 17.1076160  
5.5055173  
H 1.4904054 23.7136894  
13.1621002  
H 0.1482628 23.0584612  
12.1677256  
H 0.9855864 22.0019715  
13.3495147  
H 5.5102901 14.2079636  
6.1479268  
H 6.8982453 13.5752118  
7.0865930  
H 5.2336440 13.0418072  
7.4783920  
H -9.0104516 12.2253532  
10.3907288  
H -8.5836711 13.7075862  
9.4684652  
H -8.1729649 12.0930539  
8.8121404  
H -7.4136683 15.8962955  
0.7189303  
H -5.6993466 16.3346576  
1.0005936  
H -6.3755099 14.8575011  
1.7544125  
H -6.8296041 19.7759554  
15.0243898  
H -5.3383870 20.5360669  
13.2290744

H -4.9725281 25.9775644  
7.4958107  
H -2.7621550 25.4803390  
8.3593920  
H -2.2751245 20.9837833  
7.9770314  
H -1.6301138 24.4873355  
7.3843854  
H -6.7157205 25.7096121  
5.7370788  
H -6.5354936 22.3941655  
8.4813908  
H -9.1130803 18.9069530  
14.4940251  
H -7.2479881 21.8868776  
6.1993799  
H -6.2483592 18.1698607  
9.3301848  
H -7.4725044 19.5129287  
5.4340249  
H -5.2457149 22.2373147  
11.8081796  
H -6.9687953 17.6666045  
7.0313718  
H -6.4189084 24.0060974  
3.9401856  
H -2.6268085 22.8670907  
5.6441646  
H -9.8777875 18.8523440  
12.1159312  
H -4.3683229 22.5895654  
3.8987366  
H -4.3004309 18.9303256  
10.2649822  
H -4.0429306 19.9701216  
11.6831461  
H -5.8833474 17.3961363  
11.4077210  
H -5.9715155 16.8678830  
13.0819260  
H -4.5197951 16.4925114  
12.1251176  
H -8.3800182 19.6131559  
10.3080109



H -2.4564916 20.9806494  
10.3154908  
H 0.3042152 20.4367202  
8.0053925  
H -6.1569251 22.7728442  
10.3818711  
H 2.8357776 24.2142442  
8.1391546  
H -4.0182917 20.8543235  
7.7085172  
H -4.4809000 24.5515990  
10.8868305

## 7. Product (S)

C -2.6420978 20.6513644  
9.5893324  
C -4.0911998 20.9005926  
9.1827905  
C -5.0697150 19.8587470  
9.7512344  
C -6.4088223 20.6204648  
9.9125360  
C -5.8642157 21.9512523  
10.4842011  
N -4.6366772 22.1763631  
9.7170948  
C -7.0655753 20.7842632  
8.5293151  
C -7.5330069 19.6322638  
7.8720291  
C -8.1093912 19.7075019  
6.6036323  
C -8.2290002 20.9444978  
5.9591026  
C -7.7757668 22.0965845  
6.6027723  
C -7.2032404 22.0179755  
7.8780156  
C -7.4063656 19.9839316  
10.8748627  
C -8.5552357 20.7083991  
11.2382772  
C -9.4961695 20.1711613  
12.1169788

C -9.3135856 18.8871584  
12.6434069  
C -8.1836790 18.1520332  
12.2804513  
C -7.2371860 18.6976412  
11.4048298  
C -4.3961829 23.4002513  
9.1701513  
O -4.9969586 24.4343311  
9.4594769  
O -3.3837999 23.3345539  
8.2448560  
C -3.2246806 24.5297861  
7.4249670  
C -4.2449408 24.5813591  
6.3159245  
C -5.2991244 25.5042473  
6.3539447  
C -6.2467850 25.5407010  
5.3266988  
C -6.1545637 24.6457219  
4.2567136  
C -5.1120740 23.7132563  
4.2169230  
C -4.1615491 23.6856465  
5.2387296  
H -8.0330211 17.1464219  
12.6789830  
H -6.3624405 18.1041470  
11.1338222  
H -5.3803831 26.1853105  
7.2035866  
H -3.2883861 25.4216474  
8.0624316  
H -2.5413704 20.6690319  
10.6850636  
H -2.2067412 24.4342245  
7.0254203  
H -7.0618855 26.2664370  
5.3647820  
H -6.8612492 22.9413793  
8.3469345  
H -10.0505414 18.4630568  
13.3282391

H -7.8501953 23.0685322  
6.1117552  
H -7.4555159 18.6620580  
8.3694328  
H -8.6725134 21.0065840  
4.9633123  
H -5.6449805 21.8215089  
11.5564520  
H -8.4676547 18.7977505  
6.1167850  
H -6.8966773 24.6710218  
3.4559137  
H -3.3460841 22.9582790  
5.2063257  
H -10.3783107 20.7546572  
12.3889915

H -5.0387303 23.0098273  
3.3849645  
H -5.1436626 18.9767497  
9.1020934  
H -4.7151280 19.5295977  
10.7410127  
H -8.7197113 21.7025501  
10.8153202  
H -6.5371902 22.8102605  
10.3819502  
H -1.9779090 21.4130033  
9.1618182  
H -4.1666495 20.9302960  
8.0833050  
H -2.3158962 19.6644764  
9.2277660

### **Catalytic Cycle in Methanol**

#### **1. Catalyst 4c**

C 3.7516884 0.9503777  
1.9844037  
C 2.6940756 0.2429877  
1.4197755  
C 2.3522529 -1.0155170  
1.9263606  
C 3.1177654 -1.6214738  
2.9283998  
C 4.2591064 -0.9112315  
3.4021934  
C 4.5224051 0.4308842  
3.0317072  
P 1.7818176 1.0025634  
0.0273930  
Au 1.0485348 -0.5826671 -  
1.4514572  
Cl 0.4998896 -2.2870335 -  
3.0798593  
Ag 1.6302985 -3.4818598 -  
1.0704162  
O 3.6887419 -3.9450119 -  
0.2995821  
Cl 4.8460159 -3.0194424 -  
0.8568927

O 5.4806933 -2.3082303  
0.3092619  
C 2.6987935 -2.9910084  
3.5075792  
C 1.3981223 -3.4946817  
2.8606585  
O 5.1082891 -1.5764238  
4.2684719  
C 6.3341993 -2.0199217  
3.6430113  
C 5.5562556 1.3986359  
3.6608721  
C 6.1042635 0.9613526  
5.0343447  
C 0.5365971 2.1568446  
0.7426663  
C 0.7749312 2.6743933  
2.0231154  
C -0.0172418 3.6919080  
2.5798645  
C -1.0493408 4.1719326  
1.7967554  
C -1.3067906 3.6518261  
0.5240996  
C -0.5532737 2.6359309 -  
0.0404008

|   |            |            |   |    |            |            |   |
|---|------------|------------|---|----|------------|------------|---|
| O | -2.4128434 | 4.2586561  | - | C  | -9.1169559 | 0.7923384  | - |
|   | 0.0151159  |            |   |    | 0.3824071  |            |   |
| C | -2.6697992 | 5.3889292  |   | C  | -6.9783456 | 2.1228097  | - |
|   | 0.8506194  |            |   |    | 2.8293841  |            |   |
| O | -1.9806013 | 5.1299950  |   | C  | -8.3987379 | 1.8969733  | - |
|   | 2.1008705  |            |   |    | 3.3860849  |            |   |
| C | -0.8858594 | 2.1550307  | - | C  | -2.8815675 | 0.9064257  |   |
|   | 1.4051312  |            |   |    | 1.2433464  |            |   |
| C | -0.2546072 | 2.7213820  | - | C  | -3.9548672 | 1.7706700  |   |
|   | 2.5043547  |            |   |    | 1.4964248  |            |   |
| C | -0.4820379 | 2.2989561  | - | C  | -4.2233117 | 2.2356127  |   |
|   | 3.8182611  |            |   |    | 2.7851903  |            |   |
| C | -1.4055973 | 1.3118195  | - | C  | -3.3439760 | 1.8219523  |   |
|   | 4.1114785  |            |   |    | 3.8275268  |            |   |
| C | -2.0839642 | 0.7439292  | - | C  | -2.3570927 | 0.8243560  |   |
|   | 3.0217185  |            |   |    | 3.6326382  |            |   |
| C | -1.8534888 | 1.1531749  | - | C  | -2.1162526 | 0.4309873  |   |
|   | 1.6970869  |            |   |    | 2.3068396  |            |   |
| O | 0.2889694  | 3.0350140  | - | C  | -5.5117404 | 3.0427163  |   |
|   | 4.6798216  |            |   |    | 3.0611692  |            |   |
| C | 1.2189040  | 3.7473784  | - | C  | -6.4100537 | 2.1981236  |   |
|   | 3.8204148  |            |   |    | 3.9970932  |            |   |
| O | 0.6322087  | 3.7698759  | - | O  | -3.5274660 | 2.3863058  |   |
|   | 2.5021226  |            |   |    | 5.0773597  |            |   |
| P | -2.6962974 | 0.1341272  | - | C  | -2.5482939 | 3.3997472  |   |
|   | 0.4135744  |            |   |    | 5.3886721  |            |   |
| C | -4.4203203 | -0.0355281 | - | C  | -1.5790320 | 0.0587900  |   |
|   | 0.9925376  |            |   |    | 4.7352707  |            |   |
| C | -5.1463647 | -1.1733201 | - | C  | -2.0886181 | 0.2637078  |   |
|   | 0.6294969  |            |   |    | 6.1764248  |            |   |
| C | -6.5285269 | -1.2414872 | - | Au | -1.6208411 | -1.8653047 | - |
|   | 0.8206853  |            |   |    | 0.2274633  |            |   |
| C | -7.1681418 | -0.0941858 | - | O  | -1.7093581 | -4.5072271 |   |
|   | 1.3743246  |            |   |    | 1.9970201  |            |   |
| C | -6.4333293 | 0.9859693  | - | Cl | -1.2426635 | -5.0017682 |   |
|   | 1.9274973  |            |   |    | 0.6587019  |            |   |
| C | -5.0543438 | 1.0081952  | - | O  | -0.1499256 | -6.0247176 |   |
|   | 1.6620132  |            |   |    | 0.7559763  |            |   |
| C | -7.2908111 | -2.5405256 | - | C  | -5.2461274 | 4.4174779  |   |
|   | 0.4807521  |            |   |    | 3.7137493  |            |   |
| C | -8.0228626 | -3.0412225 | - | C  | -6.3035316 | 3.2956773  |   |
|   | 1.7478074  |            |   |    | 1.7639953  |            |   |
| O | -8.5515488 | -0.0788697 | - | C  | -1.7365621 | -1.4592710 |   |
|   | 1.3848143  |            |   |    | 4.4535098  |            |   |

C -0.0822259 0.4289074  
4.6761267  
C 3.0374387 2.0946428 -  
0.7411318  
C 3.0147205 3.4757314 -  
0.5397277  
C 4.0791831 4.2839299 -  
0.9457135  
C 5.2065423 3.6346704 -  
1.5232220  
C 5.1812968 2.2646478 -  
1.8964832  
C 4.0861582 1.5089721 -  
1.4478627  
C 3.9739703 5.8175029 -  
0.7975244  
C 2.5807201 6.2359381 -  
0.2829494  
O 6.3390104 4.4031641 -  
1.7396054  
C 7.3786757 4.1708270 -  
0.7664925  
C 6.2273914 1.5198345 -  
2.7632740  
C 7.1903285 2.4296885 -  
3.5538844  
C 4.1687868 6.4697273 -  
2.1861850  
C 5.0155168 6.3794799  
0.1948968  
C 5.4643375 0.6852574 -  
3.8265038  
C 7.0390661 0.5499478 -  
1.8737920  
O -0.5254129 -3.7206794 -  
0.1157111  
O -2.3858388 -5.4488308 -  
0.2085361  
C -8.3080733 -2.3288745  
0.6629686  
C -6.3260917 -3.6567969 -  
0.0317256  
C -6.0510401 2.2290027 -  
4.0699201

C -6.9335175 3.4661256 -  
2.0675565  
C 3.7639025 -4.0860256  
3.2712475  
C 2.4391149 -2.8363389  
5.0242707  
C 6.7255044 1.6234371  
2.6752167  
C 4.8577793 2.7640273  
3.9043769  
O 5.8460076 -3.9150401 -  
1.5563747  
O 4.2275871 -2.0325715 -  
1.8301972  
H -1.5277094 2.9875742  
5.3834102  
H -2.6044716 4.2308962  
4.6685459  
H -2.7891288 3.7636724  
6.3943636  
H 6.8568400 -2.6270396  
4.3917903  
H 6.1187137 -2.6210473  
2.7481874  
H 6.9712402 -1.1706169  
3.3544035  
H 8.1850163 4.8754984 -  
1.0021638  
H 7.0095872 4.3587444  
0.2539874  
H 7.7652260 3.1423408 -  
0.8221776  
H -8.8036934 0.4815252  
0.6266736  
H -8.8221302 1.8406103 -  
0.5413605  
H -10.2057252 0.7028805 -  
0.4744157  
H 1.6356758 -2.1082236  
5.2087135  
H 2.1252678 -3.8037090  
5.4462524  
H 3.3420943 -2.5026818  
5.5508426

H 1.5288690 -3.6984495  
1.7871874  
H 1.0984650 -4.4393269  
3.3347510  
H 0.5635035 -2.7902374  
2.9807738  
H 4.0502116 -4.1270293  
2.2112306  
H 4.6578564 -3.9264223  
3.8820192  
H 3.3387030 -5.0628776  
3.5495670  
H 3.9779731 2.6454313  
4.5548654  
H 5.5616057 3.4480623  
4.4009958  
H 4.5325930 3.2523481  
2.9754608  
H 6.7773536 0.0998194  
4.9799779  
H 6.6757907 1.7989922  
5.4622893  
H 5.2889322 0.7150577  
5.7286554  
H 7.2791434 0.6938353  
2.4795924  
H 6.3615328 2.0025121  
1.7083766  
H 7.4310423 2.3608474  
3.0885301  
H 4.9665467 5.8513331  
1.1596263  
H 4.8053826 7.4439098  
0.3819535  
H 6.0351852 6.3044292 -  
0.1969448  
H 1.7721367 5.8709577 -  
0.9339883  
H 2.5273398 7.3339254 -  
0.2643420  
H 2.3909923 5.8804692  
0.7418458  
H 3.4005366 6.1178656 -  
2.8919935

H 5.1570183 6.2370031 -  
2.6016709  
H 4.0745553 7.5632100 -  
2.1005142  
H 7.6220958 1.0897898 -  
1.1131360  
H 7.7417970 -0.0274492 -  
2.4940847  
H 6.3801526 -0.1585651 -  
1.3521412  
H 6.6427696 3.1903088 -  
4.1275172  
H 7.7487185 1.8018183 -  
4.2645168  
H 7.9254682 2.9409338 -  
2.9236520  
H 4.8191530 1.3304394 -  
4.4418549  
H 4.8469699 -0.1055591 -  
3.3819022  
H 6.1921123 0.1941407 -  
4.4898228  
H -7.5893072 3.4563047 -  
1.1849447  
H -7.2643823 4.2823483 -  
2.7276234  
H -5.9139211 3.7000877 -  
1.7262829  
H -8.4922184 0.9114463 -  
3.8621788  
H -8.5934732 2.6652842 -  
4.1493540  
H -9.1829671 1.9873778 -  
2.6269262  
H -6.0241327 1.2765991 -  
4.6197151  
H -5.0187704 2.5034131 -  
3.8131117  
H -6.4369295 3.0069229 -  
4.7450973  
H -5.5646628 -3.8814764 -  
0.7934486  
H -6.9059693 -4.5754085  
0.1385576

H -5.8148426 -3.4111824  
 0.9118112  
 H -8.7545367 -2.3056580 -  
 2.1037848  
 H -8.5544668 -3.9786254 -  
 1.5218118  
 H -7.3038857 -3.2436827 -  
 2.5559568  
 H -9.1489539 -1.7017460  
 0.3498522  
 H -7.8274785 -1.8683057  
 1.5394284  
 H -8.7133263 -3.3039777  
 0.9740813  
 H -6.5924911 2.3605736  
 1.2609397  
 H -7.2285858 3.8361604  
 2.0098914  
 H -5.7417704 3.9118559  
 1.0451545  
 H -5.9127830 2.0065214  
 4.9565617  
 H -7.3511818 2.7346322  
 4.1944176  
 H -6.6579454 1.2322504  
 3.5306878  
 H -4.9149910 4.3161060  
 4.7522316  
 H -4.4845163 4.9863836  
 3.1625493  
 H -6.1764420 5.0048244  
 3.7116454  
 H 0.0734427 1.5022460  
 4.8574365  
 H 0.4723557 -0.1266474  
 5.4469766  
 H 0.3629643 0.1842386  
 3.7011684  
 H -3.1704288 0.0915425  
 6.2532547  
 H -1.5792330 -0.4673130  
 6.8226884  
 H -1.8685741 1.2594188  
 6.5762099

H -2.7948978 -1.7553624  
 4.5048421  
 H -1.3533022 -1.7636563  
 3.4712423  
 H -1.1823501 -2.0312340  
 5.2127468  
 H 1.4945314 -1.5385024  
 1.5026967  
 H 3.9902518 1.9388463  
 1.5935012  
 H 2.1542332 3.9240417 -  
 0.0519044  
 H 4.0648944 0.4328066 -  
 1.6309607  
 H -4.6171413 -2.0085563 -  
 0.1712683  
 H -4.4620696 1.8606102 -  
 1.9957604  
 H -4.6054079 2.0584408  
 0.6747614  
 H -1.3352779 -0.3023032  
 2.1012815  
 H -1.5933914 0.9804606 -  
 5.1321761  
 H 1.3402318 4.7718620 -  
 4.1869350  
 H 2.1725043 3.1909736 -  
 3.7851175  
 H -2.8016894 -0.0526526 -  
 3.2214995  
 H 0.1814954 4.0878433  
 3.5750398  
 H -2.2558164 6.3019744  
 0.3931486  
 H -3.7465888 5.4684883  
 1.0371552  
 H 1.6100870 2.2886328  
 2.6074065

## 2. Int 1'

C 4.0111567 5.9024778  
 4.3564237

C 3.3760988 7.0672220  
 3.9060650  
 C 4.1206929 8.0188852  
 3.1905277  
 C 5.4721058 7.7986774  
 2.9159864  
 C 6.0994702 6.6307303  
 3.3691036  
 C 5.3687014 5.6871509  
 4.0959938  
 C 1.9197163 7.2979781  
 4.1885686  
 O 1.2059882 7.3041962  
 2.9102618  
 C -0.1225404 7.5829211  
 3.0048538  
 O -0.7162103 7.7704935  
 4.0684401  
 N -0.7362993 7.5898937  
 1.7875422  
 C -0.0987082 7.5777734  
 0.4737991  
 C -0.9191673 6.7688305 -  
 0.5681729  
 C -2.3765146 7.2646488 -  
 0.6659456  
 C -2.7428944 8.5677520 -  
 0.2839368  
 C -4.0592376 9.0215736 -  
 0.4254628  
 C -5.0404523 8.1835935 -  
 0.9604458  
 C -4.6859681 6.8938450 -  
 1.3689162  
 C -3.3712298 6.4459659 -  
 1.2264741  
 C -0.2795027 6.9718878 -  
 1.9632849  
 C 0.0775065 5.9007038 -  
 2.7988388  
 C 0.6341940 6.1257214 -  
 4.0621899  
 C 0.8513808 7.4257749 -  
 4.5201477

C 0.4882910 8.5035464 -  
 3.7053952  
 C -0.0775888 8.2769208 -  
 2.4494793  
 C -0.8433395 5.2538480 -  
 0.1960885  
 C -1.2684489 4.8696395  
 1.1953409  
 Au -1.2351898 2.5122564  
 1.1394780  
 Ag -3.7343588 0.8387254  
 0.8688620  
 O -4.4914103 2.5774783 -  
 0.4326619  
 Cl -4.1581508 2.6395289 -  
 1.9651088  
 O -5.0410865 3.7018094 -  
 2.5720672  
 C -2.5144224 4.3852909  
 1.5473000  
 P 0.2508137 0.8028695  
 0.5567302  
 C 1.4467721 1.6425148 -  
 0.5645282  
 C 1.4967460 1.3065995 -  
 1.9125239  
 C 2.3228853 1.9879031 -  
 2.8215070  
 C 3.2000597 2.9558414 -  
 2.2787245  
 C 3.0594621 3.4372626 -  
 0.9431921  
 C 2.1728033 2.7539794 -  
 0.1063316  
 C 2.1266616 1.6392681 -  
 4.3186478  
 C 2.6094059 0.1988416 -  
 4.5964321  
 O 4.2138996 3.4960787 -  
 3.0492196  
 C 5.3311121 2.6002084 -  
 3.2210614  
 C 3.8029296 4.6907849 -  
 0.4333575

C 3.3089847 5.0993877  
0.9641123  
C 1.1416100 0.2577803  
2.0656059  
C 0.3844240 -0.1104377  
3.1882956  
C 1.0041777 -0.4568591  
4.3925738  
C 2.4271161 -0.3922277  
4.4405053  
C 3.1946352 0.1716307  
3.3938796  
C 2.5224059 0.4084161  
2.1825861  
C 0.1609300 -0.7626446  
5.6488955  
C 0.4776711 -2.1430947  
6.2655720  
O 3.0464514 -0.8377242  
5.5944741  
C 3.7124154 -2.1053482  
5.4380280  
C 4.6696716 0.6460343  
3.4907295  
C 5.2189087 0.7727593  
4.9276491  
C -0.4715106 -0.5497585 -  
0.4630638  
C 0.1192922 -1.8393573 -  
0.6338155  
C -0.4406036 -2.6262363 -  
1.6312000  
C -1.5623205 -2.2376287 -  
2.3770021  
C -2.1509648 -1.0005671 -  
2.2106174  
C -1.5720178 -0.1626459 -  
1.2436076  
O -1.8810726 -3.2158602 -  
3.2776020  
C -1.0500872 -4.3492201 -  
2.9111546  
O 0.0145814 -3.8361911 -  
2.0819612

C 1.2915774 -2.3271501  
0.1402789  
C 1.2044792 -3.0924362  
1.3437922  
C 2.3628965 -3.4179567  
2.0588983  
C 3.6503044 -3.0874046  
1.5998483  
C 3.7235016 -2.4151313  
0.3968900  
C 2.5715845 -2.0415741 -  
0.3032743  
O 2.9204118 -1.4086099 -  
1.4694128  
C 4.3314895 -1.1373603 -  
1.3384242  
O 4.8361246 -2.0125778 -  
0.2971392  
P -0.4106494 -3.8626338  
1.7908670  
C -0.5445297 -5.2896011  
0.6359710  
C -1.7906795 -5.8789640  
0.4476438  
C -1.9478998 -7.0721654 -  
0.2754302  
C -0.7865904 -7.5841888 -  
0.9117025  
C 0.5153381 -7.0737974 -  
0.6365248  
C 0.5993916 -5.9123613  
0.1346249  
C -3.3598925 -7.7118390 -  
0.2463761  
C -3.4300589 -9.1751217 -  
0.7281036  
O -0.8846802 -8.6354643 -  
1.8085399  
C -1.3956895 -8.2454676 -  
3.0993052  
C 1.8088174 -7.7708994 -  
1.1106771  
C 3.0627183 -7.0736111 -  
0.5440184



|    |            |            |    |            |              |
|----|------------|------------|----|------------|--------------|
| C  | -1.3426610 | -0.7307257 | O  | -2.9980539 | 1.2491282    |
|    | 5.3295660  |            |    | 3.2232999  |              |
| C  | 0.4371361  | 0.3427832  | Cl | -4.1579297 | 1.9274442    |
|    | 6.6966794  |            |    | 3.9975070  |              |
| C  | 5.6052425  | -0.2629312 | O  | -3.6596245 | 3.2429430    |
|    | 2.6691635  |            |    | 4.5698852  |              |
| C  | 4.7391955  | 2.0728479  | O  | -4.6190380 | 1.0114764    |
|    | 2.8910413  |            |    | 5.1084450  |              |
| C  | -0.3007196 | -4.7612997 | O  | -5.2893543 | 2.1822552    |
|    | 3.3878120  |            |    | 3.0058528  |              |
| C  | 0.6674243  | -5.7465424 | C  | -3.8427770 | -7.7337347   |
|    | 3.5798783  |            |    | 1.2297340  |              |
| C  | 0.6581088  | -6.5962313 | C  | -4.3408233 | -6.8495919 - |
|    | 4.6934618  |            |    | 1.0717054  |              |
| C  | -0.4904522 | -6.5383272 | C  | 1.8185278  | -9.2285491 - |
|    | 5.5247571  |            |    | 0.5946847  |              |
| C  | -1.4535352 | -5.4964276 | C  | 1.9375483  | -7.7583068 - |
|    | 5.4110710  |            |    | 2.6499716  |              |
| C  | -1.3221394 | -4.6141391 | C  | 0.6051061  | 1.7201131 -  |
|    | 4.3326255  |            |    | 4.6189128  |              |
| C  | 1.9181419  | -7.4763921 | C  | 2.8067782  | 2.6010630 -  |
|    | 4.8939356  |            |    | 5.3135048  |              |
| C  | 1.9770082  | -8.5750131 | C  | 5.3270129  | 4.4516433 -  |
|    | 3.8093363  |            |    | 0.3338337  |              |
| O  | -0.7052890 | -7.5057003 | C  | 3.5309761  | 5.8854586 -  |
|    | 6.4893898  |            |    | 1.3769852  |              |
| C  | -1.1445548 | -8.7714412 | O  | -2.6891297 | 2.9988369 -  |
|    | 5.9500318  |            |    | 2.1136275  |              |
| C  | -2.5995613 | -5.3055266 | O  | -4.4307971 | 1.2838298 -  |
|    | 6.4300968  |            |    | 2.5784618  |              |
| C  | -3.4168325 | -4.0338197 | H  | -2.3931272 | -7.7876596 - |
|    | 6.1278327  |            |    | 3.0224889  |              |
| Au | -2.2960868 | -2.5773359 | H  | -0.7128554 | -7.5355718 - |
|    | 1.6436369  |            |    | 3.5929732  |              |
| Cl | -4.4254232 | -1.5364015 | H  | -1.4613726 | -9.1623527 - |
|    | 1.3568574  |            |    | 3.6965304  |              |
| C  | 2.0504856  | -8.1145823 | H  | 4.1972892  | -2.3229167   |
|    | 6.2916428  |            |    | 6.3968339  |              |
| C  | 3.1634373  | -6.5629123 | H  | 2.9848835  | -2.8998128   |
|    | 4.7310890  |            |    | 5.2056009  |              |
| C  | -2.0070146 | -5.1493384 | H  | 4.4727493  | -2.0700839   |
|    | 7.8499525  |            |    | 4.6431217  |              |
| C  | -3.5876564 | -6.4937211 | H  | 5.0337327  | 1.6731986 -  |
|    | 6.4055736  |            |    | 3.7345662  |              |

H 6.0657545 3.1358488 -  
3.8336114  
H 5.7789665 2.3433972 -  
2.2476200  
H -1.3497364 -9.4173688  
6.8118397  
H -0.3725457 -9.2369291  
5.3204512  
H 5.7899476 4.3649725 -  
1.3228624  
H 5.7940132 5.3026046  
0.1854795  
H 5.5526789 3.5437524  
0.2446759  
H 2.4561039 6.1087921 -  
1.4308803  
H 4.0449532 6.7785144 -  
0.9893395  
H 3.8895520 5.6904926 -  
2.3944288  
H 2.2260895 5.2892577  
0.9871632  
H 3.5428051 4.3526025  
1.7332823  
H 3.8056820 6.0312131  
1.2622497  
H 2.1044183 -0.5305722 -  
3.9473251  
H 2.4014814 -0.0696457 -  
5.6432088  
H 3.6936223 0.0995716 -  
4.4335734  
H 0.2124327 2.7231272 -  
4.3931753  
H 0.4331569 1.5163102 -  
5.6860041  
H 0.0143893 0.9943613 -  
4.0446333  
H 2.5666965 3.6499829 -  
5.0932296  
H 3.8974746 2.5013661 -  
5.3352135  
H 2.4363518 2.3701477 -  
6.3236850

H 5.4076784 -0.1933568  
5.4073257  
H 6.1786688 1.3089878  
4.8794897  
H 4.5384673 1.3484323  
5.5697087  
H 5.2996320 -0.3109900  
1.6149481  
H 6.6315269 0.1325527  
2.7044221  
H 5.6270527 -1.2896724  
3.0598302  
H 4.4915283 2.0970065  
1.8223756  
H 4.0525254 2.7534081  
3.4157228  
H 5.7601332 2.4688809  
2.9960785  
H 0.4249320 -2.9430977  
5.5137044  
H -0.2727593 -2.3689052  
7.0377105  
H 1.4623455 -2.1649466  
6.7425658  
H -1.6736950 0.2421101  
4.9480996  
H -1.9091319 -0.9351221  
6.2493093  
H -1.6267091 -1.4922781  
4.5869255  
H 0.1691273 1.3320151  
6.2957802  
H 1.4935063 0.3560943  
6.9939642  
H -0.1739841 0.1619796  
7.5947529  
H -4.3766249 -5.8148216 -  
0.6994186  
H -5.3563984 -7.2686847 -  
1.0067169  
H -4.0578776 -6.8164882 -  
2.1343438  
H -3.1396831 -8.2960428  
1.8624098

H -4.8244705 -8.2267345  
1.2815551  
H -3.9586331 -6.7298604  
1.6600328  
H 3.0640975 -7.0491636  
0.5565412  
H 3.9531571 -7.6346490 -  
0.8616689  
H 3.1723821 -6.0434306 -  
0.9164039  
H 0.9703967 -9.7987702 -  
0.9923180  
H 2.7504314 -9.7259726 -  
0.9048447  
H 1.7710447 -9.2520730  
0.5048835  
H 1.1979238 -8.4109821 -  
3.1251455  
H 1.8202884 -6.7383826 -  
3.0478490  
H 2.9367680 -8.1192662 -  
2.9377467  
H -2.7936534 -3.1289926  
6.1334707  
H -4.1829807 -3.9141060  
6.9072265  
H -3.9375189 -4.0921802  
5.1597496  
H -1.4396389 -6.0395899  
8.1469147  
H -2.8208770 -4.9953242  
8.5751944  
H -1.3396912 -4.2758956  
7.8986277  
H -3.1428065 -7.4057121  
6.8160745  
H -3.9352083 -6.6980452  
5.3813474  
H -4.4681732 -6.2460253  
7.0183158  
H 1.1310436 -9.2728667  
3.8881915  
H 2.9073467 -9.1539905  
3.9095683

H 1.9556449 -8.1402167  
2.7984543  
H 1.9276335 -7.3654595  
7.0858778  
H 3.0597356 -8.5442711  
6.3798982  
H 1.3348070 -8.9227396  
6.4714115  
H 3.1300321 -5.7237170  
5.4427678  
H 3.2616926 -6.1508817  
3.7172949  
H 4.0732334 -7.1469799  
4.9316159  
H -2.6655346 -5.4110202  
0.9027080  
H 1.5714745 -5.4649636  
0.3281661  
H 1.4481032 -5.8859087  
2.8336186  
H -2.0527085 -3.8189032  
4.1911096  
H -0.7037375 -0.1068444  
3.1195390  
H 3.0881737 0.7691747  
1.3247571  
H 0.8679875 0.4984809 -  
2.2801060  
H 2.0454354 3.0825260  
0.9247619  
H 4.5413156 -3.3618545  
2.1623624  
H 4.4721138 -0.0862367 -  
1.0264346  
H 4.8395157 -1.3628551 -  
2.2820286  
H 2.2759467 -3.9465659  
3.0060093  
H -3.0038256 -0.6694124 -  
2.8005688  
H -1.6539086 -5.0604606 -  
2.3231201  
H -0.6248549 -4.7950452 -  
3.8166599

H -2.7869903 4.2826489  
 2.6006804  
 H 0.6390462 9.5284959 -  
 4.0505532  
 H -0.3806165 9.1379614 -  
 1.8511700  
 H 3.4349883 5.1562710  
 4.9095730  
 H 1.5059202 6.5058298  
 4.8279003  
 H -3.3200184 4.3181229  
 0.8120360  
 H -0.5497935 5.0537232  
 1.9982903  
 H 5.8530913 4.7754729  
 4.4511444  
 H 0.8947019 7.1240345  
 0.5745824  
 H -1.7135505 7.8713350  
 1.8286980  
 H -2.0022808 9.2611263  
 0.1187426  
 H 1.2907819 7.5994603 -  
 5.5043378  
 H -4.3127682 10.0365875 -  
 0.1127950  
 H -3.1250407 5.4451726 -  
 1.5810142  
 H -6.0688578 8.5341502 -  
 1.0661415  
 H 0.0619771 8.6083626  
 0.1240098  
 H -5.4303155 6.2231484 -  
 1.8018556  
 H 7.1565242 6.4591168  
 3.1557932  
 H 3.6329357 8.9302278  
 2.8363629  
 H 0.9013583 5.2727997 -  
 4.6895058  
 H -0.0666566 4.8681053 -  
 2.4814823  
 H 6.0403981 8.5400649  
 2.3505443

H 0.2077366 4.9503260 -  
 0.3231557  
 H -1.4297134 4.6736523 -  
 0.9179263  
 H 1.7514785 8.2679264  
 4.6799025  
 H -1.9531282 0.8580921 -  
 1.1566047  
 H -4.4280501 -9.5692984 -  
 0.4828941  
 H -3.2951317 -9.2850045 -  
 1.8092388  
 H -2.6826431 -9.8010859 -  
 0.2219893  
 H -2.0617093 -8.6447825  
 5.3542021

### 3. Int 2a'

Au -1.5541307 -2.3098405  
 0.7246584  
 Cl -3.2790870 -0.9931030  
 1.7392295  
 Ag -2.0235471 1.0950816  
 2.3622624  
 O -3.8690436 2.1865284 -  
 0.2397528  
 Cl -4.7951558 2.7909452  
 0.7980996  
 O -6.1887667 2.2245294  
 0.6662271  
 P -0.0705788 -3.7769706 -  
 0.2217339  
 C 0.1597627 -5.2547916  
 0.8491844  
 C 0.8995692 -6.3477728  
 0.3977126  
 C 0.9493454 -7.5594074  
 1.0999283  
 C 0.0646957 -7.6886948  
 2.2025237  
 C -0.6346546 -6.5739281  
 2.7445006

|   |            |            |    |            |            |   |
|---|------------|------------|----|------------|------------|---|
| C | -0.5569002 | -5.3640275 | O  | -2.0638954 | -1.3725893 | - |
|   | 2.0452355  |            |    | 4.5929692  |            |   |
| C | 1.9879501  | -8.5987263 | C  | -1.2878510 | -2.5665305 | - |
|   | 0.6037911  |            |    | 4.8722131  |            |   |
| C | 3.3369958  | -7.8592877 | O  | -0.0591243 | -2.4546798 | - |
|   | 0.3936071  |            |    | 4.1243625  |            |   |
| O | -0.1347033 | -8.9212177 | P  | 1.0801256  | 0.7929620  | - |
|   | 2.7989412  |            |    | 0.0487317  |            |   |
| C | -0.9629946 | -9.8111294 | C  | 2.1041745  | -0.2760408 |   |
|   | 2.0191301  |            |    | 1.0337010  |            |   |
| C | -1.4353870 | -6.6530726 | C  | 1.4760994  | -0.8422449 |   |
|   | 4.0634738  |            |    | 2.1504530  |            |   |
| C | -2.6249419 | -7.6339799 | C  | 2.1874729  | -1.5957271 |   |
|   | 3.9560083  |            |    | 3.0845569  |            |   |
| C | 1.5775311  | -3.1516481 | C  | 3.5871435  | -1.7430169 |   |
|   | 0.7622485  |            |    | 2.8693412  |            |   |
| C | 1.6324371  | -2.0660700 | C  | 4.2807238  | -1.0099515 |   |
|   | 1.6907935  |            |    | 1.8766383  |            |   |
| C | 2.8693841  | -1.8223470 | C  | 3.4909727  | -0.3486223 |   |
|   | 2.2608004  |            |    | 0.9198377  |            |   |
| C | 4.0217762  | -2.5375264 | C  | 1.4930593  | -2.1088547 |   |
|   | 1.9150072  |            |    | 4.3641394  |            |   |
| C | 3.9943264  | -3.5420801 | C  | 2.1280261  | -1.3866430 |   |
|   | 0.9691845  |            |    | 5.5766745  |            |   |
| C | 2.7435455  | -3.8344435 | O  | 4.2801256  | -2.5931664 |   |
|   | 0.3979162  |            |    | 3.7175825  |            |   |
| O | 3.1671609  | -0.9112616 | C  | 4.6357167  | -3.8408997 |   |
|   | 3.2433366  |            |    | 3.0929173  |            |   |
| C | 4.6079151  | -0.8616894 | C  | 5.8158689  | -0.7830005 |   |
|   | 3.2762500  |            |    | 1.8108940  |            |   |
| O | 5.0866235  | -2.0801237 | C  | 6.0526963  | 0.7403599  |   |
|   | 2.6503683  |            |    | 1.6448338  |            |   |
| C | 0.4476287  | -1.2362295 | Au | -0.1152556 | 2.5696573  |   |
|   | 2.0333879  |            |    | 0.9764406  |            |   |
| C | 0.0140799  | -0.1171157 | C  | -1.2409454 | 4.2917348  |   |
|   | 1.2546921  |            |    | 1.4486825  |            |   |
| C | -1.1918821 | 0.5314560  | C  | -1.3360583 | 5.1390274  |   |
|   | 1.5624226  |            |    | 0.2037120  |            |   |
| C | -1.9958577 | 0.1662911  | N  | -2.6615218 | 6.0214869  |   |
|   | 2.6545184  |            |    | 0.1913889  |            |   |
| C | -1.5234064 | -0.8634061 | C  | -3.0182981 | 6.3036333  | - |
|   | 3.4424917  |            |    | 1.2614041  |            |   |
| C | -0.3273201 | -1.5326076 | C  | -1.9369830 | 5.5965410  | - |
|   | 3.1442825  |            |    | 2.1276143  |            |   |

C -1.4807279 4.4780575 -  
1.1606412  
C -2.4977007 7.1669056  
1.1150722  
O -2.9591169 7.1263105  
2.2300880  
C -0.7916731 6.5679065 -  
2.4687268  
C 0.5540598 6.1694354 -  
2.4570555  
C 1.5725615 7.0533506 -  
2.8271903  
C 1.2700674 8.3603740 -  
3.2126781  
C -0.0664250 8.7700794 -  
3.2396395  
C -1.0801344 7.8812328 -  
2.8765438  
C -2.5554283 4.9768595 -  
3.3952935  
C -3.6130217 4.0551294 -  
3.2773175  
C -4.1456064 3.4224202 -  
4.4013971  
C -3.6343649 3.6996499 -  
5.6745203  
C -2.5908196 4.6176232 -  
5.8057748  
C -2.0580024 5.2505649 -  
4.6764707  
O -1.7378681 8.0804083  
0.5389762  
C -1.0504970 9.0422317  
1.4526538  
C 0.1990767 8.3840062  
1.9561958  
C 0.1830016 7.6444682  
3.1511495  
C 1.3224313 6.9501629  
3.5659293  
C 2.4899833 7.0038740  
2.7981013  
C 2.5164078 7.7470662  
1.6123750

C 1.3730277 8.4262265  
1.1865471  
C 2.2224599 1.7688543 -  
1.1191100  
C 2.0275156 1.8653474 -  
2.4928929  
C 2.7904739 2.7261455 -  
3.3009247  
C 3.8521427 3.4174705 -  
2.6652998  
C 3.9853092 3.4566916 -  
1.2450954  
C 3.1511337 2.6201994 -  
0.4995989  
C 2.3581583 2.8524169 -  
4.7852941  
C 2.8888896 4.1112314 -  
5.5021960  
O 4.7847386 4.1241453 -  
3.4080854  
C 5.7671571 3.2868639 -  
4.0493039  
C 4.9540398 4.4222595 -  
0.5250896  
C 4.6843076 5.8698273 -  
0.9932604  
C 2.7715608 1.5888120 -  
5.5713801  
C 0.8118870 2.9622355 -  
4.8400070  
C 4.7370494 4.3976368  
1.0013191  
C 6.4308819 4.0562870 -  
0.7914353  
C 1.6239272 -3.6369551  
4.5444467  
C -0.0104553 -1.7748616  
4.3603646  
C 6.5933071 -1.1897615  
3.0801350  
C 6.4360839 -1.4988989  
0.5946377  
C -0.7766109 -4.5722894 -  
1.7240277

|                           |                           |
|---------------------------|---------------------------|
| C -2.1466812 -4.8105661 - | H -2.3367072 -5.1785569 - |
| 1.7657323                 | 6.3223760                 |
| C -2.7343082 -5.6166794 - | H -3.5018752 -6.5101957 - |
| 2.7538218                 | 6.6042785                 |
| C -1.8787860 -6.0720891 - | H 5.1935130 -4.4168196    |
| 3.7923658                 | 3.8408991                 |
| C -0.4615766 -5.9288437 - | H 3.7323455 -4.3997440    |
| 3.7233256                 | 2.7970247                 |
| C 0.0574627 -5.1627255 -  | H 5.2661996 -3.6847636    |
| 2.6762142                 | 2.2043489                 |
| C -4.2334614 -5.9601505 - | H 5.3201948 2.6667604 -   |
| 2.5568129                 | 4.8404203                 |
| C -5.0971945 -4.7094045 - | H 6.5063646 3.9633990 -   |
| 2.8324310                 | 4.4948397                 |
| O -2.4013740 -6.7239376 - | H 6.2638668 2.6312956 -   |
| 4.8971246                 | 3.3158558                 |
| C -3.0590892 -5.8575850 - | H -1.0965406 -10.7156472  |
| 5.8425977                 | 2.6241200                 |
| C 0.5010809 -6.6195908 -  | H -0.4885094 -10.0782541  |
| 4.7145490                 | 1.0637336                 |
| C 0.3341331 -6.0784584 -  | H 6.7127138 4.2379758 -   |
| 6.1513849                 | 1.8339148                 |
| C -4.7532637 -7.1441665 - | H 7.0810431 4.6752017 -   |
| 3.3987089                 | 0.1542225                 |
| C -4.4388507 -6.3814129 - | H 6.6292346 3.0011431 -   |
| 1.0758137                 | 0.5510677                 |
| C 1.9740864 -6.3951945 -  | H 3.6456475 6.1548110 -   |
| 4.3168384                 | 0.7716204                 |
| C 0.2437898 -8.1444643 -  | H 5.3485201 6.5633467 -   |
| 4.6976319                 | 0.4545441                 |
| C 1.5413593 -9.1861060 -  | H 4.8617363 5.9865067 -   |
| 0.7529442                 | 2.0690376                 |
| C 2.2887285 -9.7441911    | H 3.7014677 4.6491244     |
| 1.5925003                 | 1.2735420                 |
| C -2.0196196 -5.2808220   | H 4.9885148 3.4238495     |
| 4.4537355                 | 1.4454436                 |
| C -0.4904345 -7.1021270   | H 5.3943045 5.1485259     |
| 5.2027423                 | 1.4635525                 |
| O -4.2462084 2.5245957    | H 2.3430278 0.6838998 -   |
| 2.2016409                 | 5.1178320                 |
| O -4.8599244 4.3192933    | H 2.4107694 1.6604052 -   |
| 0.5849996                 | 6.6087940                 |
| H -3.8513438 -5.2598465 - | H 3.8637893 1.4638656 -   |
| 5.3690884                 | 5.6045770                 |

H 0.4519912 3.8190066 -  
4.2540334  
H 0.4969596 3.1145449 -  
5.8824063  
H 0.2969137 2.0627774 -  
4.4760563  
H 2.6752847 5.0199132 -  
4.9217580  
H 3.9645462 4.0786388 -  
5.7017741  
H 2.3750942 4.1993993 -  
6.4713479  
H 6.6654843 -2.2745006  
3.2136569  
H 7.6191416 -0.8005102  
2.9908548  
H 6.1421387 -0.7617303  
3.9852229  
H 5.9702123 -1.1766068 -  
0.3464081  
H 7.5108093 -1.2677002  
0.5349890  
H 6.3299572 -2.5906031  
0.6662636  
H 5.6400805 1.1322071  
0.7057175  
H 5.5979469 1.2993414  
2.4763181  
H 7.1331857 0.9465694  
1.6396998  
H 1.2864054 -4.1772810  
3.6476933  
H 0.9909291 -3.9562685  
5.3867121  
H 2.6519469 -3.9353709  
4.7713006  
H -0.1987528 -0.6929309  
4.3107774  
H -0.4609422 -2.1449623  
5.2925615  
H -0.5380854 -2.2560918  
3.5214981  
H 1.9979961 -0.2984562  
5.4844207

H 3.1992830 -1.6138579  
5.6559623  
H 1.6344189 -1.7154360  
6.5046905  
H -4.8004360 -3.8692055 -  
2.1869029  
H -6.1564991 -4.9332560 -  
2.6338606  
H -5.0122217 -4.3765241 -  
3.8773172  
H -3.7876386 -7.2295243 -  
0.8158939  
H -5.4840596 -6.6915227 -  
0.9299554  
H -4.2396943 -5.5691197 -  
0.3642853  
H 2.1976116 -6.7762777 -  
3.3084757  
H 2.6178747 -6.9394871 -  
5.0221837  
H 2.2592174 -5.3329735 -  
4.3603768  
H -0.7752243 -8.3816543 -  
5.0246523  
H 0.9540676 -8.6481702 -  
5.3714435  
H 0.3887760 -8.5517939 -  
3.6855658  
H -0.6286220 -6.3654046 -  
6.5861675  
H 0.4247829 -4.9817656 -  
6.1748206  
H 1.1267016 -6.4933120 -  
6.7928893  
H -1.2408296 -4.5156702  
4.5764532  
H -2.5397889 -5.3798162  
5.4172900  
H -2.7540789 -4.9173148  
3.7183759  
H -0.0719392 -8.0966016  
5.0034140  
H -1.0461178 -7.1422494  
6.1523635



H 0.3390291 -6.3895820  
5.3228934  
H -2.2923370 -8.6751108  
3.8988754  
H -3.2452254 -7.4091416  
3.0750849  
H -3.2593237 -7.5336072  
4.8497900  
H 0.5997854 -9.7471929 -  
0.6678296  
H 2.3119208 -9.8699777 -  
1.1405757  
H 1.3874219 -8.3913784 -  
1.4979870  
H 2.5277730 -9.3571806  
2.5924446  
H 3.1649185 -10.2982059  
1.2224978  
H 1.4680896 -10.4623396  
1.6913535  
H 3.6663118 -7.3696412  
1.3227860  
H 3.2888467 -7.0970341 -  
0.3968145  
H 4.1082277 -8.5845765  
0.0965790  
H -2.7728346 -4.3856708 -  
0.9793744  
H 1.1308623 -4.9996229 -  
2.6093342  
H 1.4546262 -6.2687431 -  
0.5358971  
H -1.1029014 -4.4939379  
2.4071686  
H 0.4119114 -0.6612504  
2.2981730  
H 3.9790854 0.1662999  
0.0927625  
H 1.2508427 1.2620355 -  
2.9569427  
H 3.2167563 2.6225107  
0.5877577  
H 4.8906922 -4.0909444 -  
0.6847032

H 4.9557927 0.0071242 -  
2.6875464  
H 4.9524924 -0.8261054 -  
4.3149026  
H 2.6909849 -4.6239442  
0.3497497  
H -2.9288402 0.6856628 -  
2.8717324  
H -1.8485557 -3.4463811 -  
4.5150429  
H -1.0616762 -2.6112418 -  
5.9431011  
H -0.7736533 4.8302679  
2.2823923  
H -0.3249365 9.7849654 -  
3.5487392  
H -2.1149202 8.2240925 -  
2.9343688  
H -0.7293335 7.6043669  
3.7493249  
H -1.7481804 9.3184032  
2.2517347  
H -2.2332518 3.9514984  
1.7804771  
H -0.5233007 5.8795076  
0.1637255  
H 1.2931716 6.3567898  
4.4811565  
H -3.0787495 7.3833518 -  
1.4108660  
H -3.4150765 5.4079832  
0.5839743  
H -4.0217260 3.8029505 -  
2.2959828  
H 2.0664611 9.0511701 -  
3.4961228  
H -4.9618810 2.7070081 -  
4.2803582  
H -1.2354470 5.9550891 -  
4.8008751  
H -4.0472574 3.2020124 -  
6.5543110  
H -4.0098106 5.8656916 -  
1.4155127



C -3.7476658 7.1429409  
10.8883486  
O -3.8998229 8.5157146  
10.4406547  
P 0.4806787 11.0316703  
13.5859560  
C 1.8287005 10.7813004  
12.3548057  
C 1.5765044 10.2724859  
11.0853572  
C 2.5643680 10.2350700  
10.0852393  
C 3.8660749 10.6447378  
10.4633777  
C 4.1229572 11.3056967  
11.7007851  
C 3.0800457 11.3565913  
12.6272752  
C 2.1082346 9.8001861  
8.6687146  
C 0.7704189 10.5133366  
8.3486249  
O 4.9431947 10.4543258  
9.6117384  
C 5.4217614 9.0946075  
9.5913607  
C 5.4577605 12.0242661  
11.9937597  
C 6.6459986 11.0399794  
12.0686973  
C -7.4800795 6.7815951  
14.2256268  
C -7.6496015 7.2649754  
15.6921504  
O -6.4027214 4.2873823  
12.7968544  
C -6.7550944 4.7461969  
11.4766069  
C -3.7057748 3.2830129  
13.2308336  
C -4.5510427 2.2369547  
13.9943271  
Au -3.1544038 10.1650371  
15.3319899

Cl -4.0439670 12.3787268  
15.1384040  
Ag -1.9738177 13.8020433  
15.0730153  
O -1.0175926 14.9962861  
16.8424507  
Cl 0.5251484 15.2151615  
17.0050125  
O 1.2456105 13.9519742  
16.5875458  
Au 0.2992005 13.3929475  
13.5250700  
C 0.1918937 15.4422183  
13.0161248  
C -0.1944257 15.4109753  
11.5681565  
N -0.5020649 16.8394465  
10.9203923  
C -0.4354463 16.6011330  
9.4324309  
C 0.5368048 15.4050244  
9.1643230  
C 0.8274856 14.8427586  
10.5947972  
C 0.3735936 17.8953974  
11.4785201  
O 1.5413233 17.8393088  
10.8692109  
C 2.6347453 18.7117741  
11.3807547  
C 3.4898324 17.9177479  
12.3201984  
C 3.1382239 17.8032390  
13.6749914  
C 3.9031419 17.0139859  
14.5364094  
C 5.0352136 16.3497870  
14.0533668  
C 5.3928974 16.4620459  
12.7052148  
C 4.6169674 17.2347934  
11.8383996  
C 1.8686861 15.7918783  
8.5076007

C 2.9328231 14.8743109  
8.5792258  
C 4.1715714 15.1555405  
8.0023129  
C 4.3753902 16.3660525  
7.3308936  
C 3.3220686 17.2776493  
7.2347995  
C 2.0797536 16.9885946  
7.8126585  
C -0.2197872 14.3863983  
8.2822024  
C -1.2789764 13.6299890  
8.8160483  
C -2.0021201 12.7410720  
8.0192979  
C -1.6888031 12.5913975  
6.6645895  
C -0.6443427 13.3409154  
6.1199796  
C 0.0818287 14.2294186  
6.9215596  
O -3.1724184 15.7415109  
13.7811221  
Cl -3.7650244 15.5363836  
12.3851136  
O -3.2615055 16.6780879  
11.4749955  
O -3.2996362 14.2055600  
11.8191080  
O -5.2729864 15.5900890  
12.4430868  
C -2.8388351 7.3347807  
17.2305692  
C -2.6719481 5.9822180  
17.5264860  
C -3.0896690 5.4262714  
18.7430351  
C -3.8612074 6.2630265  
19.5907725  
C -3.9772116 7.6634292  
19.3662710  
C -3.4438121 8.1697398  
18.1756508

C -2.6371747 3.9704423  
19.0241131  
C -2.7657906 3.5227211  
20.4944216  
O -4.5215801 5.7346344  
20.6856869  
C -5.7074422 4.9867010  
20.3422304  
C -4.6395218 8.6191273  
20.3837068  
C -3.9098605 8.5034219  
21.7424695  
C -1.1248737 3.8683527  
18.6868609  
C -3.4043408 2.9904348  
18.1090609  
C -6.1414565 8.3059618  
20.5702166  
C -4.5402933 10.0871404  
19.9256729  
C 1.0373141 10.3097431  
15.1772429  
C 0.3399922 10.6944831  
16.3294058  
C 0.7383937 10.2738967  
17.5985966  
C 1.9041600 9.4604896  
17.6769841  
C 2.7470384 9.2382473  
16.5614534  
C 2.2341035 9.6076036  
15.3054572  
C 0.0165798 10.8043231  
18.8561548  
C -1.1890953 11.6861341  
18.4805078  
O 2.2369253 8.9371942  
18.9167571  
C 1.9555914 7.5292564  
19.0287712  
C 4.2132165 8.7270007  
16.6067635  
C 4.3378975 7.3182960  
15.9941272

|   |            |            |   |            |            |
|---|------------|------------|---|------------|------------|
| C | 1.0125377  | 11.6880989 | H | 6.3212599  | 9.0922507  |
|   | 19.6441424 |            |   | 8.9642826  |            |
| C | -0.5048523 | 9.6748466  | H | 5.6797960  | 8.7541521  |
|   | 19.7713689 |            |   | 10.6069941 |            |
| C | 5.0708402  | 9.6995981  | H | -6.1831397 | 4.7132812  |
|   | 15.7560536 |            |   | 21.2916280 |            |
| C | 4.8580888  | 8.7203583  | H | -5.4658673 | 4.0731807  |
|   | 18.0089516 |            |   | 19.7799858 |            |
| O | -0.0130943 | 18.6126339 | H | 6.8800459  | 10.6061708 |
|   | 12.3694394 |            |   | 11.0909962 |            |
| C | 3.0713051  | 10.2001010 | H | 7.5406216  | 11.5755242 |
|   | 7.5309997  |            |   | 12.4216642 |            |
| C | 1.8595105  | 8.2762231  | H | 6.4400776  | 10.2238658 |
|   | 8.6308900  |            |   | 12.7773396 |            |
| C | 5.7135090  | 13.0736455 | H | 4.9053061  | 13.8202089 |
|   | 10.8866415 |            |   | 10.8669841 |            |
| C | 5.4046995  | 12.7796440 | H | 6.6566800  | 13.6047795 |
|   | 13.3353741 |            |   | 11.0882914 |            |
| C | -7.8022245 | 7.9598643  | H | 5.7842053  | 12.6046020 |
|   | 13.2806624 |            |   | 9.8979962  |            |
| C | -8.5267818 | 5.6648517  | H | 4.5986205  | 13.5274648 |
|   | 14.0344415 |            |   | 13.3609131 |            |
| C | -3.8131783 | 3.0327559  | H | 5.2812261  | 12.1011365 |
|   | 11.7102278 |            |   | 14.1912750 |            |
| C | -2.2309411 | 3.0597483  | H | 6.3540211  | 13.3168099 |
|   | 13.6234418 |            |   | 13.4754154 |            |
| O | 0.9416265  | 16.3906703 | H | 1.1113852  | 7.9793130  |
|   | 16.1484838 |            |   | 9.3796681  |            |
| O | 0.7779789  | 15.5123579 | H | 1.4880956  | 7.9829686  |
|   | 18.4728384 |            |   | 7.6369980  |            |
| H | -7.1883858 | 5.7571300  | H | 2.7788055  | 7.7048733  |
|   | 11.4962417 |            |   | 8.8266128  |            |
| H | -5.8754120 | 4.7468928  | H | 0.8770046  | 11.6056402 |
|   | 10.8138127 |            |   | 8.4044259  |            |
| H | -7.4991592 | 4.0390972  | H | 0.4598777  | 10.2585460 |
|   | 11.0913224 |            |   | 7.3255091  |            |
| H | 2.2809313  | 7.2242140  | H | -0.0490305 | 10.2208695 |
|   | 20.0303949 |            |   | 9.0177956  |            |
| H | 0.8749931  | 7.3383049  | H | 3.3316486  | 11.2669066 |
|   | 18.9195717 |            |   | 7.5845982  |            |
| H | 2.5010901  | 6.9448579  | H | 4.0006394  | 9.6221212  |
|   | 18.2721214 |            |   | 7.5217177  |            |
| H | 4.6774198  | 8.4079382  | H | 2.5618179  | 10.0241936 |
|   | 9.1609526  |            |   | 6.5714489  |            |

H 4.4658110 7.9320569  
18.6605651  
H 5.9370223 8.5401043  
17.8871888  
H 4.7277192 9.6845016  
18.5189502  
H 3.9681071 7.2909369  
14.9603774  
H 5.3949182 7.0107975  
15.9818071  
H 3.7773153 6.5714231  
16.5733413  
H 4.7805151 9.7062115  
14.6972851  
H 4.9896040 10.7276270  
16.1391934  
H 6.1270025 9.3959944  
15.8043645  
H -1.1217696 8.9564620  
19.2133854  
H -1.1345324 10.1139473  
20.5606883  
H 0.3118316 9.1353917  
20.2604406  
H -0.8967737 12.5681095  
17.8943224  
H -1.6671471 12.0495617  
19.4017084  
H -1.9472110 11.1273033  
17.9091825  
H 1.3519425 12.5299852  
19.0231891  
H 1.8853788 11.1060450  
19.9682384  
H 0.5173030 12.0982105  
20.5381912  
H -7.1199494 8.8066012  
13.4492452  
H -8.8304046 8.3121274  
13.4554005  
H -7.7205537 7.6680852  
12.2231268  
H -7.3714571 6.4702699  
16.4006892

H -8.7027955 7.5299768  
15.8665923  
H -7.0480994 8.1536983  
15.9250300  
H -2.0608530 3.1957826  
14.7029688  
H -1.9525970 2.0258061  
13.3753659  
H -1.5478534 3.7267689  
13.0752696  
H -5.6109641 2.3037797  
13.7220073  
H -4.1919102 1.2240575  
13.7555838  
H -4.4595872 2.3825087  
15.0815338  
H -4.8553662 2.9786703  
11.3794732  
H -3.2981259 3.8223152  
11.1418324  
H -3.3339564 2.0732878  
11.4615711  
H -3.4997123 10.4085298  
19.7826866  
H -4.9812371 10.7294028  
20.7013972  
H -5.0945617 10.2704681  
18.9921623  
H -3.9786598 7.4860568  
22.1467556  
H -4.3633324 9.1975057  
22.4670013  
H -2.8477499 8.7685894  
21.6361779  
H -6.2998096 7.3617897  
21.1008668  
H -6.6598343 8.2609161  
19.6004094  
H -6.6077359 9.1062167  
21.1649747  
H -4.4833084 2.9924697  
18.3185693  
H -3.0301442 1.9657951  
18.2560435

H -3.2713752 3.2514449  
17.0486119  
H -2.2972602 4.2474409  
21.1748640  
H -2.2440429 2.5605883  
20.6093798  
H -3.8013732 3.3727998  
20.8155316  
H -0.5423350 4.5977864  
19.2701752  
H -0.9105468 4.0306497  
17.6215832  
H -0.7635088 2.8610041  
18.9396405  
H -5.3323017 8.1998650  
14.9163863  
H -2.2282179 5.3323124  
14.2676259  
H -2.2178072 5.3237060  
16.7876011  
H -3.5375983 9.2304093  
17.9487651  
H -0.5168270 11.3590865  
16.2229461  
H 2.8135524 9.3867122  
14.4095848  
H 0.5790650 9.9032601  
10.8562025  
H 3.2316332 11.8554485  
13.5839725  
H 1.7365795 5.4098322  
15.8880702  
H 3.3055542 7.5306827  
12.1592215  
H 2.7665119 6.0931428  
11.1661597  
H -0.3471380 6.4391220  
16.7751582  
H -3.5485796 11.2924856  
10.7801297  
H -4.5598500 6.9078158  
11.5958300  
H -3.7324992 6.4770317  
10.0185257

H 1.1841091 15.8848141  
13.1896061  
H 3.4611687 18.2240733  
6.7081725  
H 1.2806334 17.7235389  
7.7070833  
H 2.2548831 18.3225797  
14.0525005  
H 2.1766150 19.5887076  
11.8527588  
H -0.5488483 15.9650039  
13.6343768  
H -1.1719043 14.9300300  
11.4389012  
H 3.6038952 16.9102865  
15.5802582  
H -0.1630683 17.5352619  
8.9346274  
H -1.4836770 17.0566103  
11.2067406  
H -1.5619627 13.7277072  
9.8655239  
H 5.3451377 16.5928316  
6.8838145  
H -2.8126475 12.1583742  
8.4612811  
H 0.8968172 14.8024493  
6.4782385  
H -2.2518083 11.8927890  
6.0427149  
H -1.4575309 16.3412388  
9.1369293  
H -0.3854572 13.2358286  
5.0643394  
H 5.6362873 15.7366611  
14.7277004  
H 4.8831326 17.3091047  
10.7809020  
H 4.9819810 14.4278634  
8.0804701  
H 2.7945351 13.9205371  
9.0943272  
H 6.2716570 15.9375410  
12.3261857

H 1.8326836 15.1465835  
 10.9157805  
 H 0.7893168 13.7455372  
 10.6166051  
 H 3.1690958 19.0024585  
 10.4700118  
 H -1.6968751 12.1502840  
 12.2057660  
 H -9.5001408 6.0453527  
 14.3791092  
 H -8.6505961 5.3563998  
 12.9914245  
 H -8.2790518 4.7754712  
 14.6302131  
 H -6.3979269 5.6013227  
 19.7446424

## 5. Int 3a'

C -1.0464947 -0.9027078 -  
 4.3597384  
 C -1.2086125 -0.5076006 -  
 3.0284061  
 C -2.2380694 0.3724980 -  
 2.6980354  
 C -3.0780089 0.9410723 -  
 3.6688118  
 C -2.8103048 0.6004487 -  
 5.0233425  
 C -1.8558275 -0.3953622 -  
 5.3787231  
 P -0.2916553 -1.3897296 -  
 1.7025302  
 Au -1.5769829 -2.1445781  
 0.1472101  
 C -2.6255874 -2.9290852  
 1.8155922  
 C -2.1765493 -4.2317579  
 2.4533782  
 C -2.1421145 -5.4702954  
 1.5392542  
 C -1.0151110 -6.4200755  
 2.0808510

C -0.5921446 -5.7109645  
 3.4077778  
 N -0.8224183 -4.2951664  
 3.0970349  
 C -1.5399723 -7.8365811  
 2.2980567  
 C -2.1997579 -8.4814255  
 1.2364799  
 C -2.6659758 -9.7898625  
 1.3676718  
 C -2.4758525 -10.4864387  
 2.5677844  
 C -1.8127877 -9.8614338  
 3.6258317  
 C -1.3455121 -8.5476375  
 3.4901782  
 C 0.2297315 -6.4475898  
 1.1705523  
 C 1.0806378 -7.5676651  
 1.1651158  
 C 2.2554637 -7.5795049  
 0.4091616  
 C 2.6119029 -6.4654883 -  
 0.3572550  
 C 1.7855176 -5.3417792 -  
 0.3507835  
 C 0.6088777 -5.3346047  
 0.4036291  
 C 0.0296621 -3.3335638  
 3.3794134  
 O 1.0105731 -3.6309566  
 4.2080570  
 C 2.0904588 -2.6723849  
 4.4536345  
 C 3.2996153 -2.9350003  
 3.5908479  
 C 4.4214570 -2.1094867  
 3.7755337  
 C 5.5747318 -2.2997386  
 3.0132687  
 C 5.6254452 -3.3224105  
 2.0577748  
 C 4.5144583 -4.1487271  
 1.8753031



|   |            |            |   |   |            |           |   |
|---|------------|------------|---|---|------------|-----------|---|
| C | 3.3558144  | -3.9590152 |   | O | 1.4608911  | 1.5974695 | - |
|   | 2.6385845  |            |   |   | 6.3166285  |           |   |
| C | -4.2356373 | 1.8428391  | - | C | 2.4561323  | 0.5797095 | - |
|   | 3.1655824  |            |   |   | 6.0447905  |           |   |
| C | -4.7617887 | 1.3100749  | - | O | 2.3136841  | 0.2101014 | - |
|   | 1.8077136  |            |   |   | 4.6534927  |           |   |
| O | -3.5427856 | 1.1617704  | - | P | 0.2220173  | 2.9995575 | - |
|   | 6.0570169  |            |   |   | 0.6508445  |           |   |
| C | -3.1174727 | 2.4770981  | - | C | 1.8643353  | 3.3229272 |   |
|   | 6.4630095  |            |   |   | 0.0920768  |           |   |
| C | -1.7615695 | -1.0090097 | - | C | 2.8057670  | 4.0961025 | - |
|   | 6.7955714  |            |   |   | 0.5909916  |           |   |
| C | -1.3767833 | 0.0254422  | - | C | 3.9949769  | 4.5045016 |   |
|   | 7.8762331  |            |   |   | 0.0205225  |           |   |
| C | 1.2457734  | -0.5600076 | - | C | 4.2415175  | 4.0462425 |   |
|   | 1.0973745  |            |   |   | 1.3510837  |           |   |
| C | 1.9388082  | 0.5168927  | - | C | 3.3585168  | 3.1468946 |   |
|   | 1.7217968  |            |   |   | 2.0180131  |           |   |
| C | 3.2629818  | 0.6848978  | - | C | 2.1502033  | 2.8570288 |   |
|   | 1.3263775  |            |   |   | 1.3702947  |           |   |
| C | 3.8649189  | -0.0887950 | - | C | 4.9495577  | 5.4527181 | - |
|   | 0.3288098  |            |   |   | 0.7480799  |           |   |
| C | 3.1726558  | -1.0730911 |   | C | 6.3879536  | 4.8947838 | - |
|   | 0.3465158  |            |   |   | 0.8524944  |           |   |
| C | 1.8528833  | -1.2959496 | - | O | 5.4503481  | 4.4189190 |   |
|   | 0.0670700  |            |   |   | 1.9082736  |           |   |
| O | 4.1742885  | 1.5701272  | - | C | 5.4761791  | 5.3785841 |   |
|   | 1.8398168  |            |   |   | 2.9838440  |           |   |
| C | 5.3482905  | 1.4518845  | - | C | 3.6320125  | 2.4445170 |   |
|   | 0.9985345  |            |   |   | 3.3714618  |           |   |
| O | 5.1741906  | 0.2752762  | - | C | 2.7338473  | 1.1942375 |   |
|   | 0.1723738  |            |   |   | 3.5328229  |           |   |
| C | 1.3519561  | 1.4324587  | - | C | -0.6467885 | 4.6223997 | - |
|   | 2.7369554  |            |   |   | 0.6538439  |           |   |
| C | 0.5455987  | 2.5677316  | - | C | -0.0546560 | 5.7646264 | - |
|   | 2.4143760  |            |   |   | 1.1910648  |           |   |
| C | 0.0138396  | 3.3768859  | - | C | -0.6713914 | 7.0229246 | - |
|   | 3.4264785  |            |   |   | 1.1345631  |           |   |
| C | 0.2741269  | 3.1433476  | - | C | -1.8761988 | 7.1084127 | - |
|   | 4.7877424  |            |   |   | 0.3887853  |           |   |
| C | 1.0887748  | 2.0694679  | - | C | -2.5690626 | 5.9508257 |   |
|   | 5.0848331  |            |   |   | 0.0585292  |           |   |
| C | 1.6083790  | 1.2413910  | - | C | -1.9164716 | 4.7243054 | - |
|   | 4.0833017  |            |   |   | 0.0797103  |           |   |

C -3.9982824 5.9983244  
0.6433732  
C -4.9406644 6.6556092 -  
0.3912204  
O -2.4311849 8.3413746 -  
0.0890666  
C -1.7503215 9.0245538  
0.9848180  
C 0.0127315 8.1658611 -  
1.9283129  
C 1.3194739 8.5860963 -  
1.2211485  
Au -1.0970041 1.5808151  
0.5943235  
Ag -1.0714809 0.9236064  
3.7942100  
C 0.3963133 -2.8530124 -  
2.5850745  
C 1.6981589 -2.8754522 -  
3.0752728  
C 2.2114539 -3.9850094 -  
3.7684586  
C 1.2970824 -5.0256599 -  
4.0677540  
C 0.0042700 -5.0909342 -  
3.4722815  
C -0.4205085 -3.9782755 -  
2.7424558  
C 3.7297988 -3.9632278 -  
4.0833751  
C 4.4866891 -3.5207377 -  
2.8020004  
O 1.6554512 -6.0527457 -  
4.9265931  
C 1.6228639 -5.6671624 -  
6.3158756  
C -0.8817920 -6.3546210 -  
3.5434064  
C -1.3448615 -6.6535660 -  
4.9862291  
C 4.0220047 -2.9277883 -  
5.1919386  
C 4.3330884 -5.3282603 -  
4.4725757

C -2.1490917 -6.1996350 -  
2.6796824  
C -0.0934667 -7.5604198 -  
2.9801519  
C -4.0561258 6.7795176  
1.9755653  
C -4.5337091 4.5805525  
0.9305050  
C 0.3708467 7.6267414 -  
3.3390968  
C -0.8657200 9.4104135 -  
2.1694472  
Cl -2.7773655 0.5930169  
2.0222339  
C 4.9773021 6.8318727 -  
0.0488416  
C 4.4689799 5.6883154 -  
2.1956700  
C 3.2834128 3.3716666  
4.5591258  
C 5.0888914 1.9374497  
3.4588162  
O -0.0261819 -2.1188708  
2.8930760  
C -3.7155120 3.2763356 -  
2.9266305  
C -5.4590240 1.8785234 -  
4.1077437  
C -0.7097887 -2.1373198 -  
6.8516466  
C -3.1290286 -1.6428418 -  
7.1457838  
O -1.7964493 -2.0852836  
5.3686130  
Cl -0.9922354 -1.2409383  
6.3404237  
O -1.9171693 -0.4272285  
7.2196452  
O -0.0762857 -2.1097123  
7.1730574  
O -0.0819992 -0.2600056  
5.5261924  
H -3.3797719 3.2394834 -  
5.7155411

H -2.0319491 2.5033365 -  
6.6385414  
H -3.6461362 2.6950109 -  
7.3990121  
H -2.3320810 9.9308910  
1.1916689  
H -1.7108427 8.3943160  
1.8865878  
H -0.7250369 9.3059414  
0.7019049  
H 6.2957894 6.0793881  
2.7739457  
H 4.5292428 5.9321430  
3.0509132  
H 5.6827759 4.8763174  
3.9399640  
H 0.6196426 -5.3125956 -  
6.6009162  
H 2.3553157 -4.8764874 -  
6.5366051  
H 1.8736126 -6.5661137 -  
6.8918263  
H -4.9451557 6.0833108 -  
1.3313463  
H -5.9690158 6.6734126  
0.0018877  
H -4.6350658 7.6862044 -  
0.6113003  
H -3.9464504 4.0697045  
1.7079735  
H -5.5693058 4.6615423  
1.2919110  
H -3.3248730 6.3798257  
2.6929365  
H -3.8744438 7.8493665  
1.8302824  
H -5.0588939 6.6672399  
2.4169307  
H -0.5287691 7.2680768 -  
3.8615768  
H 0.8158408 8.4366192 -  
3.9358337  
H 1.0990530 6.8043656 -  
3.3153950

H -1.0412765 10.0002029 -  
1.2639744  
H -0.3499172 10.0625295 -  
2.8908919  
H -1.8411632 9.1361699 -  
2.5943331  
H 1.1278509 9.0050160 -  
0.2228189  
H 1.9957555 7.7276034 -  
1.0953941  
H 1.8453509 9.3479156 -  
1.8165915  
H 3.9584144 7.2206740  
0.0944819  
H 5.5322616 7.5493921 -  
0.6725692  
H 5.4689651 6.7897939  
0.9277736  
H 4.3910853 4.7484127 -  
2.7627185  
H 5.2004395 6.3282574 -  
2.7095025  
H 3.4996342 6.2078184 -  
2.2386343  
H 6.4184789 4.0067729 -  
1.5002427  
H 6.8005879 4.6341159  
0.1279653  
H 7.0364629 5.6553788 -  
1.3140305  
H 3.8794970 4.2883641  
4.5790550  
H 3.4582249 2.8340967  
5.5044247  
H 2.2212210 3.6495369  
4.5201638  
H 5.3072951 1.2553985  
2.6226337  
H 5.2213400 1.3771221  
4.3966624  
H 5.8270571 2.7452500  
3.4348813  
H 2.8368179 0.4968514  
2.6889579

H 1.6726401 1.4595701  
3.6524483  
H 3.0269281 0.6704883  
4.4537136  
H 3.5019987 -3.1747040 -  
6.1294458  
H 5.1022202 -2.8946038 -  
5.4014840  
H 3.7016103 -1.9237779 -  
4.8801786  
H 4.0604375 -6.1082017 -  
3.7477449  
H 5.4293326 -5.2325079 -  
4.4754552  
H 4.0312024 -5.6685027 -  
5.4683674  
H 4.2950534 -4.2132499 -  
1.9689146  
H 4.2149670 -2.5108076 -  
2.4677615  
H 5.5682655 -3.5202603 -  
3.0018077  
H -1.9012391 -6.0034573 -  
1.6256436  
H -2.7191792 -7.1388839 -  
2.7170661  
H -2.8085116 -5.3952917 -  
3.0392195  
H 0.8103982 -7.7575560 -  
3.5692770  
H -0.7284049 -8.4600212 -  
3.0032614  
H 0.2030639 -7.3754344 -  
1.9373927  
H -0.5121923 -6.9664656 -  
5.6246323  
H -1.8251924 -5.7721750 -  
5.4382533  
H -2.0826965 -7.4709308 -  
4.9717762  
H -0.9291676 -2.9482401 -  
6.1411730  
H -0.7093947 -2.5700724 -  
7.8624109

H 0.3093971 -1.7729367 -  
6.6499002  
H -3.9247473 -0.8875274 -  
7.1589117  
H -3.0773949 -2.1124233 -  
8.1404734  
H -3.3949096 -2.4204569 -  
6.4135267  
H -2.1839351 0.7414235 -  
8.0607234  
H -0.4702223 0.5790603 -  
7.5914755  
H -1.1736699 -0.4981040 -  
8.8232071  
H -3.3235534 3.7398377 -  
3.8412256  
H -4.5294271 3.9131307 -  
2.5469361  
H -2.9088265 3.2805994 -  
2.1804954  
H -5.7851564 0.8628306 -  
4.3741259  
H -6.2879791 2.3775688 -  
3.5836241  
H -5.2762158 2.4285974 -  
5.0358698  
H -5.0516918 0.2512683 -  
1.8765431  
H -4.0338543 1.4148244 -  
0.9905931  
H -5.6484412 1.8915501 -  
1.5159189  
H -4.5469190 3.9525511  
0.0277158  
H -2.3878001 3.8237835  
0.3109571  
H 0.9116098 5.6837295 -  
1.6852891  
H 2.6108658 4.3752093 -  
1.6239546  
H 1.4090381 2.2340635  
1.8665053  
H -1.4072496 -3.9751176 -  
2.2806731

H 2.3431006 -2.0161940 -  
 2.9002625  
 H -0.2905327 -1.6466424 -  
 4.5938381  
 H -2.4083365 0.5993771 -  
 1.6449886  
 H 3.6343222 -1.6663462  
 1.1321885  
 H 6.2348588 1.3268350 -  
 1.6318923  
 H 5.4124648 2.3341600 -  
 0.3452421  
 H 1.2988482 -2.1120734  
 0.4000476  
 H -0.1419741 3.7834823 -  
 5.5645917  
 H 3.4599282 1.0031905 -  
 6.2104393  
 H 2.2626128 -0.2949590 -  
 6.6767798  
 H -0.6146470 4.2244989 -  
 3.1586242  
 H -3.6248244 -3.1304515  
 1.3948671  
 H -1.6520370 -10.3955595  
 4.5647147  
 H -0.8155031 -8.0931354  
 4.3290767  
 H 4.3915498 -1.3108284  
 4.5200212  
 H 1.7047477 -1.6522768  
 4.3328697  
 H -2.7808648 -2.1616025  
 2.5879492  
 H -2.8528117 -4.4498707  
 3.3006763  
 H 2.3200735 -2.8252028  
 5.5157173  
 H 6.4344276 -1.6435245  
 3.1616062  
 H -1.2543526 -5.9904304  
 4.2409208  
 H 0.8172523 -8.4484533  
 1.7524864

H -2.8403303 -11.5101765  
 2.6734852  
 H 2.8900810 -8.4680934  
 0.4146702  
 H -0.0202417 -4.4411520  
 0.3674763  
 H 3.5226123 -6.4801526 -  
 0.9597005  
 H 0.4469611 -5.8919304  
 3.6948498  
 H 2.0428382 -4.4649161 -  
 0.9454101  
 H 6.5244673 -3.4682213  
 1.4564274  
 H 2.4997591 -4.6150219  
 2.4751818  
 H -3.1789825 -10.2690790  
 0.5311020  
 H -2.3420999 -7.9533074  
 0.2903078  
 H 4.5369320 -4.9457130  
 1.1304165  
 H -3.1186972 -5.9669624  
 1.5587254  
 H -1.9461788 -5.1639027  
 0.5029347  
 H -0.7086509 -2.0747285  
 2.1362755  
 O -0.2689218 2.9837173  
 4.5939198  
 Cl -0.8632411 4.2733657  
 3.9285004  
 O -0.2351616 4.4544046  
 2.5700590  
 O -2.3654540 4.1038823  
 3.8096401  
 O -0.5244340 5.4403869  
 4.8367252

## 6. Int 3b'

C -3.0531596 -0.5475970 -  
 3.6283216

C -2.6523432 0.4034725 -  
2.6809706  
C -2.9390901 1.7442349 -  
2.8992579  
C -3.6649436 2.1778307 -  
4.0228394  
C -4.2283986 1.1706195 -  
4.8441133  
C -3.8519960 -0.2000872 -  
4.7204469  
P -1.7736504 -0.1972922 -  
1.1684530  
C -1.0670008 1.3685287 -  
0.4875009  
C -1.5413211 2.1130597  
0.6276085  
C -1.0382439 3.4057191  
0.7460616  
C -0.0758628 3.9304996 -  
0.1209849  
C 0.4439205 3.1909991 -  
1.1639553  
C -0.0774429 1.9016065 -  
1.3279362  
O 0.2038564 5.2288792  
0.2129230  
C -0.4777901 5.4527157  
1.4712256  
O -1.4082746 4.3589948  
1.6602906  
C -2.5454994 1.6202920  
1.6045354  
C -2.2493706 0.7622807  
2.7072998  
C -3.2717535 0.3130790  
3.5533590  
C -4.6100151 0.7119727  
3.3892618  
C -4.8756585 1.5758105  
2.3451711  
C -3.8666306 2.0117119  
1.4798174  
O -4.4106698 2.7800106  
0.4783722

C -5.7594677 3.0564367  
0.9183779  
O -6.0853997 2.0709701  
1.9322039  
P -0.5037386 0.2662897  
3.0422406  
Au 0.5006103 -1.1918753  
1.5624818  
Cl 1.6452984 -3.0567640  
0.4996623  
Ag 3.4384943 -1.3685679  
0.9204254  
O 4.5139526 -0.5673148  
2.8103725  
Cl 3.9598836 -1.1014600  
4.1821462  
O 5.0738231 -0.9451957  
5.1995083  
C -3.7152016 3.7095104 -  
4.2517007  
C -4.1955217 4.1478859 -  
5.6504573  
O -5.1544222 1.4944917 -  
5.8244524  
C -6.4609958 1.8055992 -  
5.2984852  
C -4.2718589 -1.2804647 -  
5.7431297  
C -3.8843326 -0.8466837 -  
7.1753037  
C -3.1465616 -0.9586357 -  
0.2124561  
C -4.4728124 -0.6475447 -  
0.5285838  
C -5.5413324 -1.3654430  
0.0116503  
C -5.2365226 -2.3769615  
0.9685564  
C -3.9020199 -2.7858142  
1.2360394  
C -2.8813022 -2.0395597  
0.6257587  
C -3.4735103 -3.9996673  
2.1010778

C -4.5208739 -5.1335708  
2.1514753  
O -6.3116939 -3.0186603  
1.5623590  
C -6.6188656 -2.5849521  
2.9016062  
C -6.9680533 -1.1258123 -  
0.5357681  
C -7.4637044 -2.4385631 -  
1.1885604  
Au -0.0640178 -1.5964600 -  
2.0368269  
C 1.2937460 -2.4664598 -  
3.4138695  
C 1.4328673 -1.5219231 -  
4.6189657  
C 1.4220504 -2.1423578 -  
6.0190135  
C 2.1354151 -1.0930364 -  
6.9073808  
C 3.3426475 -0.7864922 -  
5.9883213  
N 2.7141743 -0.7403590 -  
4.6552126  
C 2.5308252 -1.6458732 -  
8.2715153  
C 1.5517081 -2.2573728 -  
9.0733829  
C 1.8694011 -2.7501568 -  
10.3402864  
C 3.1751116 -2.6347919 -  
10.8328169  
C 4.1543298 -2.0211278 -  
10.0475818  
C 3.8339894 -1.5291418 -  
8.7764306  
C 1.3121345 0.2011865 -  
7.1036495  
C 1.9491181 1.3430887 -  
7.6207753  
C 1.2561366 2.5432159 -  
7.7908349  
C -0.0963694 2.6309640 -  
7.4416723

C -0.7483602 1.5000638 -  
6.9471856  
C -0.0509010 0.2972186 -  
6.7888034  
C 3.1106265 0.0641013 -  
3.6950976  
O 2.4962773 0.1952318 -  
2.5470943  
O 4.1742204 0.8087076 -  
3.9225144  
C 4.4903224 1.8911773 -  
2.9895329  
C 3.6462467 3.1213301 -  
3.2311640  
C 3.8583434 4.2354868 -  
2.4031622  
C 3.1110810 5.4017998 -  
2.5774777  
C 2.1384231 5.4716906 -  
3.5823585  
C 1.9276697 4.3684560 -  
4.4128819  
C 2.6802139 3.2004230 -  
4.2425846  
C -2.1879883 -4.6373741  
1.5142129  
C -3.1368934 -3.5258582  
3.5317703  
C -7.9672406 -0.6741757  
0.5516162  
C -6.9734265 -0.0432646 -  
1.6348292  
C 0.4039902 1.8361357  
3.2950179  
C -0.1429349 2.8262545  
4.1131031  
C 0.5863087 3.9631796  
4.4712328  
C 1.8929756 4.1054487  
3.9150104  
C 2.4165813 3.1810052  
2.9642842  
C 1.6588525 2.0254439  
2.7271358

C -0.0367170 4.9714699  
5.4685988  
C -1.5056563 4.6203263  
5.7851625  
O 2.5778256 5.2601758  
4.2471367  
C 3.7077418 5.1872941  
5.1393776  
C 3.7251274 3.3658734  
2.1551469  
C 3.8775216 4.8181192  
1.6490348  
C -0.5052751 -0.5958560  
4.6683251  
C -0.9581796 0.0355739  
5.8259008  
C -0.9107933 -0.5850690  
7.0824038  
C -0.2603899 -1.8451477  
7.1463288  
C 0.0931965 -2.5703016  
5.9764063  
C -0.0314629 -1.9078298  
4.7534517  
C -1.6152268 0.1558194  
8.2479592  
C -1.8949520 -0.7078751  
9.4949229  
O 0.0326924 -2.4243780  
8.3699003  
C 1.1748975 -1.8301333  
9.0215428  
C 0.5633845 -4.0418381  
6.0099160  
C 0.7461562 -4.6043181  
4.5853555  
C -0.0442401 6.4197725  
4.9272144  
C 0.7428468 4.9176209  
6.8030448  
C 3.7202483 2.4715984  
0.8922416  
C 4.9565893 2.9270797  
2.9804931

C -0.5129006 -4.8992446  
6.7154691  
C 1.9178662 -4.1990709  
6.7365044  
C -0.7938185 1.3982865  
8.6547756  
C -3.0062089 0.6307097  
7.7488160  
O 5.0230071 -0.4686249 -  
0.5704087  
Cl 5.7296774 -1.5149961 -  
1.4900195  
O 6.8676395 -0.8063167 -  
2.1896191  
C -2.2668577 4.2553204 -  
4.1167152  
C -4.5924962 4.3760979 -  
3.1685000  
C -5.7926893 -1.5469537 -  
5.6773555  
C -3.5611627 -2.6208402 -  
5.4673956  
O 4.7260042 -2.0399732 -  
2.4996275  
O 6.2411593 -2.6495450 -  
0.6238159  
O 2.7574759 -0.2837605  
4.5718524  
O 3.5934719 -2.5630581  
4.0071296  
H -5.8804683 -2.9530090  
3.6284077  
H -6.6656227 -1.4876453  
2.9592849  
H -7.6015499 -3.0077253  
3.1437726  
H 1.3718688 -2.4379188  
9.9129963  
H 2.0544730 -1.8449933  
8.3597806  
H 0.9752087 -0.7917874  
9.3251079  
H 3.5994592 5.9991004  
5.8722986



|                          |                          |
|--------------------------|--------------------------|
| H 3.7441314 4.2224005    | H 0.8074487 3.8853922    |
| 5.6642014                | 7.1777948                |
| H 4.6426738 5.3434682    | H 0.2225310 5.5248927    |
| 4.5816614                | 7.5597283                |
| H -6.8689031 0.9533857 - | H 1.7599852 5.3091798    |
| 4.7327539                | 6.7023072                |
| H -6.4375231 2.6875690 - | H -2.1284221 4.6005355   |
| 4.6414435                | 4.8780305                |
| H -7.1006563 2.0132657 - | H -1.9154310 5.3888600   |
| 6.1646392                | 6.4560127                |
| H -1.4741682 -4.8308879  | H -1.6063158 3.6543663   |
| 6.1836639                | 6.3028052                |
| H -0.2012782 -5.9552962  | H -0.7261230 6.5132670   |
| 6.7195556                | 4.0693612                |
| H -0.6637459 -4.5773316  | H 0.9541714 6.7519723    |
| 7.7533226                | 4.6238724                |
| H 1.5436465 -4.0824055   | H -0.4152176 7.0961534   |
| 4.0368465                | 5.7126956                |
| H 1.0278392 -5.6648685   | H 5.0958320 3.5170160    |
| 4.6591900                | 3.8909808                |
| H 2.6710669 -3.5254141   | H 5.8646414 3.0355890    |
| 6.3032939                | 2.3663881                |
| H 1.8301496 -4.0026746   | H 4.8621547 1.8695567    |
| 7.8099650                | 3.2632425                |
| H 2.2772310 -5.2329438   | H 3.0052472 5.1064619    |
| 6.6137670                | 1.0416571                |
| H -3.6100467 -0.2213047  | H 4.7711888 4.8860970    |
| 7.4013682                | 1.0105258                |
| H -3.5427593 1.1174322   | H 3.9798804 5.5469854    |
| 8.5764581                | 2.4591579                |
| H -2.9454764 1.3595825   | H 2.8357414 2.6431039    |
| 6.9291935                | 0.2622188                |
| H -0.9922591 -0.9584029  | H 3.7784809 1.4018224    |
| 10.0615578               | 1.1409126                |
| H -2.5571610 -0.1403825  | H 4.6177322 2.6992260    |
| 10.1663448               | 0.3007176                |
| H -2.4023834 -1.6449860  | H -5.6382417 4.0410344 - |
| 9.2271536                | 3.2315824                |
| H 0.1955652 1.1231519    | H -4.5785780 5.4697324 - |
| 9.0472304                | 3.2935090                |
| H -0.6350897 2.0679381   | H -4.2256253 4.1422691 - |
| 7.7966585                | 2.1581283                |
| H -1.3254538 1.9653153   | H -3.6409385 3.6301025 - |
| 9.4342914                | 6.4455439                |

H -4.0116283 5.2279117 -  
5.7547275  
H -5.2646581 3.9809866 -  
5.8187974  
H -1.5946633 3.7664286 -  
4.8374130  
H -1.8413020 4.1091819 -  
3.1147301  
H -2.2645306 5.3363914 -  
4.3206653  
H -2.4646329 -2.5172843 -  
5.4742382  
H -3.8318728 -3.3355613 -  
6.2577555  
H -3.8595840 -3.0639978 -  
4.5054600  
H -4.3622183 0.0991085 -  
7.4553614  
H -4.1956709 -1.6218194 -  
7.8921646  
H -2.7946602 -0.7272070 -  
7.2661777  
H -6.3715102 -0.6896476 -  
6.0376861  
H -6.1088689 -1.7797464 -  
4.6491651  
H -6.0424861 -2.4109751 -  
6.3121905  
H -6.3179206 -0.3032943 -  
2.4792034  
H -7.9956221 0.0596093 -  
2.0263453  
H -6.6649479 0.9424006 -  
1.2541980  
H -7.5179474 -3.2515904 -  
0.4540929  
H -8.4670263 -2.2862852 -  
1.6161277  
H -6.7882804 -2.7453662 -  
2.0024238  
H -8.1944060 -1.4792625  
1.2572774  
H -7.5798894 0.1903517  
1.1104159

H -8.9124160 -0.3742981  
0.0731825  
H -3.9940593 -3.0580225  
4.0336053  
H -2.8126510 -4.3809858  
4.1445538  
H -2.3177576 -2.7931732  
3.5187166  
H -4.8430460 -5.4200488  
1.1397762  
H -4.0605317 -6.0136584  
2.6249800  
H -5.4134656 -4.8750649  
2.7290476  
H -2.3175150 -4.9025180  
0.4544808  
H -1.3046218 -3.9891534  
1.6010739  
H -1.9592022 -5.5570560  
2.0725394  
H -0.1811324 -4.5485633  
3.9967792  
H 0.2911351 -2.4084846  
3.8418005  
H -1.3796859 1.0362506  
5.7590111  
H -1.1639841 2.7121558  
4.4694971  
H 2.0427933 1.2546881  
2.0616179  
H -2.7559650 -1.5860701 -  
3.4832407  
H -2.5807011 2.4844699 -  
2.1862965  
H -4.6655708 0.1476368 -  
1.2433994  
H -1.8414955 -2.3279518  
0.7828616  
H 1.1936332 3.5940733 -  
1.8412343  
H -1.0333197 6.3967040  
1.4235872  
H 0.2660507 5.4366081  
2.2826271

|   |            |            |   |
|---|------------|------------|---|
| H | 0.2637573  | 1.3204259  | - |
|   | 2.1847271  |            |   |
| H | -5.3943651 | 0.3580902  |   |
|   | 4.0573397  |            |   |
| H | -5.8003795 | 4.0616291  |   |
|   | 1.3679925  |            |   |
| H | -6.4492026 | 2.9490463  |   |
|   | 0.0733173  |            |   |
| H | -3.0296129 | -0.3580892 |   |
|   | 4.3756756  |            |   |
| H | 0.8066383  | -3.3969584 | - |
|   | 3.7440145  |            |   |
| H | 5.1752922  | -1.9215904 | - |
|   | 10.4218276 |            |   |
| H | 4.6167663  | -1.0492307 | - |
|   | 8.1862633  |            |   |
| H | 4.6119940  | 4.1902124  | - |
|   | 1.6141061  |            |   |
| H | 4.3937378  | 1.5147661  | - |
|   | 1.9619992  |            |   |
| H | 2.2770092  | -2.7409361 | - |
|   | 3.0046383  |            |   |
| H | 5.5503799  | 2.0878400  | - |
|   | 3.1905950  |            |   |
| H | 3.2823167  | 6.2555728  | - |
|   | 1.9192204  |            |   |
| H | 4.0759940  | -1.6070095 | - |
|   | 6.0113586  |            |   |
| H | 3.0027639  | 1.2964286  | - |
|   | 7.9058678  |            |   |
| H | 3.4252569  | -3.0187367 | - |
|   | 11.8237720 |            |   |
| H | 1.7775187  | 3.4152971  | - |
|   | 8.1904722  |            |   |
| H | -0.5936324 | -0.5676627 | - |
|   | 6.4040961  |            |   |
| H | -0.6362832 | 3.5723831  | - |
|   | 7.5622884  |            |   |
| H | 3.8568263  | 0.1564920  | - |
|   | 6.1987495  |            |   |
| H | -1.8036244 | 1.5468551  | - |
|   | 6.6707225  |            |   |
| H | 1.5469638  | 6.3795160  | - |
|   | 3.7127571  |            |   |

|   |            |            |   |
|---|------------|------------|---|
| H | 2.5066777  | 2.3620525  | - |
|   | 4.9197373  |            |   |
| H | 1.0948059  | -3.2250281 | - |
|   | 10.9459497 |            |   |
| H | 0.5259540  | -2.3439445 | - |
|   | 8.7081587  |            |   |
| H | 1.1743377  | 4.4083644  | - |
|   | 5.2018751  |            |   |
| H | 2.0027141  | -3.0763585 | - |
|   | 6.0315938  |            |   |
| H | 0.3997332  | -2.3863593 | - |
|   | 6.3327032  |            |   |
| H | 1.7678031  | -0.5083081 | - |
|   | 2.4019377  |            |   |
| H | 0.6400554  | -0.7581308 | - |
|   | 4.5944266  |            |   |

## 7. Int 3a' with one molecule of methanol

|   |            |           |   |
|---|------------|-----------|---|
| C | -2.9995719 | 5.0108161 |   |
|   | 0.1427615  |           |   |
| C | -2.7820842 | 4.8243482 | - |
|   | 1.2311215  |           |   |
| C | -2.9653848 | 5.9061295 | - |
|   | 2.1057074  |           |   |
| C | -3.3680987 | 7.1511277 | - |
|   | 1.6160598  |           |   |
| C | -3.5778126 | 7.3345791 | - |
|   | 0.2443469  |           |   |
| C | -3.3879048 | 6.2622161 |   |
|   | 0.6336617  |           |   |
| C | -2.3814791 | 3.4841314 | - |
|   | 1.8022011  |           |   |
| O | -1.7349560 | 2.6363062 | - |
|   | 0.8002226  |           |   |
| C | -0.4839120 | 2.9700162 | - |
|   | 0.4441898  |           |   |
| O | 0.2374614  | 3.6503305 | - |
|   | 1.2479786  |           |   |
| N | -0.1063679 | 2.4898465 |   |
|   | 0.7355812  |           |   |
| C | 1.2847802  | 2.3035813 |   |
|   | 1.2700266  |           |   |

C 1.0202216 2.0303425  
2.7735840  
C -0.5171129 1.8473317  
2.9717314  
C -0.9828135 1.6059250  
1.5212005  
C 2.3634063 3.3411945  
0.9782584  
Au 2.4625404 5.1992174  
1.9874960  
P 2.6459790 7.2400888  
3.2275228  
C 4.3579613 7.6972839  
3.7234343  
C 5.4349062 7.3768949  
2.8994657  
C 6.7684823 7.5399151  
3.3130575  
C 6.9737772 8.0826556  
4.6078016  
C 5.9014041 8.2766356  
5.5242994  
C 4.6045064 8.1148217  
5.0366752  
C -0.8273576 0.6790119  
3.9090335  
C -0.2439203 0.6647009  
5.1877336  
C -0.5228069 -0.3560899  
6.0971134  
C -1.3998434 -1.3900888  
5.7447673  
C -1.9904265 -1.3857032  
4.4788613  
C -1.7076637 -0.3581793  
3.5689387  
C -1.2661334 3.0915933  
3.5014890  
C -2.6590951 2.9927174  
3.6904081  
C -3.4095243 4.0759746  
4.1464558  
C -2.7798987 5.2924571  
4.4388165

C -1.4023986 5.4044089  
4.2591042  
C -0.6560648 4.3163600  
3.7877025  
C 7.8681876 7.0651565  
2.3271819  
C 7.4362083 5.7108625  
1.7063016  
O 8.2524552 8.3725485  
5.0555525  
C 8.7703019 9.6264761  
4.5706097  
C 6.1224551 8.5233839  
7.0346912  
C 6.8732945 9.8392343  
7.3332427  
C 1.6243339 8.5892471  
2.4788224  
C 1.9434022 9.9742999  
2.3679048  
C 0.8713465 10.8084367  
2.0598434  
C -0.4192800 10.3341788  
1.7966063  
C -0.7250540 8.9892413  
1.8501610  
C 0.3278635 8.1301715  
2.1941653  
O 0.8738452 12.1778607  
2.0228028  
C -0.4204486 12.5547517  
1.4948925  
O -1.2662838 11.3792801  
1.5516138  
C 3.2799664 10.5679389  
2.6520697  
C 4.3602021 10.6625822  
1.7205920  
C 5.5961207 11.1893466  
2.1164416  
C 5.8175793 11.7050739  
3.4049043  
C 4.7466043 11.6713883  
4.2743048

C 3.5198914 11.1097183  
 3.9034694  
 O 4.6979886 12.0669206  
 5.5860745  
 C 3.2962117 11.9885983  
 5.9444883  
 O 2.6647375 11.1152379  
 4.9797945  
 P 4.1188847 10.1687275 -  
 0.0426994  
 Au 3.9765463 7.8984390 -  
 0.3822473  
 Cl 4.4943395 5.5869749 -  
 0.9294734  
 Ag 3.0256827 6.4317900 -  
 2.8130073  
 O 1.8965932 4.6473698 -  
 3.9520818  
 Cl 0.5787846 4.9694027 -  
 4.7107894  
 O -0.2948419 3.7274425 -  
 4.6890687  
 C 5.6328906 10.6897084 -  
 0.9564751  
 C 6.3810069 9.7437510 -  
 1.6623700  
 C 7.4753973 10.1045489 -  
 2.4509722  
 C 7.7983078 11.4869000 -  
 2.5184424  
 C 7.1767158 12.4471370 -  
 1.6787246  
 C 6.0468975 12.0213818 -  
 0.9660961  
 C 7.6444533 13.9040135 -  
 1.4269893  
 C 6.6452167 14.8954480 -  
 2.0603509  
 O 8.7696939 11.8749092 -  
 3.4265502  
 C 8.2260180 12.5232949 -  
 4.5964860  
 C 8.3005519 9.0123264 -  
 3.1664844

C 9.7663795 9.0971550 -  
 2.6820032  
 C 2.8016685 11.2858684 -  
 0.6585757  
 C 1.8510334 10.8751515 -  
 1.5889523  
 C 0.9302150 11.7794744 -  
 2.1473990  
 C 1.1050116 13.1568039 -  
 1.8268776  
 C 2.0258037 13.5923621 -  
 0.8297930  
 C 2.8434090 12.6220290 -  
 0.2485146  
 C -0.2058083 11.2100925 -  
 3.0356297  
 C -0.4999095 9.7422114 -  
 2.6470453  
 O 0.3115900 14.1398678 -  
 2.3894879  
 C 0.5505844 14.5086042 -  
 3.7633257  
 C 2.1576136 15.0663414 -  
 0.3769282  
 C 0.8156775 15.6118045  
 0.1626126  
 C 0.2130384 11.1925697 -  
 4.5237664  
 C -1.5377108 11.9681538 -  
 2.8386038  
 C 2.6395204 15.9511248 -  
 1.5496193  
 C 3.1895498 15.2179418  
 0.7599820  
 C 7.6646679 14.1419742  
 0.1072881  
 C 9.0716507 14.2280247 -  
 1.9150376  
 C 8.2457719 9.1578061 -  
 4.7037949  
 C 7.7763227 7.6007650 -  
 2.8326340  
 C 1.8352308 7.0161127  
 4.8678429

|    |            |            |   |            |            |   |
|----|------------|------------|---|------------|------------|---|
| C  | 1.0210508  | 7.9824679  | O | 4.8307197  | 7.9748402  | - |
|    | 5.4477703  |            |   | 4.7757443  |            |   |
| C  | 0.4582964  | 7.8129939  | O | 4.0734877  | 10.1861503 | - |
|    | 6.7254360  |            |   | 3.9001148  |            |   |
| C  | 0.8605730  | 6.6645257  | O | 0.9128341  | 5.3474151  | - |
|    | 7.4496603  |            |   | 6.1395231  |            |   |
| C  | 1.5921384  | 5.6031407  | O | -0.1208663 | 6.1173183  | - |
|    | 6.8413745  |            |   | 4.0082055  |            |   |
| C  | 2.0757283  | 5.8185478  | O | 1.1326222  | 5.8311346  | - |
|    | 5.5497935  |            |   | 0.7921792  |            |   |
| C  | -0.5694479 | 8.8843014  | C | 0.1215499  | 6.8822098  | - |
|    | 7.1725147  |            |   | 0.8305954  |            |   |
| C  | -1.5793114 | 9.0983664  | H | 8.8081641  | 9.6531542  |   |
|    | 6.0129175  |            |   | 3.4717621  |            |   |
| O  | 0.5169230  | 6.5206081  | H | 8.1566354  | 10.4675752 |   |
|    | 8.7846545  |            |   | 4.9274805  |            |   |
| C  | 1.3383038  | 7.3116956  | H | 9.7864856  | 9.7171182  |   |
|    | 9.6684606  |            |   | 4.9727212  |            |   |
| C  | 1.7786249  | 4.2269071  | H | 9.0745640  | 12.7158244 | - |
|    | 7.5155620  |            |   | 5.2638922  |            |   |
| C  | 2.5947561  | 4.3126832  | H | 7.4958190  | 11.8716611 | - |
|    | 8.8244057  |            |   | 5.1000931  |            |   |
| C  | 0.1570029  | 10.2214449 | H | 7.7375982  | 13.4759014 | - |
|    | 7.4380107  |            |   | 4.3428024  |            |   |
| C  | -1.4246216 | 8.5092855  | H | 0.4227720  | 15.5975302 | - |
|    | 8.4004927  |            |   | 3.8293262  |            |   |
| C  | 2.5216938  | 3.2452271  | H | 1.5687467  | 14.2390234 | - |
|    | 6.5891923  |            |   | 4.0772348  |            |   |
| C  | 0.3804103  | 3.6312940  | H | -0.1819535 | 14.0302295 | - |
|    | 7.8044703  |            |   | 4.4294860  |            |   |
| O  | 2.4605331  | 8.2773189  | H | 2.3947982  | 7.0107040  |   |
|    | 4.0472528  |            |   | 9.5959737  |            |   |
| Cl | 3.6903864  | 8.9816172  | H | 1.2598491  | 8.3861084  |   |
|    | 4.7198179  |            |   | 9.4431525  |            |   |
| O  | 3.2755608  | 9.3936458  | H | 0.9700848  | 7.1239971  |   |
|    | 6.1180611  |            |   | 10.6841237 |            |   |
| C  | 8.0028079  | 8.0937202  | H | 9.8249666  | 8.9507479  | - |
|    | 1.1846405  |            |   | 1.5922856  |            |   |
| C  | 9.2528118  | 6.8106889  | H | 10.3635573 | 8.3078876  | - |
|    | 2.9596793  |            |   | 3.1644283  |            |   |
| C  | 4.7820584  | 8.5781681  | H | 10.2120755 | 10.0692950 | - |
|    | 7.7969663  |            |   | 2.9280836  |            |   |
| C  | 6.9239238  | 7.3283175  | H | 6.7522659  | 7.4473187  | - |
|    | 7.6044311  |            |   | 3.2038172  |            |   |

H 8.4244189 6.8602548 -  
3.3237619  
H 7.2034975 9.1983536 -  
5.0516761  
H 8.7792416 10.0491924 -  
5.0500689  
H 8.7238692 8.2806519 -  
5.1672611  
H 8.3350831 13.4256316  
0.6057061  
H 8.0317379 15.1579954  
0.3142329  
H 6.6719610 14.0568493  
0.5707753  
H 9.1570477 14.2800065 -  
3.0054075  
H 9.3553617 15.2136376 -  
1.5162920  
H 9.7982038 13.4895734 -  
1.5486242  
H 6.6052469 14.7925275 -  
3.1543460  
H 5.6285784 14.7336842 -  
1.6737407  
H 6.9367321 15.9304394 -  
1.8245725  
H 3.5312801 15.5221901 -  
2.0291917  
H 2.9036668 16.9502821 -  
1.1706586  
H 1.8655852 16.0794218 -  
2.3127557  
H 2.9272986 14.6125705  
1.6408037  
H 3.2150260 16.2707498  
1.0750549  
H 4.2082527 14.9500797  
0.4394357  
H 0.5343350 15.1049934  
1.0969432  
H 0.0062976 15.4921977 -  
0.5664210  
H 0.9238724 16.6830152  
0.3925433

H 0.4521182 12.1882374 -  
4.9125251  
H -0.6074827 10.7787461 -  
5.1310310  
H 1.0936838 10.5519552 -  
4.6629801  
H -1.8210265 11.9811060 -  
1.7744009  
H -2.3302757 11.4399296 -  
3.3897746  
H -1.5132960 13.0033387 -  
3.1890509  
H -0.7129488 9.6465696 -  
1.5714812  
H 0.3203504 9.0661235 -  
2.9198472  
H -1.3872907 9.3989238 -  
3.1982857  
H 0.8971414 10.1256039  
8.2465517  
H -0.5700836 10.9937021  
7.7316312  
H 0.6805932 10.5696766  
6.5365222  
H -1.8819366 7.5170960  
8.2844596  
H -2.2334231 9.2499849  
8.4934406  
H -0.8636839 8.5202149  
9.3408095  
H -2.1197463 8.1660230  
5.7904718  
H -1.1053358 9.4455491  
5.0853677  
H -2.3177833 9.8569859  
6.3102912  
H 2.0002464 3.1057806  
5.6310184  
H 2.5797410 2.2642031  
7.0819600  
H 3.5507698 3.5716895  
6.3754362  
H -0.1781640 4.2567082  
8.5117686

H 0.4840295 2.6236052  
8.2370066  
H -0.2031537 3.5486893  
6.8749550  
H 2.0402680 4.8219941  
9.6186610  
H 3.5481978 4.8391012  
8.6630030  
H 2.8273609 3.2954619  
9.1749782  
H 4.1964582 7.6546928  
7.6782160  
H 4.9884682 8.7070907  
8.8691004  
H 4.1546134 9.4246718  
7.4784527  
H 7.9101871 7.2504000  
7.1302835  
H 7.0674238 7.4588647  
8.6883732  
H 6.3804528 6.3843913  
7.4433343  
H 7.9172074 9.7928846  
7.0078657  
H 6.3831737 10.6942319  
6.8455609  
H 6.8691464 10.0210462  
8.4192769  
H 8.3271956 9.0787626  
1.5490381  
H 8.7429124 7.7468983  
0.4477117  
H 7.0440349 8.2314311  
0.6640953  
H 9.1787307 6.1574557  
3.8402406  
H 9.8831834 6.3056405  
2.2118783  
H 9.7715491 7.7272354  
3.2572531  
H 7.2466711 4.9608762  
2.4885295  
H 6.5396509 5.7878300  
1.0782469

H 8.2460899 5.3384609  
1.0615701  
H 7.7939597 7.3922055 -  
1.7532161  
H 6.0730603 8.6998754 -  
1.6312067  
H 5.4931689 12.7565154 -  
0.3851020  
H 3.5246977 12.9064356  
0.5496277  
H 1.8231575 9.8275241 -  
1.8851898  
H 2.6662874 5.0468348  
5.0556608  
H 0.8061129 8.8938522  
4.8915128  
H 3.7599829 8.2812522  
5.6993993  
H 5.2305147 6.9549986  
1.9146282  
H -1.7276886 8.6153672  
1.6463576  
H -0.8522165 13.3421277  
2.1236376  
H -0.3078364 12.8638395  
0.4438833  
H 0.1134421 7.0626181  
2.2868813  
H 6.7817652 12.1211045  
3.6941478  
H 2.8490459 12.9937951  
5.8758188  
H 3.2004584 11.5571868  
6.9471437  
H 6.4141927 11.2263602  
1.3985880  
H 3.3027376 2.8667382  
1.3151252  
H -2.6788383 -2.1832588  
4.1917594  
H -2.1920672 -0.3781789  
2.5911463  
H -2.7662134 5.7789367 -  
3.1718855



|   |            |            |   |
|---|------------|------------|---|
| H | -1.7203707 | 3.6003917  | - |
|   | 2.6718032  |            |   |
| H | 2.4911152  | 3.4752177  | - |
|   | 0.1044216  |            |   |
| H | -3.2600088 | 2.8934395  | - |
|   | 2.0932168  |            |   |
| H | -3.5020343 | 7.9860833  | - |
|   | 2.3063901  |            |   |
| H | -0.7909493 | 0.5663750  |   |
|   | 1.2081670  |            |   |
| H | -3.1660689 | 2.0461038  |   |
|   | 3.4875322  |            |   |
| H | -1.6215141 | -2.1899108 |   |
|   | 6.4539655  |            |   |
| H | -4.4878743 | 3.9683967  |   |
|   | 4.2810406  |            |   |
| H | 0.4163997  | 4.4523112  |   |
|   | 3.6434843  |            |   |
| H | -3.3630123 | 6.1400108  |   |
|   | 4.8054027  |            |   |
| H | -2.0358109 | 1.8392920  |   |
|   | 1.3466755  |            |   |
| H | -0.8898875 | 6.3388386  |   |
|   | 4.4928599  |            |   |
| H | -3.8861460 | 8.3101417  |   |
|   | 0.1371337  |            |   |
| H | -2.8635297 | 4.1828064  |   |
|   | 0.8406718  |            |   |
| H | -0.0567915 | -0.3444971 |   |
|   | 7.0849097  |            |   |
| H | 0.4311872  | 1.4710207  |   |
|   | 5.4788523  |            |   |
| H | -3.5435030 | 6.3914363  |   |
|   | 1.7068599  |            |   |
| H | 1.5449291  | 1.1158869  |   |
|   | 3.0759930  |            |   |
| H | 1.4269630  | 2.8489570  |   |
|   | 3.3801585  |            |   |
| H | 1.5878636  | 5.7904338  |   |
|   | 0.1088135  |            |   |
| H | -0.6955643 | 6.6585119  | - |
|   | 0.1349021  |            |   |
| H | -0.2461808 | 6.9044801  | - |
|   | 1.8579681  |            |   |

|   |           |           |   |
|---|-----------|-----------|---|
| H | 0.6045434 | 7.8285460 | - |
|   | 0.5682725 |           |   |
| H | 0.6845697 | 4.6898366 | - |
|   | 0.9824924 |           |   |
| H | 1.6101929 | 1.3537909 |   |
|   | 0.8050414 |           |   |

#### 8. Int 3b' with one molecule of methanol

|   |              |              |  |
|---|--------------|--------------|--|
| C | -3.432519500 |              |  |
|   | 3.997729400  | -1.005928400 |  |
| C | -2.779509900 |              |  |
|   | 3.754337000  | -2.217726500 |  |
| C | -2.772653300 |              |  |
|   | 4.750337100  | -3.192465400 |  |
| C | -3.359990100 |              |  |
|   | 6.005437000  | -2.981023900 |  |
| C | -3.842863800 |              |  |
|   | 6.269788800  | -1.673885600 |  |
| C | -3.979736400 |              |  |
|   | 5.245436600  | -0.699189600 |  |
| P | -1.933190800 |              |  |
|   | 2.142311200  | -2.497992200 |  |
| C | -0.270273600 |              |  |
|   | 2.579558800  | -3.130904700 |  |
| C | 0.864851300  |              |  |
|   | 2.502129900  | -2.329449100 |  |
| C | 2.118468600  |              |  |
|   | 2.948471700  | -2.782092800 |  |
| C | 2.144977400  |              |  |
|   | 3.618627100  | -4.038496000 |  |
| C | 1.015568300  |              |  |
|   | 3.642689800  | -4.908353300 |  |
| C | -0.173154300 |              |  |
|   | 3.089467100  | -4.429544500 |  |
| C | 3.363042900  |              |  |
|   | 2.642042400  | -1.909180600 |  |
| C | 3.655337300  |              |  |
|   | 3.795652500  | -0.921559800 |  |
| O | 3.302537500  |              |  |
|   | 4.192332800  | -4.531565300 |  |
| C | 3.757381600  |              |  |
|   | 5.421011200  | -3.926426800 |  |

C 1.059348300  
4.239687900 -6.335402000  
C 1.375742300  
5.752205100 -6.288084800  
C -3.454566300  
6.939038900 -4.214695100  
C -4.033514400  
6.111807100 -5.393929500  
O -4.211723900  
7.554845000 -1.311308700  
C -3.077773700  
8.410319800 -1.051268700  
C -4.729582900  
5.451795500 0.635111900  
C -4.039814200  
6.501337300 1.535321100  
C -2.782632600  
1.329870000 -3.920478700  
C -2.280936300  
0.099364100 -4.445795400  
C -2.926544900 -  
0.380736800 -5.571884800  
C -4.030359500  
0.255999200 -6.150803400  
C -4.553319300  
1.419653900 -5.623614900  
C -3.901624200  
1.946443800 -4.494429200  
O -2.663815300 -  
1.552575600 -6.238823200  
C -3.461301800 -  
1.479304900 -7.442991800  
O -4.489068100 -  
0.484461400 -7.209808600  
C -1.116711500 -  
0.645601200 -3.890989100  
C -1.184987800 -  
1.601137700 -2.837586700  
C -0.016851100 -  
2.217616300 -2.359704300  
C 1.250029500 -  
1.982214700 -2.913795400  
C 1.295802800 -  
1.099195800 -3.974586200

C 0.145743200 -  
0.458585500 -4.449164000  
O 0.460421700  
0.304857800 -5.541403300  
C 1.906250200  
0.295419700 -5.621850600  
O 2.380557400 -  
0.742285200 -4.726321200  
P -2.704659200 -  
2.378851600 -2.116043300  
C -2.650200400 -  
4.058654100 -2.876556400  
C -1.967008100 -  
4.314207400 -4.060161700  
C -2.034144700 -  
5.560909200 -4.705425300  
C -2.944890000 -  
6.503906800 -4.169558700  
C -3.543247300 -  
6.330259600 -2.887940900  
C -3.376068800 -  
5.089186500 -2.266652100  
C -1.065902600 -  
5.770847200 -5.897753100  
C -1.482120100 -  
4.870629100 -7.081497200  
O -3.258599600 -  
7.654835000 -4.874983400  
C -4.149236600 -  
7.423284500 -5.985341100  
C -4.322555400 -  
7.455928400 -2.174690900  
C -4.667165100 -  
7.066766600 -0.723167300  
Au -2.435468300 -  
2.639647100 0.223718400  
C -1.845297500 -  
3.187016400 2.191596900  
C -0.694987900 -  
4.159584100 1.979760100  
N 0.251237600 -  
4.436272000 3.128243100  
C 0.516432800 -  
5.882224000 3.272603800

C 0.064694100 -  
6.478651800 1.915669300  
C -1.153223000 -  
5.577303900 1.633998400  
C 0.986656200 -  
3.513429100 3.722266500  
O 0.909759600 -  
2.238782300 3.519771800  
Ag -0.452983500  
1.470747300 1.900812200  
Cl -2.751810400  
0.391080600 1.769417000  
Au -2.110646500  
1.027745300 -0.491390700  
C -0.306550900 -  
7.956160900 2.023863000  
C -1.158540100 -  
8.527835600 1.066055700  
C -1.496032700 -  
9.881352400 1.118879500  
C -0.978709700 -  
10.694581100 2.133601000  
C -0.120719000 -  
10.140132200 3.087274000  
C 0.212957300 -  
8.782035000 3.032506900  
C 1.164230000 -  
6.331630700 0.842195400  
C 2.446095100 -  
6.850987300 1.088312700  
C 3.453949400 -  
6.776240700 0.124861200  
C 3.202848900 -  
6.173360900 -1.112771200  
C 1.930134800 -  
5.663467200 -1.376824000  
C 0.921236600 -  
5.746345100 -0.410539300  
C -4.308515800 -  
1.723443600 -2.732148500  
C -4.979349400 -  
0.744764900 -1.999538900  
C -6.289096100 -  
0.343376600 -2.309005000

C -6.898500000 -  
0.965486100 -3.432763500  
C -6.290889700 -  
2.058390600 -4.114781100  
C -4.979844600 -  
2.386708900 -3.764549300  
C -6.954689500  
0.696495100 -1.370597100  
C -6.521407600  
2.120653700 -1.781181900  
O -8.164168300 -  
0.591023800 -3.855148300  
C -8.201459800  
0.589010400 -4.680849700  
C -7.056040300 -  
2.956409200 -5.115285900  
C -6.174489400 -  
4.121349200 -5.610191100  
O 1.857713400 -  
3.944387500 4.629160900  
C 3.023447700 -  
3.067751500 4.880862800  
C 3.833580500 -  
2.840725900 3.627619600  
C 4.415852400 -  
1.585482300 3.406666700  
C 5.152022300 -  
1.340818600 2.244167500  
C 5.305097800 -  
2.345832500 1.284201800  
C 4.728383400 -  
3.602237500 1.500240800  
C 4.005619700 -  
3.852399700 2.669697800  
C -8.265625600 -  
3.583037000 -4.380078500  
C -7.545707900 -  
2.191941600 -6.364681000  
C -8.495432600  
0.607645600 -1.323553700  
C -6.473401400  
0.468069000 0.085831400  
C -0.921799200 -  
7.226826900 -6.385646800

|             |              |   |             |              |
|-------------|--------------|---|-------------|--------------|
| C           | 0.351512000  | - | O           | 2.438458600  |
| 5.344671700 | -5.429066400 |   | 0.409059800 | 5.305071800  |
| C           | -3.458050800 | - | H           | -7.981668100 |
| 8.736494200 | -2.119404000 |   | 1.498151800 | -4.102429500 |
| C           | -5.654851800 | - | H           | -7.486242500 |
| 7.760073900 | -2.895115600 |   | 0.510045100 | -5.513367800 |
| O           | 0.391813800  | - | H           | -9.221402900 |
| 1.178194800 | 1.342808800  |   | 0.653377700 | -5.078706400 |
| C           | 1.612618100  | - | H           | -3.485852900 |
| 1.347679300 | 0.569459300  |   | 9.365981500 | -0.700916400 |
| C           | 4.606995800  |   | H           | -2.429773500 |
| 2.314523800 | -2.765517700 |   | 7.973917200 | -0.275446400 |
| C           | 3.102711100  |   | H           | -2.479727900 |
| 1.383072200 | -1.049030200 |   | 8.578847500 | -1.959633800 |
| C           | -0.296033200 |   | H           | 4.121859500  |
| 4.082754800 | -7.055254300 |   | 6.064320400 | -4.738739700 |
| C           | 2.115685600  |   | H           | 2.939851400  |
| 3.518622000 | -7.203423400 |   | 5.929347200 | -3.395796100 |
| C           | -4.397656500 |   | H           | 4.587553400  |
| 8.148615500 | -4.054178500 |   | 5.228422400 | -3.232102700 |
| C           | -2.046052800 |   | H           | -5.123580900 |
| 7.433963100 | -4.607866100 |   | 7.049662500 | -5.634025600 |
| C           | -4.800472500 |   | H           | -3.731082300 |
| 4.142170400 | 1.445855300  |   | 6.699627800 | -6.700943300 |
| C           | -6.178820800 |   | H           | -4.283179400 |
| 5.896976300 | 0.330711300  |   | 8.392240400 | -6.480800800 |
| O           | -1.158258700 |   | H           | -6.702493000 |
| 4.488595000 | 1.874600300  |   | 5.136998000 | -0.269133400 |
| Cl          | 0.086960500  |   | H           | -6.732863700 |
| 4.576554300 | 1.005123900  |   | 6.026761800 | 1.273415400  |
| O           | -0.268390400 |   | H           | -6.197180600 |
| 4.894443800 | -0.423857900 |   | 6.847555800 | -0.217108100 |
| O           | 1.047898400  |   | H           | -3.801991200 |
| 5.610208200 | 1.559745700  |   | 3.792672000 | 1.747300500  |
| O           | 0.810025700  |   | H           | -5.383478800 |
| 3.185334600 | 1.054066600  |   | 4.323802000 | 2.360807600  |
| O           | 0.380803500  |   | H           | -2.976954800 |
| 1.196601100 | 4.145881500  |   | 6.255443100 | 1.670307100  |
| Cl          | 1.927623600  |   | H           | -4.129458600 |
| 1.341551400 | 4.218063500  |   | 7.512584500 | 1.125128000  |
| O           | 2.273418600  |   | H           | -4.520475500 |
| 2.775139000 | 4.566022000  |   | 6.498135900 | 2.526035400  |
| O           | 2.506413900  |   | H           | -5.026014800 |
| 0.967107400 | 2.868097000  |   | 5.710099300 | -5.139133300 |

H -4.140494300  
6.758947400 -6.277120700  
H -3.391744800  
5.268884600 -5.684449200  
H -4.009472600  
8.914980100 -3.375328900  
H -4.524885900  
8.618258100 -5.041613900  
H -5.388109100  
7.839919400 -3.692797200  
H -1.596168900  
8.050810700 -3.816603400  
H -1.367887100  
6.589764000 -4.796629300  
H -2.099297900  
8.039502800 -5.525465300  
H 0.719508000  
6.273455000 -5.576000700  
H 1.212951400  
6.192580400 -7.283951800  
H 2.414748700  
5.944181600 -6.004795400  
H -0.603651100  
3.029358600 -7.137558400  
H -0.202421000  
4.482651000 -8.074888100  
H -1.100419500  
4.645851900 -6.556811000  
H 1.825064600  
2.473229200 -7.384070700  
H 3.106692100  
3.539014300 -6.735067400  
H 2.183822800  
4.013791400 -8.184531400  
H 3.834535600  
4.752545300 -1.423791900  
H 4.550606600  
3.550234400 -0.328760400  
H 2.813094800  
3.922034000 -0.228756800  
H 4.386564600  
1.501087200 -3.474039800  
H 5.413612600  
1.971090900 -2.100449300

H 4.981638600  
3.166061400 -3.340188200  
H 2.790194600  
0.533706600 -1.675569000  
H 2.350231300  
1.559580600 -0.269512400  
H 4.031915400  
1.100524000 -0.532618900  
H -2.486257500 -  
5.127580100 -7.450753000  
H -0.773241200 -  
4.993229300 -7.914992400  
H -1.488683000 -  
3.810354000 -6.791683600  
H -0.710637200 -  
7.911643000 -5.553322300  
H -0.074524400 -  
7.270565300 -7.087244500  
H -1.804413700 -  
7.595912900 -6.918691400  
H 0.679327000 -  
5.960064200 -4.577504700  
H 0.404526900 -  
4.290242900 -5.126676700  
H 1.066952400 -  
5.489931900 -6.252003800  
H -3.770683700 -  
6.816645100 -0.135133900  
H -5.155385900 -  
7.920563400 -0.232310900  
H -5.361129300 -  
6.214477500 -0.672150100  
H -3.261661400 -  
9.131181900 -3.122532800  
H -3.976447900 -  
9.510046600 -1.532392300  
H -2.490030200 -  
8.533340400 -1.637918900  
H -5.490541400 -  
8.207820900 -3.881381900  
H -6.254326600 -  
6.844984600 -3.017821200  
H -6.242911500 -  
8.472773900 -2.296776800

H -5.816021000 -  
4.751962000 -4.782654500  
H -6.770575900 -  
4.758354000 -6.279069700  
H -5.298373800 -  
3.775302000 -6.179741900  
H -8.957592500 -  
2.809783200 -4.025032100  
H -8.810790200 -  
4.252152300 -5.063923900  
H -7.928627800 -  
4.177914700 -3.517201100  
H -8.360259600 -  
1.501443600 -6.125225700  
H -6.725936600 -  
1.625954800 -6.830029700  
H -7.926318700 -  
2.912607300 -7.104920700  
H -6.831511400  
2.376692000 -2.802835600  
H -6.967559200  
2.859549100 -1.097993500  
H -5.429341900  
2.228676200 -1.728212400  
H -8.828065800 -  
0.422791900 -1.131958700  
H -8.855025000  
1.240908900 -0.498527700  
H -8.979064200  
0.954035800 -2.241714500  
H -6.658001500 -  
0.566848000 0.410209100  
H -5.407064200  
0.688432600 0.231643200  
H -7.029162800  
1.141730500 0.754204200  
H -5.300350800  
3.334872200 0.891127400  
H -3.471716000  
3.204165300 -0.261356500  
H -2.303608600  
4.553380200 -4.154529200  
H -1.043385200  
3.042960100 -5.080298100

H 0.772513000  
2.079866800 -1.330138200  
H -3.844119700 -  
4.897276800 -1.300717100  
H -1.359775800 -  
3.524596200 -4.500046000  
H -4.474127400 -  
3.198459400 -4.278476500  
H -4.475531800 -  
0.306381000 -1.137984200  
H 2.144079600 -  
2.484847300 -2.545215200  
H 2.209833300  
0.055775600 -6.647695100  
H 2.292769100  
1.266864900 -5.278327400  
H -0.102345600 -  
2.951735200 -1.554549100  
H -5.420833500  
1.912129700 -6.061104900  
H -2.826923100 -  
1.152405500 -8.282847600  
H -3.931851400 -  
2.451439400 -7.629624100  
H -4.278229100  
2.873612500 -4.065672800  
H -2.663964300 -  
3.666313700 2.748476200  
H 0.292471800 -  
10.764090600 3.882490700  
H 0.888296400 -  
8.376792900 3.788617200  
H 4.257246100 -  
0.786674600 4.131557700  
H 2.675457400 -  
2.116053900 5.301614500  
H -1.561915000 -  
2.278511400 2.739169800  
H -0.027475800 -  
3.805214400 1.177462500  
H 3.574351400 -  
3.631557900 5.643550200  
H 5.583700600 -  
0.351907800 2.078154300

H -0.102940000 -  
 6.280879600 4.089272900  
 H 2.661012000 -  
 7.342202100 2.040340900  
 H -1.241089400 -  
 11.753303900 2.177765700  
 H 4.440619100 -  
 7.189477400 0.343425400  
 H -0.066227900 -  
 5.353933100 -0.660332600  
 H 3.990595300 -  
 6.108812800 -1.865607500  
 H 1.569453500 -  
 6.051075700 3.520226000  
 H 1.713115700 -  
 5.203088900 -2.343296200  
 H 5.862828600 -  
 2.149329000 0.366318600  
 H 3.563365200 -  
 4.838829300 2.824605500  
 H -2.165808900 -  
 10.302622800 0.366276200  
 H -1.560624200 -  
 7.908119800 0.262671700  
 H 4.834513100 -  
 4.391893700 0.754175700  
 H -1.977684000 -  
 5.866753000 2.303336800  
 H -1.535709300 -  
 5.625534400 0.608593000  
 H -0.398889800 -  
 1.512750200 0.841975600  
 H 1.829513500 -  
 2.415929600 0.409213900  
 H 2.411391600 -  
 0.890857600 1.162390700  
 H 1.511706200 -  
 0.834088700 -0.390779200  
 H 0.565217600 -  
 1.862983900 2.581879600

C -4.4073404 21.0371213  
 8.7946337  
 C -5.2556760 19.9499755  
 9.4889873  
 C -6.6200548 20.6235001  
 9.8081485  
 C -6.1274090 22.0170935  
 10.2441975  
 N -5.0029886 22.2832844  
 9.3472751  
 C -7.5089447 20.6689786  
 8.5508481  
 C -7.9929416 19.4579657  
 8.0259510  
 C -8.7841969 19.4332903  
 6.8764974  
 C -9.1112782 20.6277453  
 6.2224060  
 C -8.6409897 21.8384904  
 6.7361510  
 C -7.8489131 21.8581402  
 7.8905436  
 C -7.4097744 19.9545614  
 10.9327539  
 C -8.5072419 20.6331791  
 11.4934723  
 C -9.2668184 20.0543574  
 12.5120264  
 C -8.9508577 18.7741705  
 12.9841404  
 C -7.8706342 18.0850921  
 12.4269944  
 C -7.1061607 18.6719405  
 11.4103544  
 C -4.5487648 23.5443483  
 9.1740071  
 O -5.1052574 24.5572042  
 9.6133433  
 O -3.3758573 23.5644783  
 8.4602196  
 C -3.0888844 24.8141911  
 7.7514655  
 C -3.7851234 24.8094325  
 6.4153349

## 9. Product (R)

C -5.1153195 25.2456854  
6.3025448  
C -5.7895259 25.1543561  
5.0818329  
C -5.1384367 24.6337087  
3.9576431  
C -3.8095436 24.2066473  
4.0583938  
H -5.6235975 25.6464311  
7.1822905  
H -3.4009472 25.6616350  
8.3760844  
H -1.9985688 24.8183383  
7.6381209  
H -6.8250595 25.4930173  
5.0062103  
H -7.4793572 22.8188314  
8.2508450  
H -9.5458145 18.3174528  
13.7776468  
H -8.8831537 22.7783433  
6.2352222  
H -7.7502262 18.5187975  
8.5292936  
H -9.7282360 20.6122163  
5.3215846  
H -5.7889267 21.9757289  
11.2935090  
H -9.1479093 18.4788132  
6.4895276  
H -5.6649994 24.5635443  
3.0034367

C -3.1389584 24.2926443  
5.2819230  
H -7.6167886 17.0839055  
12.7820000  
H -6.2686389 18.1134728  
10.9890689  
  
H -2.1036710 23.9510551  
5.3618687  
H -10.1110993 20.6018657  
12.9366890  
H -3.2954459 23.8043224  
3.1828784  
H -5.3538476 19.0523976  
8.8656545  
H -4.7747877 19.6587935  
10.4344538  
H -8.7777183 21.6244322  
11.1212962  
H -6.8798468 22.8110886  
10.1689695  
C -4.4409701 20.9643099  
7.2650682  
H -3.9820049 20.0177217  
6.9434102  
H -5.4702829 20.9988554  
6.8855721  
H -3.8776014 21.7926588  
6.8192908  
H -3.3607577 20.9679155  
9.1295804
